# Supplementary material for: Novel multiplex PCR assays for rapid identification of Salmonella serogroups B, C1, C2, D, E, S. enteritidis, and S. typhimurium
Source: Royal Society of Chemistry journal article supplement (doi:10.1039/d1ay02163j), 2022-01-01
Supplement: d1ay02163j1.pdf [file d1ay02163j1.pdf]

**Table S1** Detailed information of *Salmonella* genomic sequences.

| Serogroup | Serovar      | Assembly      | Serogroup | Serovar   | Assembly      | Serogroup | Serovar | Assembly      |
|-----------|--------------|---------------|-----------|-----------|---------------|-----------|---------|---------------|
| B         | Paratyphi B  | GCA_486185.1  | B         | Agona     | GCA_483795.1  | D         | Dublin  | GCA_3069745.1 |
| B         | Paratyphi B  | GCA_486665.1  | B         | Agona     | GCA_1244465.1 | D         | Dublin  | GCA_3069865.1 |
| B         | Paratyphi B  | GCA_2034115.1 | B         | Agona     | GCA_388955.1  | D         | Dublin  | GCA_3070265.1 |
| B         | Paratyphi B  | GCA_2033905.1 | B         | Agona     | GCA_484275.1  | D         | Dublin  | GCA_3069825.1 |
| B         | Paratyphi B  | GCA_1614145.1 | B         | Agona     | GCA_2058085.1 | D         | Dublin  | GCA_3069885.1 |
| B         | Paratyphi B  | GCA_1613965.1 | B         | Agona     | GCA_3120155.1 | D         | Dublin  | GCA_3070205.1 |
| B         | Paratyphi B  | GCA_1614125.1 | B         | Agona     | GCA_388835.1  | D         | Dublin  | GCA_3065985.1 |
| B         | Paratyphi B  | GCA_2058475.1 | B         | Agona     | GCA_389295.1  | D         | Dublin  | GCA_3066165.1 |
| B         | Paratyphi B  | GCA_486645.1  | B         | Agona     | GCA_389475.1  | D         | Dublin  | GCA_3070165.1 |
| B         | Paratyphi B  | GCA_1466355.1 | B         | Agona     | GCA_389275.1  | D         | Dublin  | GCA_3070145.1 |
| B         | Paratyphi B  | GCA_484015.1  | B         | Agona     | GCA_389215.1  | D         | Dublin  | GCA_3070285.1 |
| B         | Paratyphi B  | GCA_1614015.1 | B         | Agona     | GCA_389575.1  | D         | Dublin  | GCA_3066025.1 |
| B         | Paratyphi B  | GCA_486685.1  | B         | Agona     | GCA_389235.1  | D         | Dublin  | GCA_3066605.1 |
| B         | Paratyphi B  | GCA_486705.1  | B         | Agona     | GCA_388755.1  | D         | Dublin  | GCA_3070325.1 |
| B         | Paratyphi B  | GCA_486625.1  | B         | Agona     | GCA_388915.1  | D         | Dublin  | GCA_3066125.1 |
| B         | Paratyphi B  | GCA_2034145.1 | B         | Agona     | GCA_389175.1  | D         | Dublin  | GCA_3069625.1 |
| B         | Paratyphi B  | GCA_2034065.1 | B         | Agona     | GCA_389155.1  | D         | Dublin  | GCA_3065965.1 |
| B         | Paratyphi B  | GCA_1466365.1 | B         | Agona     | GCA_2030065.1 | D         | Dublin  | GCA_3069765.1 |
| B         | Paratyphi B  | GCA_486605.1  | B         | Agona     | GCA_388355.1  | D         | Dublin  | GCA_3069935.1 |
| B         | Paratyphi B  | GCA_2065255.1 | B         | Agona     | GCA_388395.1  | D         | Dublin  | GCA_3070305.1 |
| B         | Paratyphi B  | GCA_18705.1   | B         | Agona     | GCA_1649455.1 | D         | Dublin  | GCA_3070225.1 |
| B         | Paratyphi B  | GCA_3121035.1 | B         | Agona     | GCA_388415.1  | D         | Dublin  | GCA_3065925.1 |
| B         | Paratyphi B  | GCA_3117625.1 | B         | Agona     | GCA_388995.1  | D         | Dublin  | GCA_3070105.1 |
| B         | Paratyphi B  | GCA_486205.1  | B         | Agona     | GCA_388455.1  | D         | Dublin  | GCA_3070005.1 |
| B         | Chester      | GCA_2046865.1 | B         | Agona     | GCA_389195.1  | D         | Dublin  | GCA_3070245.1 |
| B         | Chester      | GCA_2047045.1 | B         | Agona     | GCA_1050855.1 | D         | Dublin  | GCA_3065995.1 |
| B         | Chester      | GCA_2046725.1 | B         | Agona     | GCA_389075.1  | D         | Dublin  | GCA_3066285.1 |
| B         | Chester      | GCA_2046965.1 | B         | Agona     | GCA_388515.1  | D         | Dublin  | GCA_3066625.1 |
| B         | Chester      | GCA_2048115.1 | B         | Agona     | GCA_388635.1  | D         | Dublin  | GCA_3069965.1 |
| B         | Chester      | GCA_487255.2  | B         | Agona     | GCA_388855.1  | D         | Dublin  | GCA_3070125.1 |
| B         | Bredeney     | GCA_2047245.1 | B         | Agona     | GCA_388495.1  | D         | Dublin  | GCA_3070605.1 |
| B         | Bredeney     | GCA_2047285.1 | B         | Agona     | GCA_388875.1  | D         | Dublin  | GCA_3066185.1 |
| B         | Bredeney     | GCA_2047265.1 | B         | Agona     | GCA_389095.1  | D         | Dublin  | GCA_3069665.1 |
| B         | Bredeney     | GCA_2048365.1 | B         | Agona     | GCA_389315.1  | D         | Dublin  | GCA_3066135.1 |
| B         | Bredeney     | GCA_2048415.1 | B         | Agona     | GCA_388435.1  | D         | Dublin  | GCA_3066665.1 |
| B         | Bredeney     | GCA_2048505.1 | B         | Agona     | GCA_388815.1  | D         | Dublin  | GCA_3065905.1 |
| B         | Bredeney     | GCA_2063755.1 | B         | Agona     | GCA_388655.1  | D         | Dublin  | GCA_3066825.1 |
| B         | Bredeney     | GCA_1271405.1 | B         | Agona     | GCA_388795.1  | D         | Dublin  | GCA_3066985.1 |
| B         | Bredeney     | GCA_1478645.1 | B         | Agona     | GCA_389535.1  | D         | Dublin  | GCA_3069645.1 |
| B         | Bredeney     | GCA_487775.2  | B         | Agona     | GCA_389115.1  | D         | Dublin  | GCA_3069905.1 |
| B         | Stanleyville | GCA_2266245.1 | B         | Agona     | GCA_389515.1  | D         | Dublin  | GCA_3070185.1 |
| B         | Stanleyville | GCA_2266325.1 | B         | Agona     | GCA_388535.1  | D         | Dublin  | GCA_3070385.1 |
| B         | Stanleyville | GCA_487935.2  | B         | Agona     | GCA_388335.1  | D         | Dublin  | GCA_3070505.1 |
| B         | Typhimurium  | GCA_973985.1  | B         | Agona     | GCA_388375.1  | D         | Dublin  | GCA_3065885.1 |
| B         | Typhimurium  | GCA_292755.1  | B         | Agona     | GCA_388475.1  | D         | Dublin  | GCA_3070085.1 |
| B         | Typhimurium  | GCA_1026705.1 | B         | Agona     | GCA_388735.1  | D         | Dublin  | GCA_3070445.1 |
| B         | Typhimurium  | GCA_1042425.1 | B         | Agona     | GCA_389335.1  | D         | Dublin  | GCA_3066045.1 |
| B         | Typhimurium  | GCA_1027585.1 | B         | Agona     | GCA_388195.1  | D         | Dublin  | GCA_3069725.1 |
| B         | Typhimurium  | GCA_1027595.1 | B         | Agona     | GCA_388575.1  | D         | Dublin  | GCA_3067125.1 |
| B         | Typhimurium  | GCA_1027605.1 | B         | Agona     | GCA_484335.1  | D         | Dublin  | GCA_3070535.1 |
| B         | Typhimurium  | GCA_1027615.1 | B         | Agona     | GCA_389255.1  | D         | Dublin  | GCA_3066485.1 |
| B         | Typhimurium  | GCA_1034525.1 | B         | Agona     | GCA_389455.1  | D         | Dublin  | GCA_3066645.1 |
| B         | Typhimurium  | GCA_1034585.1 | B         | Agona     | GCA_389395.1  | D         | Dublin  | GCA_3066265.1 |
| B         | Typhimurium  | GCA_1034595.1 | B         | Agona     | GCA_389435.1  | D         | Dublin  | GCA_3070065.1 |
| B         | Typhimurium  | GCA_1034605.1 | B         | Agona     | GCA_388615.1  | D         | Dublin  | GCA_3066365.1 |
| B         | Typhimurium  | GCA_1038095.1 | B         | Agona     | GCA_388895.1  | D         | Dublin  | GCA_3066965.1 |
| B         | Typhimurium  | GCA_1038105.1 | B         | Agona     | GCA_388315.1  | D         | Dublin  | GCA_3070585.1 |
| B         | Typhimurium  | GCA_1034565.1 | B         | Agona     | GCA_388595.1  | D         | Dublin  | GCA_3067145.1 |
| B         | Typhimurium  | GCA_1038165.1 | B         | Agona     | GCA_388215.1  | D         | Dublin  | GCA_3070045.1 |
| B         | Typhimurium  | GCA_1038035.1 | B         | Agona     | GCA_388295.1  | D         | Dublin  | GCA_3070525.1 |
| B         | Typhimurium  | GCA_6945.2    | B         | Agona     | GCA_388255.1  | D         | Dublin  | GCA_1246165.1 |
| B         | Typhimurium  | GCA_22165.1   | B         | Agona     | GCA_388695.1  | D         | Dublin  | GCA_3066775.1 |
| B         | Typhimurium  | GCA_27025.1   | B         | Agona     | GCA_389495.1  | D         | Dublin  | GCA_3066805.1 |
| B         | Typhimurium  | GCA_213635.1  | B         | Agona     | GCA_388235.1  | D         | Dublin  | GCA_1247195.1 |
| B         | Typhimurium  | GCA_430145.3  | B         | Agona     | GCA_388675.1  | D         | Dublin  | GCA_3065865.1 |
| B         | Typhimurium  | GCA_486345.2  | B         | Agona     | GCA_484355.1  | D         | Dublin  | GCA_3067005.1 |
| B         | Typhimurium  | GCA_493535.2  | B         | Agona     | GCA_389355.1  | D         | Dublin  | GCA_3066225.1 |
| B         | Typhimurium  | GCA_828595.1  | B         | Agona     | GCA_388275.1  | D         | Dublin  | GCA_3066505.1 |
| B         | Typhimurium  | GCA_941015.2  | B         | Saintpaul | GCA_483975.1  | D         | Dublin  | GCA_3070405.1 |

|   |             |                 |   |           |               |   |        |               |
|---|-------------|-----------------|---|-----------|---------------|---|--------|---------------|
| B | Typhimurium | GCA 1293505.1   | B | Saintpaul | GCA 486545.1  | D | Dublin | GCA 3070485.1 |
| B | Typhimurium | GCA 1454965.1   | B | Saintpaul | GCA 1833965.1 | D | Dublin | GCA 3066405.1 |
| B | Typhimurium | GCA 1617585.1   | B | Saintpaul | GCA 1834535.1 | D | Dublin | GCA 3066565.1 |
| B | Typhimurium | GCA 1623765.2   | B | Saintpaul | GCA 1834565.1 | D | Dublin | GCA 3067095.1 |
| B | Typhimurium | GCA 1623775.1   | B | Saintpaul | GCA 1833345.1 | D | Dublin | GCA 3070565.1 |
| B | Typhimurium | GCA 1623805.1   | B | Saintpaul | GCA 1834015.1 | D | Dublin | GCA 3065945.1 |
| B | Typhimurium | GCA 1623825.2   | B | Saintpaul | GCA 1834125.1 | D | Dublin | GCA 3070345.1 |
| B | Typhimurium | GCA 1623845.1   | B | Saintpaul | GCA 1834305.1 | D | Dublin | GCA 3070455.1 |
| B | Typhimurium | GCA 1705365.1   | B | Saintpaul | GCA 1832855.1 | D | Dublin | GCA 3069805.1 |
| B | Typhimurium | GCA 1729225.1   | B | Saintpaul | GCA 1834525.1 | D | Dublin | GCA 3069925.1 |
| B | Typhimurium | GCA 1887015.1   | B | Saintpaul | GCA 1834605.1 | D | Dublin | GCA 3070015.1 |
| B | Typhimurium | GCA 1922185.1   | B | Saintpaul | GCA 1834465.1 | D | Dublin | GCA 2264965.1 |
| B | Typhimurium | GCA 1989635.1   | B | Saintpaul | GCA 1833225.1 | D | Dublin | GCA 3066105.1 |
| B | Typhimurium | GCA 2009155.1   | B | Saintpaul | GCA 1833415.1 | D | Dublin | GCA 3066585.1 |
| B | Typhimurium | GCA 2210025.1   | B | Saintpaul | GCA 1833655.1 | D | Dublin | GCA 1481195.1 |
| B | Typhimurium | GCA 2762135.1   | B | Saintpaul | GCA 1833805.1 | D | Dublin | GCA 3067025.1 |
| B | Typhimurium | GCA 900184385.1 | B | Saintpaul | GCA 1834005.1 | D | Dublin | GCA 3067185.1 |
| B | Typhimurium | GCA 2209225.1   | B | Saintpaul | GCA 1834385.1 | D | Dublin | GCA 3066465.1 |
| B | Typhimurium | GCA 973645.1    | B | Saintpaul | GCA 1833315.1 | D | Dublin | GCA 2063385.1 |
| B | Typhimurium | GCA 993725.1    | B | Saintpaul | GCA 1833815.1 | D | Dublin | GCA 3069785.1 |
| B | Typhimurium | GCA 1540845.1   | B | Saintpaul | GCA 1834445.1 | D | Dublin | GCA 3066535.1 |
| B | Typhimurium | GCA 1623705.1   | B | Saintpaul | GCA 1834485.1 | D | Dublin | GCA 3066065.1 |
| B | Typhimurium | GCA 1623745.2   | B | Saintpaul | GCA 1834495.1 | D | Dublin | GCA 3066085.1 |
| B | Typhimurium | GCA 2813935.1   | B | Saintpaul | GCA 1835315.1 | D | Dublin | GCA 3067085.1 |
| B | Typhimurium | GCA 3031835.1   | B | Saintpaul | GCA 1479215.1 | D | Dublin | GCA 1242765.1 |
| B | Typhimurium | GCA 1587055.1   | B | Saintpaul | GCA 1832595.1 | D | Dublin | GCA 2065815.1 |
| B | Typhimurium | GCA 252875.1    | B | Saintpaul | GCA 1833465.1 | D | Dublin | GCA 2030115.1 |
| B | Typhimurium | GCA 493675.1    | B | Saintpaul | GCA 1833935.1 | D | Dublin | GCA 3066295.1 |
| B | Typhimurium | GCA 636135.1    | B | Saintpaul | GCA 1833975.1 | D | Dublin | GCA 2090385.1 |
| B | Typhimurium | GCA 715155.2    | B | Saintpaul | GCA 1833855.1 | D | Dublin | GCA 3068715.1 |
| B | Typhimurium | GCA 743055.1    | B | Saintpaul | GCA 1244095.1 | D | Dublin | GCA 2090565.1 |
| B | Typhimurium | GCA 1576255.1   | B | Saintpaul | GCA 2063415.1 | D | Dublin | GCA 2090755.1 |
| B | Typhimurium | GCA 1576275.1   | B | Saintpaul | GCA 1244055.1 | D | Dublin | GCA 1480305.1 |
| B | Typhimurium | GCA 1577505.1   | B | Saintpaul | GCA 486165.2  | D | Dublin | GCA 2264615.1 |
| B | Typhimurium | GCA 1623685.1   | B | Saintpaul | GCA 1952995.1 | D | Dublin | GCA 3066715.1 |
| B | Typhimurium | GCA 1623725.1   | B | Saintpaul | GCA 1953675.1 | D | Dublin | GCA 3067165.1 |
| B | Typhimurium | GCA 2313125.1   | B | Saintpaul | GCA 1953695.1 | D | Dublin | GCA 3069705.1 |
| B | Typhimurium | GCA 2947135.1   | B | Saintpaul | GCA 2290205.1 | D | Dublin | GCA 3069845.1 |
| B | Typhimurium | GCA 3030285.1   | B | Saintpaul | GCA 2386325.1 | D | Dublin | GCA 1480725.1 |
| B | Typhimurium | GCA 3032015.1   | B | Saintpaul | GCA 170215.1  | D | Dublin | GCA 1245745.1 |
| B | Typhimurium | GCA 283735.1    | B | Saintpaul | GCA 2234735.1 | D | Dublin | GCA 3066385.1 |
| B | Typhimurium | GCA 900166885.1 | B | Saintpaul | GCA 1271755.1 | D | Dublin | GCA 2090735.1 |
| B | Typhimurium | GCA 188735.1    | B | Saintpaul | GCA 3068765.1 | D | Dublin | GCA 1954985.1 |
| B | Typhimurium | GCA 210855.2    | B | Saintpaul | GCA 1244325.1 | D | Dublin | GCA 1954925.1 |
| B | Typhimurium | GCA 380325.1    | B | Saintpaul | GCA 3068965.1 | D | Dublin | GCA 2090455.1 |
| B | Typhimurium | GCA 1623645.2   | B | Saintpaul | GCA 1247105.1 | D | Dublin | GCA 1954935.1 |
| B | Typhimurium | GCA 3194225.1   | B | Saintpaul | GCA 1478745.1 | D | Dublin | GCA 2090465.1 |
| B | Typhimurium | GCA 1038115.1   | B | Saintpaul | GCA 2031465.1 | D | Dublin | GCA 2090475.1 |
| B | Typhimurium | GCA 1038085.1   | B | Saintpaul | GCA 1245335.1 | D | Dublin | GCA 3067065.1 |
| B | Typhimurium | GCA 3148925.1   | B | Saintpaul | GCA 3069025.1 | D | Dublin | GCA 3066425.1 |
| B | Typhimurium | GCA 187785.2    | B | Saintpaul | GCA 1477945.1 | D | Dublin | GCA 1245835.1 |
| B | Typhimurium | GCA 1034545.1   | B | Saintpaul | GCA 3069045.1 | D | Dublin | GCA 1954905.1 |
| B | Typhimurium | GCA 1034615.1   | B | Saintpaul | GCA 1243205.1 | D | Dublin | GCA 1954975.1 |
| B | Typhimurium | GCA 2740635.1   | B | Saintpaul | GCA 1478765.1 | D | Dublin | GCA 1954705.1 |
| B | Typhimurium | GCA 336215.1    | B | Saintpaul | GCA 1240335.1 | D | Dublin | GCA 2090395.1 |
| B | Typhimurium | GCA 1295485.1   | B | Saintpaul | GCA 1243455.1 | D | Dublin | GCA 1954745.1 |
| B | Typhimurium | GCA 3074615.1   | B | Saintpaul | GCA 1477905.1 | D | Dublin | GCA 2090375.1 |
| B | Typhimurium | GCA 3032275.1   | B | Saintpaul | GCA 1240225.1 | D | Dublin | GCA 1954995.1 |
| B | Typhimurium | GCA 1350055.1   | B | Saintpaul | GCA 1241665.1 | D | Dublin | GCA 2090775.1 |
| B | Typhimurium | GCA 1350195.1   | B | Saintpaul | GCA 1478685.1 | D | Dublin | GCA 1954735.1 |
| B | Typhimurium | GCA 2798675.1   | B | Saintpaul | GCA 1481045.1 | D | Dublin | GCA 2061495.1 |
| B | Typhimurium | GCA 1219925.1   | B | Saintpaul | GCA 2032725.1 | D | Dublin | GCA 2090485.1 |
| B | Typhimurium | GCA 1097045.1   | B | Saintpaul | GCA 1242655.1 | D | Dublin | GCA 3066215.1 |
| B | Typhimurium | GCA 3032135.1   | B | Saintpaul | GCA 1243905.1 | D | Dublin | GCA 3066435.1 |
| B | Typhimurium | GCA 3032295.1   | B | Saintpaul | GCA 1478225.1 | D | Dublin | GCA 336035.1  |
| B | Typhimurium | GCA 3032105.1   | B | Saintpaul | GCA 3069085.1 | D | Dublin | GCA 3070365.1 |
| B | Typhimurium | GCA 3032095.1   | B | Saintpaul | GCA 1243195.1 | D | Dublin | GCA 3066205.1 |
| B | Typhimurium | GCA 3032145.1   | B | Saintpaul | GCA 1245345.1 | D | Dublin | GCA 3066685.1 |
| B | Typhimurium | GCA 3032255.1   | B | Saintpaul | GCA 1478245.1 | D | Dublin | GCA 1480245.1 |
| B | Typhimurium | GCA 474475.1    | B | Saintpaul | GCA 1242115.1 | D | Dublin | GCA 3066705.1 |
| B | Typhimurium | GCA 1295725.1   | B | Saintpaul | GCA 1243445.1 | D | Dublin | GCA 3066765.1 |

|   |             |               |   |                |               |   |             |                 |
|---|-------------|---------------|---|----------------|---------------|---|-------------|-----------------|
| B | Typhimurium | GCA 2193545.1 | B | Saintpaul      | GCA 2063255.1 | D | Dublin      | GCA 3067045.1   |
| B | Typhimurium | GCA 3032235.1 | B | Saintpaul      | GCA 1478155.1 | D | Dublin      | GCA 3066725.1   |
| B | Typhimurium | GCA 474355.1  | B | Saintpaul      | GCA 495295.1  | D | Javiana     | GCA 171255.1    |
| B | Typhimurium | GCA 1129385.1 | B | Saintpaul      | GCA 2032025.1 | D | Javiana     | GCA 1707555.1   |
| B | Typhimurium | GCA 1161925.1 | B | Saintpaul      | GCA 1243775.1 | D | Javiana     | GCA 2061445.1   |
| B | Typhimurium | GCA 1350115.1 | B | Saintpaul      | GCA 1479185.1 | D | Javiana     | GCA 2059385.1   |
| B | Typhimurium | GCA 3032335.1 | B | Saintpaul      | GCA 2030545.1 | D | Javiana     | GCA 2064765.1   |
| B | Typhimurium | GCA 474335.1  | B | Saintpaul      | GCA 1244925.1 | D | Javiana     | GCA 2064715.1   |
| B | Typhimurium | GCA 1295425.1 | B | Saintpaul      | GCA 2031105.1 | D | Javiana     | GCA 2059825.1   |
| B | Typhimurium | GCA 1595115.1 | B | Saintpaul      | GCA 1246025.1 | D | Javiana     | GCA 2063095.1   |
| B | Typhimurium | GCA 2193525.1 | B | Saintpaul      | GCA 1479385.1 | D | Javiana     | GCA 2059715.1   |
| B | Typhimurium | GCA 1091445.1 | B | Saintpaul      | GCA 1479275.1 | D | Javiana     | GCA 1938855.1   |
| B | Typhimurium | GCA 1350075.1 | B | Saintpaul      | GCA 1243085.1 | D | Javiana     | GCA 1938925.1   |
| B | Typhimurium | GCA 1120065.1 | B | Saintpaul      | GCA 3068805.1 | D | Javiana     | GCA 335955.1    |
| B | Typhimurium | GCA 1159405.1 | B | Saintpaul      | GCA 1479205.1 | D | Javiana     | GCA 1938885.1   |
| B | Typhimurium | GCA 1102665.1 | B | Saintpaul      | GCA 2032665.1 | D | Javiana     | GCA 2061385.1   |
| B | Typhimurium | GCA 1139325.1 | B | Saintpaul      | GCA 2031275.1 | D | Javiana     | GCA 2034745.1   |
| B | Typhimurium | GCA 1162405.1 | B | Saintpaul      | GCA 2064045.1 | D | Javiana     | GCA 2060175.1   |
| B | Typhimurium | GCA 1295595.1 | B | Saintpaul      | GCA 1244935.1 | D | Javiana     | GCA 1478595.1   |
| B | Typhimurium | GCA 1594745.1 | B | Saintpaul      | GCA 170235.1  | D | Javiana     | GCA 1938865.1   |
| B | Typhimurium | GCA 1692145.1 | B | Derby          | GCA 2234755.1 | D | Javiana     | GCA 487095.1    |
| B | Typhimurium | GCA 2193595.1 | B | Derby          | GCA 1040825.1 | D | Javiana     | GCA 1938795.1   |
| B | Typhimurium | GCA 2193605.1 | B | Derby          | GCA 1478465.1 | D | Javiana     | GCA 2059665.1   |
| B | Typhimurium | GCA 2193615.1 | B | Derby          | GCA 2030965.1 | D | Javiana     | GCA 487115.1    |
| B | Typhimurium | GCA 1119985.1 | B | Derby          | GCA 1613955.1 | D | Javiana     | GCA 341425.1    |
| B | Typhimurium | GCA 1220985.1 | B | Derby          | GCA 1481215.1 | D | Javiana     | GCA 335955.1    |
| B | Typhimurium | GCA 1221705.1 | B | Derby          | GCA 1262435.1 | D | Javiana     | GCA 1707555.1   |
| B | Typhimurium | GCA 1350135.1 | B | Derby          | GCA 2032345.1 | D | Javiana     | GCA 1938885.1   |
| B | Typhimurium | GCA 1350255.1 | B | Derby          | GCA 2066555.1 | D | Javiana     | GCA 2059715.1   |
| B | Typhimurium | GCA 2028585.1 | B | Derby          | GCA 2065865.1 | D | Javiana     | GCA 2059385.1   |
| B | Typhimurium | GCA 3032375.1 | B | Derby          | GCA 2061135.1 | D | Javiana     | GCA 2059665.1   |
| B | Typhimurium | GCA 1295465.1 | B | Derby          | GCA 2032085.1 | D | Javiana     | GCA 2059825.1   |
| B | Typhimurium | GCA 1594855.1 | B | Derby          | GCA 1244515.1 | D | Javiana     | GCA 2063095.1   |
| B | Typhimurium | GCA 2289265.1 | B | Derby          | GCA 1613945.1 | D | Javiana     | GCA 2064715.1   |
| B | Typhimurium | GCA 1110745.1 | B | Derby          | GCA 1246825.1 | D | Javiana     | GCA 3067505.1   |
| B | Typhimurium | GCA 2193535.1 | B | Derby          | GCA 2031835.1 | D | Javiana     | GCA 3117235.1   |
| B | Typhimurium | GCA 1120665.1 | B | Derby          | GCA 1478025.1 | D | Javiana     | GCA 3117915.1   |
| B | Typhimurium | GCA 1154285.1 | B | Derby          | GCA 2030215.1 | D | Javiana     | GCA 1938795.1   |
| B | Typhimurium | GCA 1350175.1 | B | Derby          | GCA 2065855.1 | D | Gallinarum  | GCA 192125.1    |
| B | Typhimurium | GCA 1350275.1 | B | Derby          | GCA 1475515.1 | D | Gallinarum  | GCA 1448635.1   |
| B | Typhimurium | GCA 3032215.1 | B | Derby          | GCA 1242475.1 | D | Gallinarum  | GCA 1484835.1   |
| B | Typhimurium | GCA 1130025.1 | B | Derby          | GCA 1478085.1 | D | Gallinarum  | GCA 801935.1    |
| B | Typhimurium | GCA 1140725.1 | B | Reading        | GCA 2066775.1 | D | Gallinarum  | GCA 9525.1      |
| B | Typhimurium | GCA 1295705.1 | B | Reading        | GCA 1241715.1 | D | Gallinarum  | GCA 335995.2    |
| B | Typhimurium | GCA 1691985.1 | B | Reading        | GCA 1481255.1 | D | Pullorum    | GCA 953595.1    |
| B | Typhimurium | GCA 1127885.1 | B | Reading        | GCA 1480185.1 | D | Pullorum    | GCA 1448575.1   |
| B | Typhimurium | GCA 1153005.1 | B | Reading        | GCA 1243985.1 | D | Pullorum    | GCA 900067255.1 |
| B | Typhimurium | GCA 1155485.1 | B | Reading        | GCA 1246075.1 | D | Pullorum    | GCA 484295.1    |
| B | Typhimurium | GCA 1219465.1 | B | Reading        | GCA 1477955.1 | D | Pullorum    | GCA 486745.1    |
| B | Typhimurium | GCA 1219525.1 | B | Reading        | GCA 1246365.1 | D | Pullorum    | GCA 330485.2    |
| B | Typhimurium | GCA 2074775.1 | B | Reading        | GCA 1244455.1 | D | Pullorum    | GCA 444445.1    |
| B | Typhimurium | GCA 1085685.1 | B | Reading        | GCA 2048855.1 | D | Enteritidis | GCA 9505.1      |
| B | Typhimurium | GCA 1130925.1 | B | Reading        | GCA 2048825.1 | D | Enteritidis | GCA 280315.2    |
| B | Typhimurium | GCA 1164765.1 | B | Reading        | GCA 2064115.1 | D | Enteritidis | GCA 329365.2    |
| B | Typhimurium | GCA 1350215.1 | B | Reading        | GCA 1481335.1 | D | Enteritidis | GCA 335875.2    |
| B | Typhimurium | GCA 2029445.1 | B | Reading        | GCA 2030715.1 | D | Enteritidis | GCA 612325.1    |
| B | Typhimurium | GCA 474575.1  | B | Reading        | GCA 2031205.1 | D | Enteritidis | GCA 623135.2    |
| B | Typhimurium | GCA 1146465.1 | B | Indiana        | GCA 1276865.1 | D | Enteritidis | GCA 623195.2    |
| B | Typhimurium | GCA 1756075.1 | B | Indiana        | GCA 487135.1  | D | Enteritidis | GCA 623275.1    |
| B | Typhimurium | GCA 1172545.1 | B | Indiana        | GCA 2048175.1 | D | Enteritidis | GCA 623735.2    |
| B | Typhimurium | GCA 2074335.1 | B | Indiana        | GCA 2046685.1 | D | Enteritidis | GCA 624055.2    |
| B | Typhimurium | GCA 2074515.1 | B | Indiana        | GCA 2062235.1 | D | Enteritidis | GCA 624155.1    |
| B | Typhimurium | GCA 3032175.1 | B | Indiana        | GCA 2047005.1 | D | Enteritidis | GCA 624175.2    |
| B | Typhimurium | GCA 1350155.1 | B | Indiana        | GCA 2224405.1 | D | Enteritidis | GCA 626255.1    |
| B | Typhimurium | GCA 1093545.1 | B | Schwarzengrund | GCA 20745.1   | D | Enteritidis | GCA 626275.2    |
| B | Typhimurium | GCA 1105145.1 | B | Schwarzengrund | GCA 171295.1  | D | Enteritidis | GCA 626295.1    |
| B | Typhimurium | GCA 1125725.1 | B | Schwarzengrund | GCA 1240275.1 | D | Enteritidis | GCA 626695.2    |
| B | Typhimurium | GCA 1131525.1 | B | Schwarzengrund | GCA 1240625.1 | D | Enteritidis | GCA 750335.1    |
| B | Typhimurium | GCA 1137885.1 | B | Schwarzengrund | GCA 1241265.1 | D | Enteritidis | GCA 750375.1    |
| B | Typhimurium | GCA 1350035.1 | B | Schwarzengrund | GCA 1242265.1 | D | Enteritidis | GCA 754375.1    |
| B | Typhimurium | GCA 2074375.1 | B | Schwarzengrund | GCA 1243745.1 | D | Enteritidis | GCA 1185215.1   |

|   |             |               |    |                |               |   |             |               |
|---|-------------|---------------|----|----------------|---------------|---|-------------|---------------|
| B | Typhimurium | GCA 2074595.1 | B  | Schwarzengrund | GCA 1245545.1 | D | Enteritidis | GCA 1305235.1 |
| B | Typhimurium | GCA 2066505.1 | B  | Schwarzengrund | GCA 1246305.1 | D | Enteritidis | GCA 1484025.1 |
| B | Typhimurium | GCA 1172145.1 | B  | Schwarzengrund | GCA 1246555.1 | D | Enteritidis | GCA 1647045.1 |
| B | Typhimurium | GCA 2029395.1 | B  | Schwarzengrund | GCA 1246985.1 | D | Enteritidis | GCA 1973275.2 |
| B | Typhimurium | GCA 2029715.1 | B  | Schwarzengrund | GCA 1247455.1 | D | Enteritidis | GCA 2760955.1 |
| B | Typhimurium | GCA 3097395.1 | B  | Schwarzengrund | GCA 1271815.1 | D | Enteritidis | GCA 2760975.1 |
| B | Typhimurium | GCA 3120755.1 | B  | Schwarzengrund | GCA 1478525.1 | D | Enteritidis | GCA 2760995.1 |
| B | Typhimurium | GCA 1217445.1 | B  | Schwarzengrund | GCA 1479805.1 | D | Enteritidis | GCA 2761015.1 |
| B | Typhimurium | GCA 2029705.1 | B  | Schwarzengrund | GCA 1480325.1 | D | Enteritidis | GCA 2761035.1 |
| B | Typhimurium | GCA 2074185.1 | B  | Schwarzengrund | GCA 1480535.1 | D | Enteritidis | GCA 2763415.1 |
| B | Typhimurium | GCA 2074525.1 | B  | Schwarzengrund | GCA 1480895.1 | D | Enteritidis | GCA 623055.2  |
| B | Typhimurium | GCA 2074735.1 | B  | Schwarzengrund | GCA 1614045.1 | D | Enteritidis | GCA 623095.2  |
| B | Typhimurium | GCA 1350235.1 | B  | Schwarzengrund | GCA 1614065.1 | D | Enteritidis | GCA 623115.2  |
| B | Typhimurium | GCA 3120035.1 | B  | Schwarzengrund | GCA 1614095.1 | D | Enteritidis | GCA 623295.1  |
| B | Typhimurium | GCA 1116925.1 | B  | Schwarzengrund | GCA 1614105.1 | D | Enteritidis | GCA 623315.1  |
| B | Typhimurium | GCA 2029485.1 | B  | Schwarzengrund | GCA 2031125.1 | D | Enteritidis | GCA 623335.1  |
| B | Typhimurium | GCA 2074715.1 | B  | Schwarzengrund | GCA 2031905.1 | D | Enteritidis | GCA 623355.1  |
| B | Typhimurium | GCA 2289275.1 | B  | Schwarzengrund | GCA 2033085.1 | D | Enteritidis | GCA 623375.1  |
| B | Typhimurium | GCA 336195.1  | B  | Schwarzengrund | GCA 2033125.1 | D | Enteritidis | GCA 623395.2  |
| B | Typhimurium | GCA 1295555.1 | B  | Schwarzengrund | GCA 2063955.1 | D | Enteritidis | GCA 623455.2  |
| B | Typhimurium | GCA 1884505.1 | B  | Brandenburg    | GCA 1243855.1 | D | Enteritidis | GCA 623475.2  |
| B | Typhimurium | GCA 2031925.1 | B  | Brandenburg    | GCA 1242575.1 | D | Enteritidis | GCA 623615.2  |
| B | Typhimurium | GCA 1154585.1 | B  | Brandenburg    | GCA 1246205.1 | D | Enteritidis | GCA 623655.2  |
| B | Typhimurium | GCA 2029365.1 | B  | Brandenburg    | GCA 2035925.1 | D | Enteritidis | GCA 623675.2  |
| B | Typhimurium | GCA 2074655.1 | B  | Brandenburg    | GCA 2063195.1 | D | Enteritidis | GCA 623715.2  |
| B | Typhimurium | GCA 2074795.1 | B  | Brandenburg    | GCA 2066025.1 | D | Enteritidis | GCA 624395.2  |
| B | Typhimurium | GCA 2798555.1 | B  | Kiambu         | GCA 2047805.1 | D | Enteritidis | GCA 625855.2  |
| B | Typhimurium | GCA 1272415.1 | B  | Kiambu         | GCA 2047545.1 | D | Enteritidis | GCA 626095.2  |
| B | Typhimurium | GCA 1594685.1 | B  | Kiambu         | GCA 2047555.1 | D | Enteritidis | GCA 626175.1  |
| B | Typhimurium | GCA 1085145.1 | B  | Kiambu         | GCA 2048645.1 | D | Enteritidis | GCA 626195.1  |
| B | Typhimurium | GCA 2028625.1 | B  | Kiambu         | GCA 3119325.1 | D | Enteritidis | GCA 626215.1  |
| B | Typhimurium | GCA 2029675.1 | B  | Kiambu         | GCA 3118115.1 | D | Enteritidis | GCA 626235.1  |
| B | Typhimurium | GCA 2029795.1 | B  | Legon          | GCA 3072845.1 | D | Enteritidis | GCA 626335.1  |
| B | Typhimurium | GCA 2074455.1 | B  | Legon          | GCA 3072905.1 | D | Enteritidis | GCA 626355.1  |
| B | Typhimurium | GCA 2074465.1 | B  | Legon          | GCA 3072925.1 | D | Enteritidis | GCA 626375.1  |
| B | Typhimurium | GCA 2074685.1 | B  | Legon          | GCA 3072965.1 | D | Enteritidis | GCA 750215.1  |
| B | Typhimurium | GCA 1272475.1 | B  | Legon          | GCA 3072785.1 | D | Enteritidis | GCA 750255.1  |
| B | Typhimurium | GCA 1594775.1 | B  | Legon          | GCA 3072825.1 | D | Enteritidis | GCA 750295.1  |
| B | Typhimurium | GCA 1096565.1 | B  | Legon          | GCA 3072885.1 | D | Enteritidis | GCA 750395.2  |
| B | Typhimurium | GCA 1111905.1 | B  | Legon          | GCA 3072945.1 | D | Enteritidis | GCA 750415.2  |
| B | Typhimurium | GCA 1222725.1 | B  | Sloterdijk     | GCA 486445.2  | D | Enteritidis | GCA 750435.1  |
| B | Typhimurium | GCA 2074385.1 | B  | Abony          | GCA 487615.2  | D | Enteritidis | GCA 750455.1  |
| B | Typhimurium | GCA 2074635.1 | B  | Essen          | GCA 2507445.1 | D | Enteritidis | GCA 750475.1  |
| B | Typhimurium | GCA 2798695.1 | C1 | Infantis       | GCA 1691915.1 | D | Enteritidis | GCA 750495.1  |
| B | Typhimurium | GCA 1692065.1 | C1 | Infantis       | GCA 2200735.1 | D | Enteritidis | GCA 1185245.1 |
| B | Typhimurium | GCA 468255.1  | C1 | Infantis       | GCA 2206125.1 | D | Enteritidis | GCA 2220345.1 |
| B | Typhimurium | GCA 1271645.1 | C1 | Infantis       | GCA 1951775.1 | D | Enteritidis | GCA 2982095.1 |
| B | Typhimurium | GCA 1295385.1 | C1 | Infantis       | GCA 2200655.1 | D | Enteritidis | GCA 623075.2  |
| B | Typhimurium | GCA 1295405.1 | C1 | Infantis       | GCA 2592295.1 | D | Enteritidis | GCA 623155.2  |
| B | Typhimurium | GCA 1756125.1 | C1 | Infantis       | GCA 2030975.1 | D | Enteritidis | GCA 623175.2  |
| B | Typhimurium | GCA 1326215.1 | C1 | Infantis       | GCA 1906505.1 | D | Enteritidis | GCA 623215.2  |
| B | Typhimurium | GCA 2028595.1 | C1 | Infantis       | GCA 2200315.1 | D | Enteritidis | GCA 623235.2  |
| B | Typhimurium | GCA 2028675.1 | C1 | Infantis       | GCA 2064875.1 | D | Enteritidis | GCA 623255.2  |
| B | Typhimurium | GCA 2074225.1 | C1 | Infantis       | GCA 2592315.1 | D | Enteritidis | GCA 623415.2  |
| B | Typhimurium | GCA 2074395.1 | C1 | Infantis       | GCA 1951835.1 | D | Enteritidis | GCA 623435.2  |
| B | Typhimurium | GCA 2074445.1 | C1 | Infantis       | GCA 1766495.1 | D | Enteritidis | GCA 623495.2  |
| B | Typhimurium | GCA 2074555.1 | C1 | Infantis       | GCA 2030305.1 | D | Enteritidis | GCA 623515.2  |
| B | Typhimurium | GCA 2074605.1 | C1 | Infantis       | GCA 1766515.1 | D | Enteritidis | GCA 623535.2  |
| B | Typhimurium | GCA 1241895.1 | C1 | Infantis       | GCA 1951705.1 | D | Enteritidis | GCA 623555.2  |
| B | Typhimurium | GCA 1247185.1 | C1 | Infantis       | GCA 2592155.1 | D | Enteritidis | GCA 623575.2  |
| B | Typhimurium | GCA 1594825.1 | C1 | Infantis       | GCA 2200605.1 | D | Enteritidis | GCA 623595.2  |
| B | Typhimurium | GCA 1755945.1 | C1 | Infantis       | GCA 2200475.1 | D | Enteritidis | GCA 623635.2  |
| B | Typhimurium | GCA 1756065.1 | C1 | Infantis       | GCA 2200795.1 | D | Enteritidis | GCA 623695.2  |
| B | Typhimurium | GCA 1565995.1 | C1 | Infantis       | GCA 2200565.1 | D | Enteritidis | GCA 623755.2  |
| B | Typhimurium | GCA 2029665.1 | C1 | Infantis       | GCA 2200485.1 | D | Enteritidis | GCA 623775.2  |
| B | Typhimurium | GCA 2074235.1 | C1 | Infantis       | GCA 2064895.1 | D | Enteritidis | GCA 623795.2  |
| B | Typhimurium | GCA 2074675.1 | C1 | Infantis       | GCA 2592145.1 | D | Enteritidis | GCA 623815.2  |
| B | Typhimurium | GCA 2289225.1 | C1 | Infantis       | GCA 2592215.1 | D | Enteritidis | GCA 623835.2  |
| B | Typhimurium | GCA 3032195.1 | C1 | Infantis       | GCA 2200395.1 | D | Enteritidis | GCA 623855.2  |
| B | Typhimurium | GCA 974125.1  | C1 | Infantis       | GCA 2592095.1 | D | Enteritidis | GCA 623875.2  |
| B | Typhimurium | GCA 1215685.1 | C1 | Infantis       | GCA 2592235.1 | D | Enteritidis | GCA 623895.2  |

|   |             |               |    |          |               |   |             |              |
|---|-------------|---------------|----|----------|---------------|---|-------------|--------------|
| B | Typhimurium | GCA 1350095.1 | C1 | Infantis | GCA 1951695.1 | D | Enteritidis | GCA 623915.2 |
| B | Typhimurium | GCA 2028635.1 | C1 | Infantis | GCA 1766505.1 | D | Enteritidis | GCA 623935.2 |
| B | Typhimurium | GCA 2029375.1 | C1 | Infantis | GCA 1906535.1 | D | Enteritidis | GCA 623955.2 |
| B | Typhimurium | GCA 2029825.1 | C1 | Infantis | GCA 2200285.1 | D | Enteritidis | GCA 623975.2 |
| B | Typhimurium | GCA 2074545.1 | C1 | Infantis | GCA 2200525.1 | D | Enteritidis | GCA 623995.2 |
| B | Typhimurium | GCA 2074745.1 | C1 | Infantis | GCA 2200755.1 | D | Enteritidis | GCA 624015.2 |
| B | Typhimurium | GCA 1595265.1 | C1 | Infantis | GCA 1971045.1 | D | Enteritidis | GCA 624035.2 |
| B | Typhimurium | GCA 1756245.1 | C1 | Infantis | GCA 2237355.1 | D | Enteritidis | GCA 624075.2 |
| B | Typhimurium | GCA 2264665.1 | C1 | Infantis | GCA 1442675.1 | D | Enteritidis | GCA 624095.2 |
| B | Typhimurium | GCA 1095425.1 | C1 | Infantis | GCA 953495.1  | D | Enteritidis | GCA 624115.2 |
| B | Typhimurium | GCA 1164125.1 | C1 | Infantis | GCA 1931555.1 | D | Enteritidis | GCA 624135.2 |
| B | Typhimurium | GCA 1215545.1 | C1 | Infantis | GCA 1931575.1 | D | Enteritidis | GCA 624195.2 |
| B | Typhimurium | GCA 2029765.1 | C1 | Infantis | GCA 1931595.1 | D | Enteritidis | GCA 624215.2 |
| B | Typhimurium | GCA 2074305.1 | C1 | Infantis | GCA 1931615.1 | D | Enteritidis | GCA 624235.2 |
| B | Typhimurium | GCA 1246625.1 | C1 | Infantis | GCA 2863785.1 | D | Enteritidis | GCA 624255.2 |
| B | Typhimurium | GCA 1271965.1 | C1 | Infantis | GCA 230875.1  | D | Enteritidis | GCA 624275.2 |
| B | Typhimurium | GCA 1295545.1 | C1 | Infantis | GCA 1952165.1 | D | Enteritidis | GCA 624295.2 |
| B | Typhimurium | GCA 1594615.1 | C1 | Infantis | GCA 3117775.1 | D | Enteritidis | GCA 624315.2 |
| B | Typhimurium | GCA 1756185.1 | C1 | Infantis | GCA 2059515.1 | D | Enteritidis | GCA 624335.2 |
| B | Typhimurium | GCA 2030225.1 | C1 | Infantis | GCA 2200515.1 | D | Enteritidis | GCA 624355.2 |
| B | Typhimurium | GCA 974095.1  | C1 | Infantis | GCA 2592195.1 | D | Enteritidis | GCA 624375.2 |
| B | Typhimurium | GCA 1218625.1 | C1 | Infantis | GCA 3117615.1 | D | Enteritidis | GCA 624415.2 |
| B | Typhimurium | GCA 1223225.1 | C1 | Infantis | GCA 2200275.1 | D | Enteritidis | GCA 624435.2 |
| B | Typhimurium | GCA 2029785.1 | C1 | Infantis | GCA 2592255.1 | D | Enteritidis | GCA 624455.2 |
| B | Typhimurium | GCA 2074175.1 | C1 | Infantis | GCA 1951765.1 | D | Enteritidis | GCA 624475.2 |
| B | Typhimurium | GCA 2074345.1 | C1 | Infantis | GCA 2032145.1 | D | Enteritidis | GCA 624495.2 |
| B | Typhimurium | GCA 1246265.1 | C1 | Infantis | GCA 2200665.1 | D | Enteritidis | GCA 624515.2 |
| B | Typhimurium | GCA 2030995.1 | C1 | Infantis | GCA 1952215.1 | D | Enteritidis | GCA 624535.2 |
| B | Typhimurium | GCA 2032065.1 | C1 | Infantis | GCA 2107535.1 | D | Enteritidis | GCA 624555.2 |
| B | Typhimurium | GCA 973915.1  | C1 | Infantis | GCA 3119615.1 | D | Enteritidis | GCA 624575.2 |
| B | Typhimurium | GCA 1218605.1 | C1 | Infantis | GCA 1242875.1 | D | Enteritidis | GCA 624595.2 |
| B | Typhimurium | GCA 2029745.1 | C1 | Infantis | GCA 1906515.1 | D | Enteritidis | GCA 624615.2 |
| B | Typhimurium | GCA 2029835.1 | C1 | Infantis | GCA 1952205.1 | D | Enteritidis | GCA 624635.2 |
| B | Typhimurium | GCA 2074215.1 | C1 | Infantis | GCA 2200335.1 | D | Enteritidis | GCA 624655.2 |
| B | Typhimurium | GCA 2074245.1 | C1 | Infantis | GCA 3118035.1 | D | Enteritidis | GCA 624675.2 |
| B | Typhimurium | GCA 786025.1  | C1 | Infantis | GCA 2030855.1 | D | Enteritidis | GCA 624695.2 |
| B | Typhimurium | GCA 1755985.1 | C1 | Infantis | GCA 3119355.1 | D | Enteritidis | GCA 624715.2 |
| B | Typhimurium | GCA 1135785.1 | C1 | Infantis | GCA 1997485.1 | D | Enteritidis | GCA 624735.2 |
| B | Typhimurium | GCA 2798595.1 | C1 | Infantis | GCA 2200745.1 | D | Enteritidis | GCA 624755.2 |
| B | Typhimurium | GCA 465195.1  | C1 | Infantis | GCA 1244215.1 | D | Enteritidis | GCA 624775.2 |
| B | Typhimurium | GCA 1245645.1 | C1 | Infantis | GCA 1951785.1 | D | Enteritidis | GCA 624795.2 |
| B | Typhimurium | GCA 1594845.1 | C1 | Infantis | GCA 1246465.1 | D | Enteritidis | GCA 624815.2 |
| B | Typhimurium | GCA 1755895.1 | C1 | Infantis | GCA 2200715.1 | D | Enteritidis | GCA 624835.2 |
| B | Typhimurium | GCA 2030605.1 | C1 | Infantis | GCA 2200635.1 | D | Enteritidis | GCA 624855.2 |
| B | Typhimurium | GCA 2035135.1 | C1 | Infantis | GCA 1244865.1 | D | Enteritidis | GCA 624875.2 |
| B | Typhimurium | GCA 2106175.1 | C1 | Infantis | GCA 1971055.1 | D | Enteritidis | GCA 624895.2 |
| B | Typhimurium | GCA 1217665.1 | C1 | Infantis | GCA 3077795.1 | D | Enteritidis | GCA 624915.2 |
| B | Typhimurium | GCA 1222865.1 | C1 | Infantis | GCA 1242545.1 | D | Enteritidis | GCA 624935.2 |
| B | Typhimurium | GCA 2798835.1 | C1 | Infantis | GCA 1246295.1 | D | Enteritidis | GCA 624955.2 |
| B | Typhimurium | GCA 1242565.1 | C1 | Infantis | GCA 1970895.1 | D | Enteritidis | GCA 624975.2 |
| B | Typhimurium | GCA 1247265.1 | C1 | Infantis | GCA 1952225.1 | D | Enteritidis | GCA 624995.2 |
| B | Typhimurium | GCA 1247275.1 | C1 | Infantis | GCA 2119135.1 | D | Enteritidis | GCA 625015.2 |
| B | Typhimurium | GCA 1272535.1 | C1 | Infantis | GCA 2198745.1 | D | Enteritidis | GCA 625035.2 |
| B | Typhimurium | GCA 1755875.1 | C1 | Infantis | GCA 2592105.1 | D | Enteritidis | GCA 625055.2 |
| B | Typhimurium | GCA 1755955.1 | C1 | Infantis | GCA 3118235.1 | D | Enteritidis | GCA 625075.2 |
| B | Typhimurium | GCA 2031265.1 | C1 | Infantis | GCA 2592275.1 | D | Enteritidis | GCA 625095.2 |
| B | Typhimurium | GCA 3119095.1 | C1 | Infantis | GCA 2200435.1 | D | Enteritidis | GCA 625115.2 |
| B | Typhimurium | GCA 1214865.1 | C1 | Infantis | GCA 3118475.1 | D | Enteritidis | GCA 625135.2 |
| B | Typhimurium | GCA 1215105.1 | C1 | Infantis | GCA 3120215.1 | D | Enteritidis | GCA 625155.2 |
| B | Typhimurium | GCA 1217925.1 | C1 | Infantis | GCA 2200365.1 | D | Enteritidis | GCA 625175.2 |
| B | Typhimurium | GCA 2798515.1 | C1 | Infantis | GCA 2200415.1 | D | Enteritidis | GCA 625195.2 |
| B | Typhimurium | GCA 2798715.1 | C1 | Infantis | GCA 1691885.1 | D | Enteritidis | GCA 625215.2 |
| B | Typhimurium | GCA 2809915.1 | C1 | Infantis | GCA 1242165.1 | D | Enteritidis | GCA 625235.2 |
| B | Typhimurium | GCA 1295625.1 | C1 | Infantis | GCA 3117335.1 | D | Enteritidis | GCA 625255.2 |
| B | Typhimurium | GCA 474395.1  | C1 | Infantis | GCA 3118825.1 | D | Enteritidis | GCA 625275.2 |
| B | Typhimurium | GCA 1457365.1 | C1 | Infantis | GCA 2200325.1 | D | Enteritidis | GCA 625295.2 |
| B | Typhimurium | GCA 1480985.1 | C1 | Infantis | GCA 1970975.1 | D | Enteritidis | GCA 625315.2 |
| B | Typhimurium | GCA 1594795.1 | C1 | Infantis | GCA 3118555.1 | D | Enteritidis | GCA 625335.2 |
| B | Typhimurium | GCA 3119175.1 | C1 | Infantis | GCA 3119595.1 | D | Enteritidis | GCA 625355.2 |
| B | Typhimurium | GCA 1218445.1 | C1 | Infantis | GCA 1951755.1 | D | Enteritidis | GCA 625375.2 |
| B | Typhimurium | GCA 1219485.1 | C1 | Infantis | GCA 2200405.1 | D | Enteritidis | GCA 625395.2 |

|   |             |               |    |          |               |   |             |               |
|---|-------------|---------------|----|----------|---------------|---|-------------|---------------|
| B | Typhimurium | GCA 2029455.1 | C1 | Infantis | GCA 2200675.1 | D | Enteritidis | GCA 625415.2  |
| B | Typhimurium | GCA 2798795.1 | C1 | Infantis | GCA 1242985.1 | D | Enteritidis | GCA 625435.2  |
| B | Typhimurium | GCA 2031955.1 | C1 | Infantis | GCA 1970985.1 | D | Enteritidis | GCA 625455.2  |
| B | Typhimurium | GCA 1215145.1 | C1 | Infantis | GCA 1244805.1 | D | Enteritidis | GCA 625475.2  |
| B | Typhimurium | GCA 1221265.1 | C1 | Infantis | GCA 3119435.1 | D | Enteritidis | GCA 625495.2  |
| B | Typhimurium | GCA 1223205.1 | C1 | Infantis | GCA 3120895.1 | D | Enteritidis | GCA 625515.2  |
| B | Typhimurium | GCA 1566115.1 | C1 | Infantis | GCA 2064835.1 | D | Enteritidis | GCA 625535.2  |
| B | Typhimurium | GCA 2074435.1 | C1 | Infantis | GCA 3119395.1 | D | Enteritidis | GCA 625555.2  |
| B | Typhimurium | GCA 1271825.1 | C1 | Infantis | GCA 1243785.1 | D | Enteritidis | GCA 625575.2  |
| B | Typhimurium | GCA 1326275.1 | C1 | Infantis | GCA 1951675.1 | D | Enteritidis | GCA 625595.2  |
| B | Typhimurium | GCA 1594445.1 | C1 | Infantis | GCA 1970965.1 | D | Enteritidis | GCA 625615.2  |
| B | Typhimurium | GCA 1594765.1 | C1 | Infantis | GCA 1951685.1 | D | Enteritidis | GCA 625635.2  |
| B | Typhimurium | GCA 1594875.1 | C1 | Infantis | GCA 1442695.1 | D | Enteritidis | GCA 625655.2  |
| B | Typhimurium | GCA 2032435.1 | C1 | Infantis | GCA 1478785.1 | D | Enteritidis | GCA 625675.2  |
| B | Typhimurium | GCA 3120815.1 | C1 | Infantis | GCA 2064905.1 | D | Enteritidis | GCA 625695.2  |
| B | Typhimurium | GCA 1215365.1 | C1 | Infantis | GCA 1906525.1 | D | Enteritidis | GCA 625715.2  |
| B | Typhimurium | GCA 1217205.1 | C1 | Infantis | GCA 2032265.1 | D | Enteritidis | GCA 625735.2  |
| B | Typhimurium | GCA 1218345.1 | C1 | Infantis | GCA 2110505.1 | D | Enteritidis | GCA 625755.2  |
| B | Typhimurium | GCA 2029385.1 | C1 | Infantis | GCA 2110515.1 | D | Enteritidis | GCA 625775.2  |
| B | Typhimurium | GCA 2798755.1 | C1 | Infantis | GCA 3077385.1 | D | Enteritidis | GCA 625795.2  |
| B | Typhimurium | GCA 1480025.1 | C1 | Infantis | GCA 1479785.1 | D | Enteritidis | GCA 625815.2  |
| B | Typhimurium | GCA 1594715.1 | C1 | Infantis | GCA 2059795.1 | D | Enteritidis | GCA 625835.2  |
| B | Typhimurium | GCA 1221385.1 | C1 | Infantis | GCA 2107195.1 | D | Enteritidis | GCA 625875.2  |
| B | Typhimurium | GCA 1246565.1 | C1 | Infantis | GCA 2200805.1 | D | Enteritidis | GCA 625895.2  |
| B | Typhimurium | GCA 1271505.1 | C1 | Infantis | GCA 1241325.1 | D | Enteritidis | GCA 625915.2  |
| B | Typhimurium | GCA 1756025.1 | C1 | Infantis | GCA 1242185.1 | D | Enteritidis | GCA 625935.2  |
| B | Typhimurium | GCA 3117055.1 | C1 | Infantis | GCA 506925.1  | D | Enteritidis | GCA 625955.2  |
| B | Typhimurium | GCA 1220405.1 | C1 | Infantis | GCA 3119315.1 | D | Enteritidis | GCA 625975.2  |
| B | Typhimurium | GCA 1220725.1 | C1 | Infantis | GCA 3119255.1 | D | Enteritidis | GCA 625995.2  |
| B | Typhimurium | GCA 1220905.1 | C1 | Infantis | GCA 2200555.1 | D | Enteritidis | GCA 626015.2  |
| B | Typhimurium | GCA 1221845.1 | C1 | Infantis | GCA 506945.1  | D | Enteritidis | GCA 626035.2  |
| B | Typhimurium | GCA 1566155.1 | C1 | Infantis | GCA 1478585.1 | D | Enteritidis | GCA 626055.2  |
| B | Typhimurium | GCA 474555.1  | C1 | Infantis | GCA 2059955.1 | D | Enteritidis | GCA 626075.2  |
| B | Typhimurium | GCA 1220205.1 | C1 | Infantis | GCA 3120775.1 | D | Enteritidis | GCA 626115.2  |
| B | Typhimurium | GCA 1245415.1 | C1 | Infantis | GCA 2065585.1 | D | Enteritidis | GCA 626135.2  |
| B | Typhimurium | GCA 1756215.1 | C1 | Infantis | GCA 812595.1  | D | Enteritidis | GCA 626155.2  |
| B | Typhimurium | GCA 1214705.1 | C1 | Bareilly | GCA 1707735.1 | D | Enteritidis | GCA 626395.2  |
| B | Typhimurium | GCA 1214765.1 | C1 | Bareilly | GCA 832685.1  | D | Enteritidis | GCA 626415.2  |
| B | Typhimurium | GCA 1216645.1 | C1 | Bareilly | GCA 1834255.1 | D | Enteritidis | GCA 626435.2  |
| B | Typhimurium | GCA 1217965.1 | C1 | Bareilly | GCA 487355.1  | D | Enteritidis | GCA 626455.1  |
| B | Typhimurium | GCA 1218245.1 | C1 | Bareilly | GCA 1834225.1 | D | Enteritidis | GCA 626475.2  |
| B | Typhimurium | GCA 1218465.1 | C1 | Bareilly | GCA 487415.1  | D | Enteritidis | GCA 626495.2  |
| B | Typhimurium | GCA 1220125.1 | C1 | Bareilly | GCA 1833665.1 | D | Enteritidis | GCA 626515.2  |
| B | Typhimurium | GCA 1220705.1 | C1 | Bareilly | GCA 1835125.1 | D | Enteritidis | GCA 626535.2  |
| B | Typhimurium | GCA 1222185.1 | C1 | Bareilly | GCA 1834405.1 | D | Enteritidis | GCA 626555.2  |
| B | Typhimurium | GCA 1223185.1 | C1 | Bareilly | GCA 1834415.1 | D | Enteritidis | GCA 831025.2  |
| B | Typhimurium | GCA 2798565.1 | C1 | Bareilly | GCA 1835285.1 | D | Enteritidis | GCA 831045.2  |
| B | Typhimurium | GCA 1241605.1 | C1 | Bareilly | GCA 1832745.1 | D | Enteritidis | GCA 968775.2  |
| B | Typhimurium | GCA 1241905.1 | C1 | Bareilly | GCA 2066135.1 | D | Enteritidis | GCA 968795.2  |
| B | Typhimurium | GCA 1245495.1 | C1 | Bareilly | GCA 1835385.1 | D | Enteritidis | GCA 626315.1  |
| B | Typhimurium | GCA 2059555.1 | C1 | Bareilly | GCA 747885.1  | D | Enteritidis | GCA 2760915.1 |
| B | Typhimurium | GCA 1215725.1 | C1 | Bareilly | GCA 748565.1  | D | Enteritidis | GCA 2760935.1 |
| B | Typhimurium | GCA 1218885.1 | C1 | Bareilly | GCA 749085.1  | D | Enteritidis | GCA 2761055.1 |
| B | Typhimurium | GCA 1219305.1 | C1 | Bareilly | GCA 749435.1  | D | Enteritidis | GCA 2761075.1 |
| B | Typhimurium | GCA 1219685.1 | C1 | Bareilly | GCA 698715.1  | D | Enteritidis | GCA 2761115.1 |
| B | Typhimurium | GCA 1220285.1 | C1 | Bareilly | GCA 749005.1  | D | Enteritidis | GCA 2813975.1 |
| B | Typhimurium | GCA 1220965.1 | C1 | Bareilly | GCA 748505.1  | D | Enteritidis | GCA 2813995.1 |
| B | Typhimurium | GCA 1221345.1 | C1 | Bareilly | GCA 698635.1  | D | Enteritidis | GCA 3031995.1 |
| B | Typhimurium | GCA 1221545.1 | C1 | Bareilly | GCA 2063005.1 | D | Enteritidis | GCA 2761095.1 |
| B | Typhimurium | GCA 1221945.1 | C1 | Bareilly | GCA 747965.1  | D | Enteritidis | GCA 2761135.1 |
| B | Typhimurium | GCA 1222785.1 | C1 | Bareilly | GCA 748925.1  | D | Enteritidis | GCA 2761155.1 |
| B | Typhimurium | GCA 1223285.1 | C1 | Bareilly | GCA 747905.1  | D | Enteritidis | GCA 3032035.1 |
| B | Typhimurium | GCA 1220425.1 | C1 | Bareilly | GCA 748225.1  | D | Enteritidis | GCA 3184325.1 |
| B | Typhimurium | GCA 1221665.1 | C1 | Bareilly | GCA 748905.1  | D | Enteritidis | GCA 3184425.1 |
| B | Typhimurium | GCA 1240805.1 | C1 | Bareilly | GCA 749195.1  | D | Enteritidis | GCA 2284635.1 |
| B | Typhimurium | GCA 1244105.1 | C1 | Bareilly | GCA 748105.1  | D | Enteritidis | GCA 2528955.1 |
| B | Typhimurium | GCA 1246705.1 | C1 | Bareilly | GCA 748065.1  | D | Enteritidis | GCA 2907005.1 |
| B | Typhimurium | GCA 3186325.1 | C1 | Bareilly | GCA 748525.1  | D | Enteritidis | GCA 2914455.1 |
| B | Typhimurium | GCA 1215765.1 | C1 | Bareilly | GCA 748845.1  | D | Enteritidis | GCA 2914485.1 |
| B | Typhimurium | GCA 1217085.1 | C1 | Bareilly | GCA 748245.1  | D | Enteritidis | GCA 2529025.1 |
| B | Typhimurium | GCA 1217625.1 | C1 | Bareilly | GCA 748325.1  | D | Enteritidis | GCA 2914435.1 |

|   |             |               |    |            |               |   |             |               |
|---|-------------|---------------|----|------------|---------------|---|-------------|---------------|
| B | Typhimurium | GCA 1217845.1 | C1 | Bareilly   | GCA 748345.1  | D | Enteritidis | GCA 2908955.1 |
| B | Typhimurium | GCA 1218365.1 | C1 | Bareilly   | GCA 748365.1  | D | Enteritidis | GCA 2908995.1 |
| B | Typhimurium | GCA 1221245.1 | C1 | Bareilly   | GCA 748465.1  | D | Enteritidis | GCA 2908975.1 |
| B | Typhimurium | GCA 1221745.1 | C1 | Bareilly   | GCA 748145.1  | D | Enteritidis | GCA 2528945.1 |
| B | Typhimurium | GCA 1221785.1 | C1 | Bareilly   | GCA 439415.1  | D | Enteritidis | GCA 2909015.1 |
| B | Typhimurium | GCA 1222465.1 | C1 | Bareilly   | GCA 3121015.1 | D | Enteritidis | GCA 2906965.1 |
| B | Typhimurium | GCA 1326195.1 | C1 | Bareilly   | GCA 748865.1  | D | Enteritidis | GCA 1973025.1 |
| B | Typhimurium | GCA 1243255.1 | C1 | Bareilly   | GCA 747835.1  | D | Enteritidis | GCA 1973065.1 |
| B | Typhimurium | GCA 1244385.1 | C1 | Bareilly   | GCA 748265.1  | D | Enteritidis | GCA 1713755.1 |
| B | Typhimurium | GCA 1594695.1 | C1 | Bareilly   | GCA 698675.1  | D | Enteritidis | GCA 1713875.1 |
| B | Typhimurium | GCA 2035025.1 | C1 | Bareilly   | GCA 747845.1  | D | Enteritidis | GCA 1972945.1 |
| B | Typhimurium | GCA 3118275.1 | C1 | Bareilly   | GCA 748185.1  | D | Enteritidis | GCA 1973705.1 |
| B | Typhimurium | GCA 1215865.1 | C1 | Bareilly   | GCA 748305.1  | D | Enteritidis | GCA 1973755.1 |
| B | Typhimurium | GCA 1217305.1 | C1 | Bareilly   | GCA 749215.1  | D | Enteritidis | GCA 2039215.1 |
| B | Typhimurium | GCA 1217585.1 | C1 | Bareilly   | GCA 749255.1  | D | Enteritidis | GCA 1713785.1 |
| B | Typhimurium | GCA 1218425.1 | C1 | Bareilly   | GCA 749045.1  | D | Enteritidis | GCA 1713905.1 |
| B | Typhimurium | GCA 1218825.1 | C1 | Bareilly   | GCA 749455.1  | D | Enteritidis | GCA 1972545.1 |
| B | Typhimurium | GCA 1218845.1 | C1 | Bareilly   | GCA 412895.1  | D | Enteritidis | GCA 1972725.1 |
| B | Typhimurium | GCA 1219365.1 | C1 | Bareilly   | GCA 487455.1  | D | Enteritidis | GCA 1972815.1 |
| B | Typhimurium | GCA 1219765.1 | C1 | Bareilly   | GCA 698695.2  | D | Enteritidis | GCA 1972915.1 |
| B | Typhimurium | GCA 1219945.1 | C1 | Bareilly   | GCA 748725.1  | D | Enteritidis | GCA 1972995.1 |
| B | Typhimurium | GCA 1221005.1 | C1 | Bareilly   | GCA 749145.1  | D | Enteritidis | GCA 1973035.1 |
| B | Typhimurium | GCA 1221685.1 | C1 | Bareilly   | GCA 748165.1  | D | Enteritidis | GCA 1973265.1 |
| B | Typhimurium | GCA 1222605.1 | C1 | Bareilly   | GCA 749275.1  | D | Enteritidis | GCA 1973345.1 |
| B | Typhimurium | GCA 1326235.1 | C1 | Bareilly   | GCA 749505.1  | D | Enteritidis | GCA 1973665.1 |
| B | Typhimurium | GCA 444835.2  | C1 | Bareilly   | GCA 748405.1  | D | Enteritidis | GCA 1973725.1 |
| B | Typhimurium | GCA 1478325.1 | C1 | Bareilly   | GCA 748045.1  | D | Enteritidis | GCA 2041945.1 |
| B | Typhimurium | GCA 1480855.1 | C1 | Bareilly   | GCA 293075.1  | D | Enteritidis | GCA 1597875.1 |
| B | Typhimurium | GCA 973845.1  | C1 | Bareilly   | GCA 748945.1  | D | Enteritidis | GCA 1713825.1 |
| B | Typhimurium | GCA 1216565.1 | C1 | Bareilly   | GCA 747825.1  | D | Enteritidis | GCA 1713915.1 |
| B | Typhimurium | GCA 1216785.1 | C1 | Bareilly   | GCA 749065.1  | D | Enteritidis | GCA 1972635.1 |
| B | Typhimurium | GCA 1217985.1 | C1 | Bareilly   | GCA 748205.1  | D | Enteritidis | GCA 1972645.1 |
| B | Typhimurium | GCA 1218965.1 | C1 | Bareilly   | GCA 748025.1  | D | Enteritidis | GCA 1972795.1 |
| B | Typhimurium | GCA 1219225.1 | C1 | Bareilly   | GCA 748665.1  | D | Enteritidis | GCA 1972875.1 |
| B | Typhimurium | GCA 1219725.1 | C1 | Bareilly   | GCA 749295.1  | D | Enteritidis | GCA 1972955.1 |
| B | Typhimurium | GCA 1221885.1 | C1 | Bareilly   | GCA 749125.1  | D | Enteritidis | GCA 1973085.1 |
| B | Typhimurium | GCA 1222405.1 | C1 | Bareilly   | GCA 758005.1  | D | Enteritidis | GCA 1973195.1 |
| B | Typhimurium | GCA 1223545.1 | C1 | Bareilly   | GCA 748285.1  | D | Enteritidis | GCA 1973245.1 |
| B | Typhimurium | GCA 1997115.1 | C1 | Bareilly   | GCA 749105.1  | D | Enteritidis | GCA 1973305.1 |
| B | Typhimurium | GCA 2798625.1 | C1 | Bareilly   | GCA 749415.1  | D | Enteritidis | GCA 1973325.1 |
| B | Typhimurium | GCA 1223525.1 | C1 | Bareilly   | GCA 487435.1  | D | Enteritidis | GCA 1973585.1 |
| B | Typhimurium | GCA 1246695.1 | C1 | Bareilly   | GCA 748085.1  | D | Enteritidis | GCA 1973595.1 |
| B | Typhimurium | GCA 1480385.1 | C1 | Bareilly   | GCA 698535.1  | D | Enteritidis | GCA 1973625.1 |
| B | Typhimurium | GCA 1594435.1 | C1 | Bareilly   | GCA 747945.1  | D | Enteritidis | GCA 1973645.1 |
| B | Typhimurium | GCA 3054755.1 | C1 | Bareilly   | GCA 748445.1  | D | Enteritidis | GCA 1973745.1 |
| B | Typhimurium | GCA 1215525.1 | C1 | Bareilly   | GCA 748485.1  | D | Enteritidis | GCA 1973785.1 |
| B | Typhimurium | GCA 1216345.1 | C1 | Bareilly   | GCA 747985.1  | D | Enteritidis | GCA 1973805.1 |
| B | Typhimurium | GCA 1216545.1 | C1 | Bareilly   | GCA 749315.1  | D | Enteritidis | GCA 2065805.1 |
| B | Typhimurium | GCA 1218025.1 | C1 | Bareilly   | GCA 748585.1  | D | Enteritidis | GCA 2038025.1 |
| B | Typhimurium | GCA 1218065.1 | C1 | Bareilly   | GCA 748825.1  | D | Enteritidis | GCA 2040065.1 |
| B | Typhimurium | GCA 1219565.1 | C1 | Bareilly   | GCA 748985.1  | D | Enteritidis | GCA 2040805.1 |
| B | Typhimurium | GCA 1219985.1 | C1 | Bareilly   | GCA 748005.1  | D | Enteritidis | GCA 2041245.1 |
| B | Typhimurium | GCA 1220685.1 | C1 | Bareilly   | GCA 748385.1  | D | Enteritidis | GCA 1714075.1 |
| B | Typhimurium | GCA 1220885.1 | C1 | Bareilly   | GCA 748765.1  | D | Enteritidis | GCA 1972905.1 |
| B | Typhimurium | GCA 1222225.1 | C1 | Bareilly   | GCA 748705.1  | D | Enteritidis | GCA 1973355.1 |
| B | Typhimurium | GCA 1222765.1 | C1 | Bareilly   | GCA 748645.1  | D | Enteritidis | GCA 1973565.1 |
| B | Typhimurium | GCA 312745.2  | C1 | Bareilly   | GCA 757925.1  | D | Enteritidis | GCA 3186065.1 |
| B | Typhimurium | GCA 1222085.1 | C1 | Bareilly   | GCA 698515.1  | D | Enteritidis | GCA 2038305.1 |
| B | Typhimurium | GCA 1244255.1 | C1 | Bareilly   | GCA 749025.1  | D | Enteritidis | GCA 2038485.1 |
| B | Typhimurium | GCA 1244285.1 | C1 | Bareilly   | GCA 748965.1  | D | Enteritidis | GCA 2039105.1 |
| B | Typhimurium | GCA 1246225.1 | C1 | Montevideo | GCA 1692045.1 | D | Enteritidis | GCA 2039185.1 |
| B | Typhimurium | GCA 1271565.1 | C1 | Montevideo | GCA 1691975.1 | D | Enteritidis | GCA 2039705.1 |
| B | Typhimurium | GCA 1272465.1 | C1 | Montevideo | GCA 189075.2  | D | Enteritidis | GCA 2040135.1 |
| B | Typhimurium | GCA 1295525.1 | C1 | Montevideo | GCA 1707585.1 | D | Enteritidis | GCA 2040155.1 |
| B | Typhimurium | GCA 1758525.1 | C1 | Montevideo | GCA 189055.2  | D | Enteritidis | GCA 2040525.1 |
| B | Typhimurium | GCA 2028525.1 | C1 | Montevideo | GCA 188435.2  | D | Enteritidis | GCA 2042325.1 |
| B | Typhimurium | GCA 2035445.1 | C1 | Montevideo | GCA 189095.2  | D | Enteritidis | GCA 2042375.1 |
| B | Typhimurium | GCA 1215665.1 | C1 | Montevideo | GCA 188615.2  | D | Enteritidis | GCA 2042855.1 |
| B | Typhimurium | GCA 1218225.1 | C1 | Montevideo | GCA 188635.2  | D | Enteritidis | GCA 280235.1  |
| B | Typhimurium | GCA 1219045.1 | C1 | Montevideo | GCA 242795.2  | D | Enteritidis | GCA 1713985.1 |
| B | Typhimurium | GCA 1220245.1 | C1 | Montevideo | GCA 188375.2  | D | Enteritidis | GCA 1972625.1 |

|   |             |                 |    |            |               |   |             |               |
|---|-------------|-----------------|----|------------|---------------|---|-------------|---------------|
| B | Typhimurium | GCA 1222665.1   | C1 | Montevideo | GCA 188555.2  | D | Enteritidis | GCA 1972715.1 |
| B | Typhimurium | GCA 1223165.1   | C1 | Montevideo | GCA 189115.2  | D | Enteritidis | GCA 1972865.1 |
| B | Typhimurium | GCA 1565975.1   | C1 | Montevideo | GCA 188415.2  | D | Enteritidis | GCA 1972985.1 |
| B | Typhimurium | GCA 1566095.1   | C1 | Montevideo | GCA 240865.2  | D | Enteritidis | GCA 1973115.1 |
| B | Typhimurium | GCA 1215505.1   | C1 | Montevideo | GCA 240845.2  | D | Enteritidis | GCA 1973165.1 |
| B | Typhimurium | GCA 1217045.1   | C1 | Montevideo | GCA 189215.2  | D | Enteritidis | GCA 1973385.1 |
| B | Typhimurium | GCA 1223345.1   | C1 | Montevideo | GCA 188395.2  | D | Enteritidis | GCA 1973675.1 |
| B | Typhimurium | GCA 1241165.1   | C1 | Montevideo | GCA 188575.2  | D | Enteritidis | GCA 2037885.1 |
| B | Typhimurium | GCA 1243815.1   | C1 | Montevideo | GCA 188595.2  | D | Enteritidis | GCA 2038885.1 |
| B | Typhimurium | GCA 1246875.1   | C1 | Montevideo | GCA 1246955.1 | D | Enteritidis | GCA 2039045.1 |
| B | Typhimurium | GCA 1295745.1   | C1 | Montevideo | GCA 1245015.1 | D | Enteritidis | GCA 2039125.1 |
| B | Typhimurium | GCA 2033065.1   | C1 | Montevideo | GCA 188335.2  | D | Enteritidis | GCA 2039335.1 |
| B | Typhimurium | GCA 1216465.1   | C1 | Montevideo | GCA 240785.2  | D | Enteritidis | GCA 2039385.1 |
| B | Typhimurium | GCA 1217025.1   | C1 | Montevideo | GCA 240825.2  | D | Enteritidis | GCA 2039485.1 |
| B | Typhimurium | GCA 1218925.1   | C1 | Montevideo | GCA 2037075.1 | D | Enteritidis | GCA 2039525.1 |
| B | Typhimurium | GCA 1219065.1   | C1 | Montevideo | GCA 188355.2  | D | Enteritidis | GCA 2039565.1 |
| B | Typhimurium | GCA 1220225.1   | C1 | Montevideo | GCA 2034305.1 | D | Enteritidis | GCA 2039625.1 |
| B | Typhimurium | GCA 1221565.1   | C1 | Montevideo | GCA 188995.2  | D | Enteritidis | GCA 2040205.1 |
| B | Typhimurium | GCA 1222325.1   | C1 | Montevideo | GCA 238515.2  | D | Enteritidis | GCA 2041095.1 |
| B | Typhimurium | GCA 1222525.1   | C1 | Montevideo | GCA 1272295.1 | D | Enteritidis | GCA 2042145.1 |
| B | Typhimurium | GCA 1223025.1   | C1 | Montevideo | GCA 2065395.1 | D | Enteritidis | GCA 2042405.1 |
| B | Typhimurium | GCA 1326135.1   | C1 | Montevideo | GCA 238555.2  | D | Enteritidis | GCA 2042485.1 |
| B | Typhimurium | GCA 1217645.1   | C1 | Montevideo | GCA 240885.2  | D | Enteritidis | GCA 329325.1  |
| B | Typhimurium | GCA 1241505.1   | C1 | Montevideo | GCA 486895.1  | D | Enteritidis | GCA 1714015.1 |
| B | Typhimurium | GCA 1243105.1   | C1 | Montevideo | GCA 2066305.1 | D | Enteritidis | GCA 1972565.1 |
| B | Typhimurium | GCA 1272045.1   | C1 | Montevideo | GCA 188535.2  | D | Enteritidis | GCA 1972735.1 |
| B | Typhimurium | GCA 1477895.1   | C1 | Montevideo | GCA 188955.5  | D | Enteritidis | GCA 1973425.1 |
| B | Typhimurium | GCA 1478285.1   | C1 | Montevideo | GCA 940975.1  | D | Enteritidis | GCA 1973475.1 |
| B | Typhimurium | GCA 3120675.1   | C1 | Montevideo | GCA 973665.2  | D | Enteritidis | GCA 2041145.1 |
| B | Typhimurium | GCA 1216085.1   | C1 | Montevideo | GCA 3054535.1 | D | Enteritidis | GCA 3067625.1 |
| B | Typhimurium | GCA 1216125.1   | C1 | Montevideo | GCA 3073575.1 | D | Enteritidis | GCA 3067665.1 |
| B | Typhimurium | GCA 1216385.1   | C1 | Montevideo | GCA 3130605.1 | D | Enteritidis | GCA 2038055.1 |
| B | Typhimurium | GCA 1218505.1   | C1 | Montevideo | GCA 3071485.1 | D | Enteritidis | GCA 2038505.1 |
| B | Typhimurium | GCA 1218785.1   | C1 | Montevideo | GCA 3118775.1 | D | Enteritidis | GCA 2038805.1 |
| B | Typhimurium | GCA 1220345.1   | C1 | Montevideo | GCA 3121095.1 | D | Enteritidis | GCA 2039145.1 |
| B | Typhimurium | GCA 1220385.1   | C1 | Montevideo | GCA 188655.2  | D | Enteritidis | GCA 2039805.1 |
| B | Typhimurium | GCA 1221285.1   | C1 | Montevideo | GCA 3119695.1 | D | Enteritidis | GCA 2039865.1 |
| B | Typhimurium | GCA 1221485.1   | C1 | Montevideo | GCA 3078695.1 | D | Enteritidis | GCA 2040145.1 |
| B | Typhimurium | GCA 1222585.1   | C1 | Montevideo | GCA 238495.2  | D | Enteritidis | GCA 1713955.1 |
| B | Typhimurium | GCA 1222885.1   | C1 | Montevideo | GCA 1241855.1 | D | Enteritidis | GCA 1972705.1 |
| B | Typhimurium | GCA 1223445.1   | C1 | Montevideo | GCA 1276905.1 | D | Enteritidis | GCA 1973185.1 |
| B | Typhimurium | GCA 1326155.1   | C1 | Montevideo | GCA 1478915.1 | D | Enteritidis | GCA 1973405.1 |
| B | Typhimurium | GCA 2798525.1   | C1 | Montevideo | GCA 3078975.1 | D | Enteritidis | GCA 1973505.1 |
| B | Typhimurium | GCA 2798615.1   | C1 | Montevideo | GCA 188515.2  | D | Enteritidis | GCA 1973545.1 |
| B | Typhimurium | GCA 1240925.1   | C1 | Montevideo | GCA 189235.2  | D | Enteritidis | GCA 1997445.1 |
| B | Typhimurium | GCA 1240975.1   | C1 | Montevideo | GCA 1480465.1 | D | Enteritidis | GCA 2041035.1 |
| B | Typhimurium | GCA 1272035.1   | C1 | Montevideo | GCA 238435.2  | D | Enteritidis | GCA 2037835.1 |
| B | Typhimurium | GCA 1480115.1   | C1 | Montevideo | GCA 238475.2  | D | Enteritidis | GCA 2037905.1 |
| B | Typhimurium | GCA 1481075.1   | C1 | Montevideo | GCA 1276695.1 | D | Enteritidis | GCA 2038035.1 |
| B | Typhimurium | GCA 2056945.1   | C1 | Montevideo | GCA 238455.2  | D | Enteritidis | GCA 2038105.1 |
| B | Typhimurium | GCA 3120695.1   | C1 | Montevideo | GCA 189155.2  | D | Enteritidis | GCA 2038525.1 |
| B | Typhimurium | GCA 1219165.1   | C1 | Montevideo | GCA 188915.2  | D | Enteritidis | GCA 2039265.1 |
| B | Typhimurium | GCA 1219825.1   | C1 | Montevideo | GCA 188475.2  | D | Enteritidis | GCA 2040705.1 |
| B | Typhimurium | GCA 1219905.1   | C1 | Montevideo | GCA 188935.2  | D | Enteritidis | GCA 2040975.1 |
| B | Typhimurium | GCA 1221585.1   | C1 | Montevideo | GCA 188895.2  | D | Enteritidis | GCA 2041085.1 |
| B | Typhimurium | GCA 1221925.1   | C1 | Montevideo | GCA 189135.2  | D | Enteritidis | GCA 2041305.1 |
| B | Typhimurium | GCA 1222025.1   | C1 | Montevideo | GCA 188495.2  | D | Enteritidis | GCA 2041695.1 |
| B | Typhimurium | GCA 1566035.1   | C1 | Montevideo | GCA 189195.2  | D | Enteritidis | GCA 2042065.1 |
| B | Typhimurium | GCA 486105.1    | C1 | Montevideo | GCA 335975.1  | D | Enteritidis | GCA 2042305.1 |
| B | Typhimurium | GCA 1218665.1   | C1 | Montevideo | GCA 188455.2  | D | Enteritidis | GCA 2042635.1 |
| B | Typhimurium | GCA 1221025.1   | C1 | Montevideo | GCA 1245115.1 | D | Enteritidis | GCA 2042665.1 |
| B | Typhimurium | GCA 1240935.1   | C1 | Montevideo | GCA 2061225.1 | D | Enteritidis | GCA 1271675.1 |
| B | Typhimurium | GCA 1240965.1   | C1 | Montevideo | GCA 240805.2  | D | Enteritidis | GCA 1713855.1 |
| B | Typhimurium | GCA 1478425.1   | C1 | Montevideo | GCA 189175.2  | D | Enteritidis | GCA 2034885.1 |
| B | Typhimurium | GCA 1478885.1   | C1 | Montevideo | GCA 188975.2  | D | Enteritidis | GCA 3067645.1 |
| B | Typhimurium | GCA 1595225.1   | C1 | Montevideo | GCA 189015.2  | D | Enteritidis | GCA 3067685.1 |
| B | Typhimurium | GCA 900003165.1 | C1 | Montevideo | GCA 238535.2  | D | Enteritidis | GCA 1691665.1 |
| B | Typhimurium | GCA 973885.1    | C1 | Montevideo | GCA 189035.2  | D | Enteritidis | GCA 2037945.1 |
| B | Typhimurium | GCA 1216765.1   | C1 | Tennessee  | GCA 353585.1  | D | Enteritidis | GCA 2037995.1 |
| B | Typhimurium | GCA 1217245.1   | C1 | Tennessee  | GCA 1974765.1 | D | Enteritidis | GCA 2038185.1 |
| B | Typhimurium | GCA 1218145.1   | C1 | Tennessee  | GCA 1620735.1 | D | Enteritidis | GCA 2038385.1 |



|   |             |               |    |           |               |   |             |               |
|---|-------------|---------------|----|-----------|---------------|---|-------------|---------------|
| B | Typhimurium | GCA 1218725.1 | C1 | Tennessee | GCA 1620755.2 | D | Enteritidis | GCA 2038455.1 |
| B | Typhimurium | GCA 1219205.1 | C1 | Tennessee | GCA 1630165.1 | D | Enteritidis | GCA 2038555.1 |
| B | Typhimurium | GCA 1219445.1 | C1 | Tennessee | GCA 1630295.1 | D | Enteritidis | GCA 2038915.1 |
| B | Typhimurium | GCA 1219545.1 | C1 | Tennessee | GCA 1620725.1 | D | Enteritidis | GCA 2038945.1 |
| B | Typhimurium | GCA 1219885.1 | C1 | Tennessee | GCA 1630225.1 | D | Enteritidis | GCA 2039165.1 |
| B | Typhimurium | GCA 1223245.1 | C1 | Tennessee | GCA 1535365.1 | D | Enteritidis | GCA 2039325.1 |
| B | Typhimurium | GCA 1223365.1 | C1 | Tennessee | GCA 1276665.1 | D | Enteritidis | GCA 2039395.1 |
| B | Typhimurium | GCA 1326175.1 | C1 | Tennessee | GCA 1620405.1 | D | Enteritidis | GCA 2039645.1 |
| B | Typhimurium | GCA 614485.1  | C1 | Tennessee | GCA 1276675.1 | D | Enteritidis | GCA 2039665.1 |
| B | Typhimurium | GCA 319795.2  | C1 | Tennessee | GCA 1620865.1 | D | Enteritidis | GCA 2039785.1 |
| B | Typhimurium | GCA 1219265.1 | C1 | Tennessee | GCA 1620425.1 | D | Enteritidis | GCA 2040005.1 |
| B | Typhimurium | GCA 1480105.1 | C1 | Tennessee | GCA 1620505.1 | D | Enteritidis | GCA 2040465.1 |
| B | Typhimurium | GCA 1480285.1 | C1 | Tennessee | GCA 1630145.1 | D | Enteritidis | GCA 2040845.1 |
| B | Typhimurium | GCA 2035045.1 | C1 | Tennessee | GCA 1630135.1 | D | Enteritidis | GCA 2041165.1 |
| B | Typhimurium | GCA 3120735.1 | C1 | Tennessee | GCA 1620565.1 | D | Enteritidis | GCA 2041325.1 |
| B | Typhimurium | GCA 1218085.1 | C1 | Tennessee | GCA 1535245.1 | D | Enteritidis | GCA 2041445.1 |
| B | Typhimurium | GCA 1218105.1 | C1 | Tennessee | GCA 336175.1  | D | Enteritidis | GCA 2041465.1 |
| B | Typhimurium | GCA 1218565.1 | C1 | Tennessee | GCA 1620665.1 | D | Enteritidis | GCA 2042535.1 |
| B | Typhimurium | GCA 1219025.1 | C1 | Tennessee | GCA 1534835.1 | D | Enteritidis | GCA 329265.1  |
| B | Typhimurium | GCA 1219585.1 | C1 | Tennessee | GCA 1620835.1 | D | Enteritidis | GCA 1245355.1 |
| B | Typhimurium | GCA 1219705.1 | C1 | Tennessee | GCA 1620435.1 | D | Enteritidis | GCA 1272455.1 |
| B | Typhimurium | GCA 1220265.1 | C1 | Tennessee | GCA 1620515.1 | D | Enteritidis | GCA 974045.1  |
| B | Typhimurium | GCA 1220325.1 | C1 | Tennessee | GCA 1620595.1 | D | Enteritidis | GCA 2037865.1 |
| B | Typhimurium | GCA 1220645.1 | C1 | Tennessee | GCA 1620605.1 | D | Enteritidis | GCA 2037895.1 |
| B | Typhimurium | GCA 1221985.1 | C1 | Tennessee | GCA 1620485.1 | D | Enteritidis | GCA 2038155.1 |
| B | Typhimurium | GCA 1222365.1 | C1 | Tennessee | GCA 1276845.1 | D | Enteritidis | GCA 2038285.1 |
| B | Typhimurium | GCA 1223405.1 | C1 | Tennessee | GCA 1630235.1 | D | Enteritidis | GCA 2038395.1 |
| B | Typhimurium | GCA 474495.1  | C1 | Tennessee | GCA 1535445.1 | D | Enteritidis | GCA 2038605.1 |
| B | Typhimurium | GCA 1243095.1 | C1 | Tennessee | GCA 1630215.1 | D | Enteritidis | GCA 2038765.1 |
| B | Typhimurium | GCA 1477805.1 | C1 | Tennessee | GCA 1620585.1 | D | Enteritidis | GCA 2038905.1 |
| B | Typhimurium | GCA 1478445.1 | C1 | Tennessee | GCA 1630255.1 | D | Enteritidis | GCA 2038975.1 |
| B | Typhimurium | GCA 1480055.1 | C1 | Tennessee | GCA 1534825.1 | D | Enteritidis | GCA 2039025.1 |
| B | Typhimurium | GCA 1594425.1 | C1 | Tennessee | GCA 1534905.1 | D | Enteritidis | GCA 2039445.1 |
| B | Typhimurium | GCA 1594665.1 | C1 | Tennessee | GCA 1535415.1 | D | Enteritidis | GCA 2039505.1 |
| B | Typhimurium | GCA 1595195.1 | C1 | Tennessee | GCA 486405.2  | D | Enteritidis | GCA 2039545.1 |
| B | Typhimurium | GCA 2065055.1 | C1 | Tennessee | GCA 1535315.2 | D | Enteritidis | GCA 2039585.1 |
| B | Typhimurium | GCA 2091215.1 | C1 | Tennessee | GCA 2741865.1 | D | Enteritidis | GCA 2040215.1 |
| B | Typhimurium | GCA 1214365.1 | C1 | Tennessee | GCA 2741905.1 | D | Enteritidis | GCA 2040395.1 |
| B | Typhimurium | GCA 1217785.1 | C1 | Tennessee | GCA 3031855.1 | D | Enteritidis | GCA 2040485.1 |
| B | Typhimurium | GCA 1220305.1 | C1 | Tennessee | GCA 3031875.1 | D | Enteritidis | GCA 2040565.1 |
| B | Typhimurium | GCA 1221205.1 | C1 | Tennessee | GCA 1535385.1 | D | Enteritidis | GCA 2040915.1 |
| B | Typhimurium | GCA 1221325.1 | C1 | Tennessee | GCA 173695.1  | D | Enteritidis | GCA 2041125.1 |
| B | Typhimurium | GCA 1221425.1 | C1 | Tennessee | GCA 1534845.1 | D | Enteritidis | GCA 2041205.1 |
| B | Typhimurium | GCA 1222705.1 | C1 | Tennessee | GCA 1620645.1 | D | Enteritidis | GCA 2041265.1 |
| B | Typhimurium | GCA 1223085.1 | C1 | Tennessee | GCA 1535485.1 | D | Enteritidis | GCA 2041535.1 |
| B | Typhimurium | GCA 1223125.1 | C1 | Tennessee | GCA 1620685.1 | D | Enteritidis | GCA 2042075.1 |
| B | Typhimurium | GCA 1565935.1 | C1 | Tennessee | GCA 1535405.1 | D | Enteritidis | GCA 2042685.1 |
| B | Typhimurium | GCA 2798775.1 | C1 | Tennessee | GCA 1620415.1 | D | Enteritidis | GCA 278485.1  |
| B | Typhimurium | GCA 1241515.1 | C1 | Tennessee | GCA 1620705.1 | D | Enteritidis | GCA 329225.1  |
| B | Typhimurium | GCA 1479695.1 | C1 | Tennessee | GCA 1630315.1 | D | Enteritidis | GCA 127215.1  |
| B | Typhimurium | GCA 1594455.1 | C1 | Tennessee | GCA 1630155.1 | D | Enteritidis | GCA 1973105.1 |
| B | Typhimurium | GCA 3119835.1 | C1 | Tennessee | GCA 1620495.1 | D | Enteritidis | GCA 1973465.1 |
| B | Typhimurium | GCA 974215.1  | C1 | Tennessee | GCA 1535025.1 | D | Enteritidis | GCA 2066495.1 |
| B | Typhimurium | GCA 1214745.1 | C1 | Tennessee | GCA 1535455.1 | D | Enteritidis | GCA 2037985.1 |
| B | Typhimurium | GCA 1219085.1 | C1 | Tennessee | GCA 1534985.1 | D | Enteritidis | GCA 2038325.1 |
| B | Typhimurium | GCA 1221225.1 | C1 | Thompson  | GCA 1691965.1 | D | Enteritidis | GCA 2038645.1 |
| B | Typhimurium | GCA 1222245.1 | C1 | Thompson  | GCA 1692105.1 | D | Enteritidis | GCA 2038825.1 |
| B | Typhimurium | GCA 1326255.1 | C1 | Thompson  | GCA 1240525.1 | D | Enteritidis | GCA 2038865.1 |
| B | Typhimurium | GCA 1559855.1 | C1 | Thompson  | GCA 2106065.1 | D | Enteritidis | GCA 2039365.1 |
| B | Typhimurium | GCA 1217865.1 | C1 | Thompson  | GCA 2107385.1 | D | Enteritidis | GCA 2039905.1 |
| B | Typhimurium | GCA 1219125.1 | C1 | Thompson  | GCA 1242585.1 | D | Enteritidis | GCA 2040085.1 |
| B | Typhimurium | GCA 1220025.1 | C1 | Thompson  | GCA 2105905.1 | D | Enteritidis | GCA 2040095.1 |
| B | Typhimurium | GCA 1221185.1 | C1 | Thompson  | GCA 2105955.1 | D | Enteritidis | GCA 2040545.1 |
| B | Typhimurium | GCA 1241555.1 | C1 | Thompson  | GCA 2106795.1 | D | Enteritidis | GCA 2040835.1 |
| B | Typhimurium | GCA 1480225.1 | C1 | Thompson  | GCA 973955.1  | D | Enteritidis | GCA 2041275.1 |
| B | Typhimurium | GCA 1594525.1 | C1 | Thompson  | GCA 2106375.1 | D | Enteritidis | GCA 2041385.1 |
| B | Typhimurium | GCA 1216985.1 | C1 | Thompson  | GCA 2108215.1 | D | Enteritidis | GCA 2041605.1 |
| B | Typhimurium | GCA 1218805.1 | C1 | Thompson  | GCA 2107615.1 | D | Enteritidis | GCA 2041685.1 |
| B | Typhimurium | GCA 1219005.1 | C1 | Thompson  | GCA 2107305.1 | D | Enteritidis | GCA 2041705.1 |
| B | Typhimurium | GCA 1220365.1 | C1 | Thompson  | GCA 1240735.1 | D | Enteritidis | GCA 2042175.1 |
| B | Typhimurium | GCA 1220465.1 | C1 | Thompson  | GCA 1240555.1 | D | Enteritidis | GCA 2042185.1 |

|   |             |                 |    |             |               |   |             |               |
|---|-------------|-----------------|----|-------------|---------------|---|-------------|---------------|
| B | Typhimurium | GCA 1220925.1   | C1 | Thompson    | GCA 2106145.1 | D | Enteritidis | GCA 2042565.1 |
| B | Typhimurium | GCA 1221125.1   | C1 | Thompson    | GCA 2106635.1 | D | Enteritidis | GCA 2042625.1 |
| B | Typhimurium | GCA 1221645.1   | C1 | Thompson    | GCA 2106665.1 | D | Enteritidis | GCA 2042845.1 |
| B | Typhimurium | GCA 1222965.1   | C1 | Thompson    | GCA 2059565.1 | D | Enteritidis | GCA 329245.1  |
| B | Typhimurium | GCA 2798855.1   | C1 | Thompson    | GCA 2059915.1 | D | Enteritidis | GCA 1240265.1 |
| B | Typhimurium | GCA 1217945.1   | C1 | Thompson    | GCA 1478265.1 | D | Enteritidis | GCA 1272485.1 |
| B | Typhimurium | GCA 1480795.1   | C1 | Thompson    | GCA 2106235.1 | D | Enteritidis | GCA 1972785.1 |
| B | Typhimurium | GCA 2091125.1   | C1 | Thompson    | GCA 2062295.1 | D | Enteritidis | GCA 1972835.1 |
| B | Typhimurium | GCA 900002715.1 | C1 | Thompson    | GCA 2061205.1 | D | Enteritidis | GCA 2065725.1 |
| B | Typhimurium | GCA 900002745.1 | C1 | Thompson    | GCA 2063795.1 | D | Enteritidis | GCA 3067605.1 |
| B | Typhimurium | GCA 1218745.1   | C1 | Thompson    | GCA 315995.1  | D | Enteritidis | GCA 2038135.1 |
| B | Typhimurium | GCA 1219425.1   | C1 | Thompson    | GCA 2059885.1 | D | Enteritidis | GCA 2038345.1 |
| B | Typhimurium | GCA 1221305.1   | C1 | Thompson    | GCA 1479545.1 | D | Enteritidis | GCA 2038685.1 |
| B | Typhimurium | GCA 1222165.1   | C1 | Thompson    | GCA 2061345.1 | D | Enteritidis | GCA 2038745.1 |
| B | Typhimurium | GCA 336155.1    | C1 | Thompson    | GCA 473275.1  | D | Enteritidis | GCA 2038965.1 |
| B | Typhimurium | GCA 1478625.1   | C1 | Thompson    | GCA 486365.2  | D | Enteritidis | GCA 2039005.1 |
| B | Typhimurium | GCA 1594535.1   | C1 | Thompson    | GCA 1305815.1 | D | Enteritidis | GCA 2039205.1 |
| B | Typhimurium | GCA 1594585.1   | C1 | Thompson    | GCA 1305835.1 | D | Enteritidis | GCA 2039295.1 |
| B | Typhimurium | GCA 1955215.1   | C1 | Thompson    | GCA 1953015.1 | D | Enteritidis | GCA 2040015.1 |
| B | Typhimurium | GCA 2032705.1   | C1 | Thompson    | GCA 3052785.2 | D | Enteritidis | GCA 2040245.1 |
| B | Typhimurium | GCA 1214485.1   | C1 | Thompson    | GCA 3117275.1 | D | Enteritidis | GCA 2040315.1 |
| B | Typhimurium | GCA 1217425.1   | C1 | Thompson    | GCA 3120165.1 | D | Enteritidis | GCA 2040605.1 |
| B | Typhimurium | GCA 1217705.1   | C1 | Thompson    | GCA 3119225.1 | D | Enteritidis | GCA 2040615.1 |
| B | Typhimurium | GCA 1217825.1   | C1 | Thompson    | GCA 3120605.1 | D | Enteritidis | GCA 2040905.1 |
| B | Typhimurium | GCA 1220545.1   | C1 | Braenderup  | GCA 2234775.1 | D | Enteritidis | GCA 2041545.1 |
| B | Typhimurium | GCA 1221725.1   | C1 | Braenderup  | GCA 1833885.1 | D | Enteritidis | GCA 2041665.1 |
| B | Typhimurium | GCA 1222005.1   | C1 | Braenderup  | GCA 1833895.1 | D | Enteritidis | GCA 2041755.1 |
| B | Typhimurium | GCA 1223045.1   | C1 | Braenderup  | GCA 1245445.1 | D | Enteritidis | GCA 2041835.1 |
| B | Typhimurium | GCA 312845.2    | C1 | Braenderup  | GCA 2059815.1 | D | Enteritidis | GCA 2042245.1 |
| B | Typhimurium | GCA 1244335.1   | C1 | Braenderup  | GCA 487335.1  | D | Enteritidis | GCA 2042725.1 |
| B | Typhimurium | GCA 900002755.1 | C1 | Braenderup  | GCA 487895.1  | D | Enteritidis | GCA 2042755.1 |
| B | Typhimurium | GCA 1217885.1   | C1 | Braenderup  | GCA 1480425.1 | D | Enteritidis | GCA 329125.1  |
| B | Typhimurium | GCA 1220105.1   | C1 | Braenderup  | GCA 1480345.1 | D | Enteritidis | GCA 329145.1  |
| B | Typhimurium | GCA 2798635.1   | C1 | Braenderup  | GCA 2059465.1 | D | Enteritidis | GCA 1240255.1 |
| B | Typhimurium | GCA 1240825.1   | C1 | Braenderup  | GCA 2036245.1 | D | Enteritidis | GCA 1245855.1 |
| B | Typhimurium | GCA 1242275.1   | C1 | Braenderup  | GCA 1245025.1 | D | Enteritidis | GCA 1271485.1 |
| B | Typhimurium | GCA 2091115.1   | C1 | Braenderup  | GCA 3120335.1 | D | Enteritidis | GCA 1479035.1 |
| B | Typhimurium | GCA 900003205.1 | C1 | Braenderup  | GCA 3121275.1 | D | Enteritidis | GCA 1713835.1 |
| B | Typhimurium | GCA 900003365.1 | C1 | Braenderup  | GCA 3117675.1 | D | Enteritidis | GCA 1972575.1 |
| B | Typhimurium | GCA 1215925.1   | C1 | Braenderup  | GCA 3119055.1 | D | Enteritidis | GCA 1973145.1 |
| B | Typhimurium | GCA 1219965.1   | C1 | Braenderup  | GCA 3120055.1 | D | Enteritidis | GCA 2034445.1 |
| B | Typhimurium | GCA 1220525.1   | C1 | Braenderup  | GCA 3118995.1 | D | Enteritidis | GCA 2037965.1 |
| B | Typhimurium | GCA 1221765.1   | C1 | Braenderup  | GCA 3119535.1 | D | Enteritidis | GCA 2038365.1 |
| B | Typhimurium | GCA 1222825.1   | C1 | Braenderup  | GCA 3120415.1 | D | Enteritidis | GCA 2038545.1 |
| B | Typhimurium | GCA 1566055.1   | C1 | Braenderup  | GCA 3119035.1 | D | Enteritidis | GCA 2038715.1 |
| B | Typhimurium | GCA 2074295.1   | C1 | Braenderup  | GCA 3117435.1 | D | Enteritidis | GCA 2038835.1 |
| B | Typhimurium | GCA 314915.2    | C1 | Braenderup  | GCA 3119955.1 | D | Enteritidis | GCA 2039065.1 |
| B | Typhimurium | GCA 1614175.1   | C1 | Braenderup  | GCA 3119895.1 | D | Enteritidis | GCA 2039085.1 |
| B | Typhimurium | GCA 1214425.1   | C1 | Braenderup  | GCA 3119915.1 | D | Enteritidis | GCA 2039455.1 |
| B | Typhimurium | GCA 1217545.1   | C1 | Braenderup  | GCA 3120955.1 | D | Enteritidis | GCA 2039595.1 |
| B | Typhimurium | GCA 1218265.1   | C1 | Braenderup  | GCA 3119995.1 | D | Enteritidis | GCA 2039685.1 |
| B | Typhimurium | GCA 1218325.1   | C1 | Braenderup  | GCA 3117535.1 | D | Enteritidis | GCA 2039925.1 |
| B | Typhimurium | GCA 1218545.1   | C1 | Braenderup  | GCA 3120535.1 | D | Enteritidis | GCA 2040495.1 |
| B | Typhimurium | GCA 1219805.1   | C1 | Braenderup  | GCA 3117755.1 | D | Enteritidis | GCA 2040785.1 |
| B | Typhimurium | GCA 1220785.1   | C1 | Braenderup  | GCA 3120935.1 | D | Enteritidis | GCA 2040825.1 |
| B | Typhimurium | GCA 1222625.1   | C1 | Braenderup  | GCA 3118815.1 | D | Enteritidis | GCA 2040965.1 |
| B | Typhimurium | GCA 1222905.1   | C1 | Braenderup  | GCA 3120235.1 | D | Enteritidis | GCA 2041345.1 |
| B | Typhimurium | GCA 2798875.1   | C1 | Braenderup  | GCA 3119815.1 | D | Enteritidis | GCA 2041365.1 |
| B | Typhimurium | GCA 1220945.1   | C1 | Braenderup  | GCA 3117395.1 | D | Enteritidis | GCA 2042015.1 |
| B | Typhimurium | GCA 1247205.1   | C1 | Braenderup  | GCA 3120075.1 | D | Enteritidis | GCA 2042525.1 |
| B | Typhimurium | GCA 1466375.1   | C1 | Braenderup  | GCA 3118975.1 | D | Enteritidis | GCA 278525.1  |
| B | Typhimurium | GCA 2063685.1   | C1 | Braenderup  | GCA 3120575.1 | D | Enteritidis | GCA 280195.1  |
| B | Typhimurium | GCA 2063745.1   | C1 | Braenderup  | GCA 3120875.1 | D | Enteritidis | GCA 1713995.1 |
| B | Typhimurium | GCA 900003065.1 | C1 | Braenderup  | GCA 3119935.1 | D | Enteritidis | GCA 1714065.1 |
| B | Typhimurium | GCA 1214965.1   | C1 | Oranienburg | GCA 486815.2  | D | Enteritidis | GCA 2060155.1 |
| B | Typhimurium | GCA 1219405.1   | C1 | Oranienburg | GCA 1880105.1 | D | Enteritidis | GCA 2242555.1 |
| B | Typhimurium | GCA 1221505.1   | C1 | Oranienburg | GCA 1879795.1 | D | Enteritidis | GCA 2038255.1 |
| B | Typhimurium | GCA 1223505.1   | C1 | Oranienburg | GCA 1879765.1 | D | Enteritidis | GCA 2038425.1 |
| B | Typhimurium | GCA 1594625.1   | C1 | Oranienburg | GCA 1879785.1 | D | Enteritidis | GCA 2039755.1 |
| B | Typhimurium | GCA 1955475.1   | C1 | Oranienburg | GCA 2061275.1 | D | Enteritidis | GCA 2039855.1 |
| B | Typhimurium | GCA 900003155.1 | C1 | Oranienburg | GCA 1879855.1 | D | Enteritidis | GCA 2040255.1 |

|   |             |                 |    |              |               |   |             |               |
|---|-------------|-----------------|----|--------------|---------------|---|-------------|---------------|
| B | Typhimurium | GCA 1216425.1   | C1 | Oranienburg  | GCA 1879955.1 | D | Enteritidis | GCA 2040325.1 |
| B | Typhimurium | GCA 1218985.1   | C1 | Oranienburg  | GCA 1880005.1 | D | Enteritidis | GCA 2040405.1 |
| B | Typhimurium | GCA 1221365.1   | C1 | Oranienburg  | GCA 2032155.1 | D | Enteritidis | GCA 2040665.1 |
| B | Typhimurium | GCA 1222565.1   | C1 | Oranienburg  | GCA 1879905.1 | D | Enteritidis | GCA 2040675.1 |
| B | Typhimurium | GCA 1223265.1   | C1 | Oranienburg  | GCA 3077255.1 | D | Enteritidis | GCA 2041025.1 |
| B | Typhimurium | GCA 2798815.1   | C1 | Oranienburg  | GCA 3077455.1 | D | Enteritidis | GCA 2041175.1 |
| B | Typhimurium | GCA 1479395.1   | C1 | Oranienburg  | GCA 486795.1  | D | Enteritidis | GCA 2041625.1 |
| B | Typhimurium | GCA 900002675.1 | C1 | Oranienburg  | GCA 1880025.1 | D | Enteritidis | GCA 2041925.1 |
| B | Typhimurium | GCA 1215785.1   | C1 | Oranienburg  | GCA 2062305.1 | D | Enteritidis | GCA 2041935.1 |
| B | Typhimurium | GCA 1220065.1   | C1 | Oranienburg  | GCA 3120855.1 | D | Enteritidis | GCA 2042005.1 |
| B | Typhimurium | GCA 1220505.1   | C1 | Oranienburg  | GCA 2059755.1 | D | Enteritidis | GCA 2042595.1 |
| B | Typhimurium | GCA 1223465.1   | C1 | Oranienburg  | GCA 1879925.1 | D | Enteritidis | GCA 2042785.1 |
| B | Typhimurium | GCA 1272095.1   | C1 | Oranienburg  | GCA 1880015.1 | D | Enteritidis | GCA 2076985.1 |
| B | Typhimurium | GCA 1479065.1   | C1 | Oranienburg  | GCA 3078255.1 | D | Enteritidis | GCA 280175.1  |
| B | Typhimurium | GCA 1479925.1   | C1 | Oranienburg  | GCA 1880035.1 | D | Enteritidis | GCA 280375.1  |
| B | Typhimurium | GCA 974015.1    | C1 | Oranienburg  | GCA 1879845.1 | D | Enteritidis | GCA 1271895.1 |
| B | Typhimurium | GCA 1216445.1   | C1 | Oranienburg  | GCA 1879935.1 | D | Enteritidis | GCA 1972555.1 |
| B | Typhimurium | GCA 1216585.1   | C1 | Oranienburg  | GCA 1879975.1 | D | Enteritidis | GCA 2039715.1 |
| B | Typhimurium | GCA 1220625.1   | C1 | Oranienburg  | GCA 1879865.1 | D | Enteritidis | GCA 2038225.1 |
| B | Typhimurium | GCA 1271715.1   | C1 | Oranienburg  | GCA 1880085.1 | D | Enteritidis | GCA 2042925.1 |
| B | Typhimurium | GCA 2036205.1   | C1 | Oranienburg  | GCA 2064215.1 | D | Enteritidis | GCA 2039425.1 |
| B | Typhimurium | GCA 2090955.1   | C1 | Oranienburg  | GCA 2156335.1 | D | Enteritidis | GCA 2039815.1 |
| B | Typhimurium | GCA 1215405.1   | C1 | Oranienburg  | GCA 495315.1  | D | Enteritidis | GCA 2040045.1 |
| B | Typhimurium | GCA 1219185.1   | C1 | Mbandaka     | GCA 2234515.1 | D | Enteritidis | GCA 2040125.1 |
| B | Typhimurium | GCA 1219285.1   | C1 | Mbandaka     | GCA 2064445.1 | D | Enteritidis | GCA 2040365.1 |
| B | Typhimurium | GCA 1220165.1   | C1 | Mbandaka     | GCA 2064435.1 | D | Enteritidis | GCA 2041375.1 |
| B | Typhimurium | GCA 1245535.1   | C1 | Mbandaka     | GCA 2066805.1 | D | Enteritidis | GCA 2041425.1 |
| B | Typhimurium | GCA 1955195.1   | C1 | Mbandaka     | GCA 1247475.1 | D | Enteritidis | GCA 2041455.1 |
| B | Typhimurium | GCA 2031405.1   | C1 | Mbandaka     | GCA 1247255.1 | D | Enteritidis | GCA 2041525.1 |
| B | Typhimurium | GCA 2090935.1   | C1 | Mbandaka     | GCA 1242775.1 | D | Enteritidis | GCA 2041825.1 |
| B | Typhimurium | GCA 2091335.1   | C1 | Mbandaka     | GCA 2036225.1 | D | Enteritidis | GCA 2041845.1 |
| B | Typhimurium | GCA 3186345.1   | C1 | Mbandaka     | GCA 2030575.1 | D | Enteritidis | GCA 2041885.1 |
| B | Typhimurium | GCA 1215885.1   | C1 | Mbandaka     | GCA 1835085.1 | D | Enteritidis | GCA 2042225.1 |
| B | Typhimurium | GCA 1216485.1   | C1 | Mbandaka     | GCA 2064455.1 | D | Enteritidis | GCA 2042235.1 |
| B | Typhimurium | GCA 1221405.1   | C1 | Mbandaka     | GCA 1833595.1 | D | Enteritidis | GCA 2042255.1 |
| B | Typhimurium | GCA 1221905.1   | C1 | Mbandaka     | GCA 2064495.1 | D | Enteritidis | GCA 2042395.1 |
| B | Typhimurium | GCA 1222485.1   | C1 | Mbandaka     | GCA 1480505.1 | D | Enteritidis | GCA 2042795.1 |
| B | Typhimurium | GCA 1222505.1   | C1 | Mbandaka     | GCA 1478205.1 | D | Enteritidis | GCA 2042825.1 |
| B | Typhimurium | GCA 312905.2    | C1 | Mbandaka     | GCA 1481155.1 | D | Enteritidis | GCA 278465.1  |
| B | Typhimurium | GCA 2032165.1   | C1 | Mbandaka     | GCA 1479985.1 | D | Enteritidis | GCA 280355.1  |
| B | Typhimurium | GCA 2091235.1   | C1 | Mbandaka     | GCA 416295.1  | D | Enteritidis | GCA 329045.1  |
| B | Typhimurium | GCA 648435.2    | C1 | Mbandaka     | GCA 1272395.1 | D | Enteritidis | GCA 329165.1  |
| B | Typhimurium | GCA 1216605.1   | C1 | Mbandaka     | GCA 486915.2  | D | Enteritidis | GCA 329205.1  |
| B | Typhimurium | GCA 1220445.1   | C1 | Mbandaka     | GCA 2062345.1 | D | Enteritidis | GCA 329605.1  |
| B | Typhimurium | GCA 1221605.1   | C1 | Mbandaka     | GCA 3067485.1 | D | Enteritidis | GCA 2061465.1 |
| B | Typhimurium | GCA 312865.2    | C1 | Mbandaka     | GCA 2065465.1 | D | Enteritidis | GCA 2038205.1 |
| B | Typhimurium | GCA 1955415.1   | C1 | Mbandaka     | GCA 316015.1  | D | Enteritidis | GCA 2038215.1 |
| B | Typhimurium | GCA 1214325.1   | C1 | Mbandaka     | GCA 3119495.1 | D | Enteritidis | GCA 2039915.1 |
| B | Typhimurium | GCA 1216205.1   | C1 | Mbandaka     | GCA 3118795.1 | D | Enteritidis | GCA 2039985.1 |
| B | Typhimurium | GCA 1217385.1   | C1 | Virchow      | GCA 171535.2  | D | Enteritidis | GCA 2040285.1 |
| B | Typhimurium | GCA 1220665.1   | C1 | Virchow      | GCA 516855.1  | D | Enteritidis | GCA 2040595.1 |
| B | Typhimurium | GCA 1221065.1   | C1 | Virchow      | GCA 2063525.1 | D | Enteritidis | GCA 2040885.1 |
| B | Typhimurium | GCA 1595185.1   | C1 | Virchow      | GCA 2049385.1 | D | Enteritidis | GCA 2040985.1 |
| B | Typhimurium | GCA 1955465.1   | C1 | Virchow      | GCA 2049055.1 | D | Enteritidis | GCA 2041775.1 |
| B | Typhimurium | GCA 1217265.1   | C1 | Virchow      | GCA 2063555.1 | D | Enteritidis | GCA 2041905.1 |
| B | Typhimurium | GCA 1217765.1   | C1 | Virchow      | GCA 2063495.1 | D | Enteritidis | GCA 2042025.1 |
| B | Typhimurium | GCA 1218865.1   | C1 | Virchow      | GCA 2063155.1 | D | Enteritidis | GCA 278545.1  |
| B | Typhimurium | GCA 1295635.1   | C1 | Virchow      | GCA 2063545.1 | D | Enteritidis | GCA 280215.1  |
| B | Typhimurium | GCA 2058005.1   | C1 | Virchow      | GCA 2065025.1 | D | Enteritidis | GCA 329305.1  |
| B | Typhimurium | GCA 648415.2    | C1 | Virchow      | GCA 2156325.1 | D | Enteritidis | GCA 329565.1  |
| B | Typhimurium | GCA 1218305.1   | C1 | Virchow      | GCA 486285.1  | D | Enteritidis | GCA 1643395.1 |
| B | Typhimurium | GCA 2270545.1   | C1 | Choleraesuis | GCA 187565.1  | D | Enteritidis | GCA 973935.1  |
| B | Typhimurium | GCA 1595305.1   | C1 | Choleraesuis | GCA 2045165.1 | D | Enteritidis | GCA 1102865.1 |
| B | Typhimurium | GCA 1614025.1   | C1 | Choleraesuis | GCA 2044825.1 | D | Enteritidis | GCA 2038065.1 |
| B | Typhimurium | GCA 1955385.1   | C1 | Choleraesuis | GCA 2045865.1 | D | Enteritidis | GCA 2038585.1 |
| B | Typhimurium | GCA 1217905.1   | C1 | Choleraesuis | GCA 2045915.1 | D | Enteritidis | GCA 2038625.1 |
| B | Typhimurium | GCA 1220585.1   | C1 | Choleraesuis | GCA 487315.1  | D | Enteritidis | GCA 2039285.1 |
| B | Typhimurium | GCA 1221805.1   | C1 | Choleraesuis | GCA 487295.2  | D | Enteritidis | GCA 2040445.1 |
| B | Typhimurium | GCA 2091095.1   | C1 | Choleraesuis | GCA 742815.1  | D | Enteritidis | GCA 2040925.1 |
| B | Typhimurium | GCA 2798725.1   | C1 | Choleraesuis | GCA 8105.1    | D | Enteritidis | GCA 2041615.1 |
| B | Typhimurium | GCA 1243555.1   | C1 | Rissen       | GCA 2044955.1 | D | Enteritidis | GCA 2041745.1 |

|   |             |                 |    |             |               |   |             |               |
|---|-------------|-----------------|----|-------------|---------------|---|-------------|---------------|
| B | Typhimurium | GCA 1955345.1   | C1 | Rissen      | GCA 2045825.1 | D | Enteritidis | GCA 2042105.1 |
| B | Typhimurium | GCA 2035055.1   | C1 | Rissen      | GCA 335835.1  | D | Enteritidis | GCA 2076975.1 |
| B | Typhimurium | GCA 900002645.1 | C1 | Rissen      | GCA 2062455.1 | D | Enteritidis | GCA 280295.1  |
| B | Typhimurium | GCA 312765.2    | C1 | Rissen      | GCA 2064035.1 | D | Enteritidis | GCA 280395.1  |
| B | Typhimurium | GCA 1243425.1   | C1 | Livingstone | GCA 956125.1  | D | Enteritidis | GCA 329105.1  |
| B | Typhimurium | GCA 1295665.1   | C1 | Livingstone | GCA 2062375.1 | D | Enteritidis | GCA 329285.1  |
| B | Typhimurium | GCA 1595145.1   | C1 | Livingstone | GCA 1241775.1 | D | Enteritidis | GCA 2066435.1 |
| B | Typhimurium | GCA 1217605.1   | C1 | Paratyphi C | GCA 18385.1   | D | Enteritidis | GCA 2107235.1 |
| B | Typhimurium | GCA 1565955.1   | C1 | Isangi      | GCA 2064825.1 | D | Enteritidis | GCA 2038665.1 |
| B | Typhimurium | GCA 1566175.1   | C1 | Ohio        | GCA 1241475.1 | D | Enteritidis | GCA 2040305.1 |
| B | Typhimurium | GCA 1221105.1   | C1 | Ohio        | GCA 1478795.1 | D | Enteritidis | GCA 2040735.1 |
| B | Typhimurium | GCA 1243695.1   | C1 | Ohio        | GCA 2031335.1 | D | Enteritidis | GCA 2041955.1 |
| B | Typhimurium | GCA 1955305.1   | C1 | Ohio        | GCA 2048745.1 | D | Enteritidis | GCA 2042165.1 |
| B | Typhimurium | GCA 2033165.1   | C1 | Ohio        | GCA 2048805.1 | D | Enteritidis | GCA 2077015.1 |
| B | Typhimurium | GCA 1216705.1   | C1 | Ohio        | GCA 2048905.1 | D | Enteritidis | GCA 280135.1  |
| B | Typhimurium | GCA 1217345.1   | C1 | Ohio        | GCA 2048935.1 | D | Enteritidis | GCA 280335.1  |
| B | Typhimurium | GCA 1219105.1   | C1 | Hartford    | GCA 293055.1  | D | Enteritidis | GCA 329405.1  |
| B | Typhimurium | GCA 1219645.1   | C1 | Hartford    | GCA 412935.1  | D | Enteritidis | GCA 1271955.1 |
| B | Typhimurium | GCA 1221445.1   | C1 | Hartford    | GCA 487875.1  | D | Enteritidis | GCA 1272015.1 |
| B | Typhimurium | GCA 1594595.1   | C1 | Hartford    | GCA 2058515.1 | D | Enteritidis | GCA 2040385.1 |
| B | Typhimurium | GCA 1595355.1   | C1 | Hartford    | GCA 2058735.1 | D | Enteritidis | GCA 2040765.1 |
| B | Typhimurium | GCA 1954895.1   | C1 | Hartford    | GCA 2106515.1 | D | Enteritidis | GCA 2041215.1 |
| B | Typhimurium | GCA 2090945.1   | C1 | Hartford    | GCA 2241695.2 | D | Enteritidis | GCA 2042365.1 |
| B | Typhimurium | GCA 648475.2    | C1 | Hartford    | GCA 2241735.2 | D | Enteritidis | GCA 2042455.1 |
| B | Typhimurium | GCA 1295155.1   | C1 | Concord     | GCA 3030265.1 | D | Enteritidis | GCA 2042495.1 |
| B | Typhimurium | GCA 1479125.1   | C1 | Concord     | GCA 2062415.1 | D | Enteritidis | GCA 261985.1  |
| B | Typhimurium | GCA 3118355.1   | C1 | Concord     | GCA 2065885.1 | D | Enteritidis | GCA 329345.1  |
| B | Typhimurium | GCA 1215585.1   | C1 | Concord     | GCA 2065915.1 | D | Enteritidis | GCA 329525.1  |
| B | Typhimurium | GCA 1244705.1   | C1 | Concord     | GCA 2065935.1 | D | Enteritidis | GCA 329805.1  |
| B | Typhimurium | GCA 1245125.1   | C1 | Oslo        | GCA 2046815.1 | D | Enteritidis | GCA 1271905.1 |
| B | Typhimurium | GCA 1595105.1   | C1 | Oslo        | GCA 2048195.1 | D | Enteritidis | GCA 1271955.1 |
| B | Typhimurium | GCA 900007435.1 | C2 | Newport     | GCA 751335.1  | D | Enteritidis | GCA 1713775.1 |
| B | Typhimurium | GCA 1218125.1   | C2 | Newport     | GCA 1835415.1 | D | Enteritidis | GCA 2065775.1 |
| B | Typhimurium | GCA 1221625.1   | C2 | Newport     | GCA 272935.1  | D | Enteritidis | GCA 2039745.1 |
| B | Typhimurium | GCA 1222145.1   | C2 | Newport     | GCA 2241515.1 | D | Enteritidis | GCA 2040585.1 |
| B | Typhimurium | GCA 312825.2    | C2 | Newport     | GCA 2241635.1 | D | Enteritidis | GCA 2041765.1 |
| B | Typhimurium | GCA 1240785.1   | C2 | Newport     | GCA 272575.1  | D | Enteritidis | GCA 2042675.1 |
| B | Typhimurium | GCA 1295675.1   | C2 | Newport     | GCA 2106575.1 | D | Enteritidis | GCA 280115.1  |
| B | Typhimurium | GCA 1477745.1   | C2 | Newport     | GCA 2241705.1 | D | Enteritidis | GCA 280455.1  |
| B | Typhimurium | GCA 1477855.1   | C2 | Newport     | GCA 1834665.1 | D | Enteritidis | GCA 1238365.1 |
| B | Typhimurium | GCA 2091275.1   | C2 | Newport     | GCA 483775.1  | D | Enteritidis | GCA 1478145.1 |
| B | Typhimurium | GCA 900002925.1 | C2 | Newport     | GCA 2107255.1 | D | Enteritidis | GCA 1714025.1 |
| B | Typhimurium | GCA 900003265.1 | C2 | Newport     | GCA 2242475.1 | D | Enteritidis | GCA 1691655.1 |
| B | Typhimurium | GCA 1222345.1   | C2 | Newport     | GCA 2242215.1 | D | Enteritidis | GCA 2038115.1 |
| B | Typhimurium | GCA 1223305.1   | C2 | Newport     | GCA 1835255.1 | D | Enteritidis | GCA 2041575.1 |
| B | Typhimurium | GCA 1478125.1   | C2 | Newport     | GCA 2241665.1 | D | Enteritidis | GCA 2077315.1 |
| B | Typhimurium | GCA 2030885.1   | C2 | Newport     | GCA 2241615.1 | D | Enteritidis | GCA 280475.1  |
| B | Typhimurium | GCA 2032975.1   | C2 | Newport     | GCA 2242395.1 | D | Enteritidis | GCA 329385.1  |
| B | Typhimurium | GCA 1214545.1   | C2 | Newport     | GCA 2242365.1 | D | Enteritidis | GCA 1713945.1 |
| B | Typhimurium | GCA 1216845.1   | C2 | Newport     | GCA 272535.1  | D | Enteritidis | GCA 2038705.1 |
| B | Typhimurium | GCA 1480775.1   | C2 | Newport     | GCA 2107585.1 | D | Enteritidis | GCA 2038785.1 |
| B | Typhimurium | GCA 1955295.1   | C2 | Newport     | GCA 2263135.1 | D | Enteritidis | GCA 2042115.1 |
| B | Typhimurium | GCA 1955315.1   | C2 | Newport     | GCA 16045.1   | D | Enteritidis | GCA 329625.1  |
| B | Typhimurium | GCA 1955375.1   | C2 | Newport     | GCA 271885.2  | D | Enteritidis | GCA 1478845.1 |
| B | Typhimurium | GCA 1479155.1   | C2 | Newport     | GCA 271905.2  | D | Enteritidis | GCA 3067565.1 |
| B | Typhimurium | GCA 2091025.1   | C2 | Newport     | GCA 272715.4  | D | Enteritidis | GCA 2038445.1 |
| B | Typhimurium | GCA 900003225.1 | C2 | Newport     | GCA 272735.4  | D | Enteritidis | GCA 2042315.1 |
| B | Typhimurium | GCA 1218585.1   | C2 | Newport     | GCA 272755.4  | D | Enteritidis | GCA 2107355.1 |
| B | Typhimurium | GCA 1218685.1   | C2 | Newport     | GCA 272775.4  | D | Enteritidis | GCA 2039845.1 |
| B | Typhimurium | GCA 1220865.1   | C2 | Newport     | GCA 272815.2  | D | Enteritidis | GCA 2039965.1 |
| B | Typhimurium | GCA 1223105.1   | C2 | Newport     | GCA 272835.4  | D | Enteritidis | GCA 2041505.1 |
| B | Typhimurium | GCA 2300245.2   | C2 | Newport     | GCA 272895.3  | D | Enteritidis | GCA 2042445.1 |
| B | Typhimurium | GCA 1595235.1   | C2 | Newport     | GCA 442415.1  | D | Enteritidis | GCA 280255.1  |
| B | Typhimurium | GCA 1955225.1   | C2 | Newport     | GCA 973685.1  | D | Enteritidis | GCA 280275.1  |
| B | Typhimurium | GCA 1955395.1   | C2 | Newport     | GCA 1278315.1 | D | Enteritidis | GCA 1271575.1 |
| B | Typhimurium | GCA 2035635.1   | C2 | Newport     | GCA 1890165.1 | D | Enteritidis | GCA 2906985.1 |
| B | Typhimurium | GCA 2063725.1   | C2 | Newport     | GCA 1922165.1 | D | Enteritidis | GCA 329065.1  |
| B | Typhimurium | GCA 2091015.1   | C2 | Newport     | GCA 272795.2  | D | Enteritidis | GCA 329085.1  |
| B | Typhimurium | GCA 2091185.1   | C2 | Newport     | GCA 1278275.1 | D | Enteritidis | GCA 329545.1  |
| B | Typhimurium | GCA 2091345.1   | C2 | Newport     | GCA 1278295.1 | D | Enteritidis | GCA 329825.1  |
| B | Typhimurium | GCA 1295495.1   | C2 | Newport     | GCA 1890185.1 | D | Enteritidis | GCA 1973515.1 |

|   |             |                 |    |         |               |   |             |               |
|---|-------------|-----------------|----|---------|---------------|---|-------------|---------------|
| B | Typhimurium | GCA 1478065.1   | C2 | Newport | GCA 1890445.1 | D | Enteritidis | GCA 2042745.1 |
| B | Typhimurium | GCA 2264585.1   | C2 | Newport | GCA 2241545.2 | D | Enteritidis | GCA 280095.1  |
| B | Typhimurium | GCA 1594935.1   | C2 | Newport | GCA 3119735.1 | D | Enteritidis | GCA 280155.1  |
| B | Typhimurium | GCA 1955265.1   | C2 | Newport | GCA 3079195.1 | D | Enteritidis | GCA 280415.1  |
| B | Typhimurium | GCA 2030565.1   | C2 | Newport | GCA 3119015.1 | D | Enteritidis | GCA 329585.1  |
| B | Typhimurium | GCA 2057985.1   | C2 | Newport | GCA 3121155.1 | D | Enteritidis | GCA 2065685.1 |
| B | Typhimurium | GCA 900019235.1 | C2 | Newport | GCA 3120495.1 | D | Enteritidis | GCA 2242565.1 |
| B | Typhimurium | GCA 1219845.1   | C2 | Newport | GCA 3117935.1 | D | Enteritidis | GCA 3067575.1 |
| B | Typhimurium | GCA 1219865.1   | C2 | Newport | GCA 3120835.1 | D | Enteritidis | GCA 280435.1  |
| B | Typhimurium | GCA 1222205.1   | C2 | Newport | GCA 3117815.1 | D | Enteritidis | GCA 2242595.1 |
| B | Typhimurium | GCA 486125.1    | C2 | Newport | GCA 3200935.1 | D | Enteritidis | GCA 280075.1  |
| B | Typhimurium | GCA 1595315.1   | C2 | Newport | GCA 3078315.1 | D | Enteritidis | GCA 329725.1  |
| B | Typhimurium | GCA 2034985.1   | C2 | Newport | GCA 3118015.1 | D | Enteritidis | GCA 329925.1  |
| B | Typhimurium | GCA 2058595.1   | C2 | Newport | GCA 3118095.1 | D | Enteritidis | GCA 329485.1  |
| B | Typhimurium | GCA 2091255.1   | C2 | Newport | GCA 3200295.1 | D | Enteritidis | GCA 329745.1  |
| B | Typhimurium | GCA 2252405.2   | C2 | Newport | GCA 3077555.1 | D | Enteritidis | GCA 330565.1  |
| B | Typhimurium | GCA 1479365.1   | C2 | Newport | GCA 3117405.1 | D | Enteritidis | GCA 2030505.1 |
| B | Typhimurium | GCA 1221045.1   | C2 | Newport | GCA 3117595.1 | D | Enteritidis | GCA 329505.1  |
| B | Typhimurium | GCA 2300265.2   | C2 | Newport | GCA 3200335.1 | D | Enteritidis | GCA 329185.1  |
| B | Typhimurium | GCA 1594955.1   | C2 | Newport | GCA 3200905.1 | D | Enteritidis | GCA 329705.1  |
| B | Typhimurium | GCA 2030385.1   | C2 | Newport | GCA 3077515.1 | D | Enteritidis | GCA 1271615.1 |
| B | Typhimurium | GCA 2090995.1   | C2 | Newport | GCA 3117955.1 | D | Enteritidis | GCA 1655705.1 |
| B | Typhimurium | GCA 1222945.1   | C2 | Newport | GCA 3118755.1 | D | Enteritidis | GCA 330585.1  |
| B | Typhimurium | GCA 2283275.1   | C2 | Newport | GCA 3077855.1 | D | Enteritidis | GCA 329645.1  |
| B | Typhimurium | GCA 1479335.1   | C2 | Newport | GCA 3120315.1 | D | Enteritidis | GCA 329885.1  |
| B | Typhimurium | GCA 2283795.1   | C2 | Newport | GCA 3201025.1 | D | Enteritidis | GCA 2035985.1 |
| B | Typhimurium | GCA 2300295.2   | C2 | Newport | GCA 3117145.1 | D | Enteritidis | GCA 2909165.1 |
| B | Typhimurium | GCA 1480485.1   | C2 | Newport | GCA 3117835.1 | D | Enteritidis | GCA 329445.1  |
| B | Typhimurium | GCA 1218385.1   | C2 | Newport | GCA 3199635.1 | D | Enteritidis | GCA 1973435.1 |
| B | Typhimurium | GCA 1218405.1   | C2 | Newport | GCA 3201055.1 | D | Enteritidis | GCA 329425.1  |
| B | Typhimurium | GCA 1218765.1   | C2 | Newport | GCA 3119795.1 | D | Enteritidis | GCA 329465.1  |
| B | Typhimurium | GCA 1480265.1   | C2 | Newport | GCA 2242445.1 | D | Enteritidis | GCA 329765.1  |
| B | Typhimurium | GCA 2018355.1   | C2 | Newport | GCA 1834705.1 | D | Enteritidis | GCA 329785.1  |
| B | Typhimurium | GCA 3186365.1   | C2 | Newport | GCA 3117795.1 | D | Enteritidis | GCA 329905.1  |
| B | Typhimurium | GCA 900002695.1 | C2 | Newport | GCA 3077435.1 | D | Enteritidis | GCA 330005.1  |
| B | Typhimurium | GCA 900003115.1 | C2 | Newport | GCA 3120195.1 | D | Enteritidis | GCA 2065735.1 |
| B | Typhimurium | GCA 1222645.1   | C2 | Newport | GCA 3201095.1 | D | Enteritidis | GCA 335895.1  |
| B | Typhimurium | GCA 1241585.1   | C2 | Newport | GCA 3078635.1 | D | Enteritidis | GCA 1271685.1 |
| B | Typhimurium | GCA 1480085.1   | C2 | Newport | GCA 272875.1  | D | Enteritidis | GCA 2062685.1 |
| B | Typhimurium | GCA 1955455.1   | C2 | Newport | GCA 474375.1  | D | Enteritidis | GCA 329945.1  |
| B | Typhimurium | GCA 900002905.1 | C2 | Newport | GCA 1051555.1 | D | Enteritidis | GCA 2066535.1 |
| B | Typhimurium | GCA 1244695.1   | C2 | Newport | GCA 1051695.1 | D | Enteritidis | GCA 2033105.1 |
| B | Typhimurium | GCA 2062935.1   | C2 | Newport | GCA 3117695.1 | D | Enteritidis | GCA 2063265.1 |
| B | Typhimurium | GCA 1271835.1   | C2 | Newport | GCA 3119475.1 | D | Enteritidis | GCA 2242515.1 |
| B | Typhimurium | GCA 2300255.2   | C2 | Newport | GCA 2242335.1 | D | Enteritidis | GCA 1272255.1 |
| B | Typhimurium | GCA 1481235.1   | C2 | Newport | GCA 272555.1  | D | Enteritidis | GCA 1479885.1 |
| B | Typhimurium | GCA 1955235.1   | C2 | Newport | GCA 2106655.1 | D | Enteritidis | GCA 330245.1  |
| B | Typhimurium | GCA 2091045.1   | C2 | Newport | GCA 3121115.1 | D | Enteritidis | GCA 330305.1  |
| B | Typhimurium | GCA 900003195.1 | C2 | Newport | GCA 272635.1  | D | Enteritidis | GCA 313715.2  |
| B | Typhimurium | GCA 1295415.1   | C2 | Newport | GCA 272655.1  | D | Enteritidis | GCA 329665.1  |
| B | Typhimurium | GCA 900002665.1 | C2 | Newport | GCA 474535.1  | D | Enteritidis | GCA 1272125.1 |
| B | Typhimurium | GCA 1219665.1   | C2 | Newport | GCA 1834645.1 | D | Enteritidis | GCA 2041065.1 |
| B | Typhimurium | GCA 1242345.1   | C2 | Newport | GCA 2242355.1 | D | Enteritidis | GCA 330085.1  |
| B | Typhimurium | GCA 1478045.1   | C2 | Newport | GCA 3118075.1 | D | Enteritidis | GCA 1243345.1 |
| B | Typhimurium | GCA 1594915.1   | C2 | Newport | GCA 3120515.1 | D | Enteritidis | GCA 329965.1  |
| B | Typhimurium | GCA 1595155.1   | C2 | Newport | GCA 2242275.1 | D | Enteritidis | GCA 1280185.1 |
| B | Typhimurium | GCA 2091075.1   | C2 | Newport | GCA 1051605.1 | D | Enteritidis | GCA 330105.1  |
| B | Typhimurium | GCA 648455.2    | C2 | Newport | GCA 1051625.1 | D | Enteritidis | GCA 2034005.1 |
| B | Typhimurium | GCA 1219505.1   | C2 | Newport | GCA 1051705.1 | D | Enteritidis | GCA 1972675.1 |
| B | Typhimurium | GCA 1222065.1   | C2 | Newport | GCA 2242295.1 | D | Enteritidis | GCA 2032355.1 |
| B | Typhimurium | GCA 784225.1    | C2 | Newport | GCA 2242535.1 | D | Enteritidis | GCA 329985.1  |
| B | Typhimurium | GCA 1477735.1   | C2 | Newport | GCA 3078535.1 | D | Enteritidis | GCA 330345.1  |
| B | Typhimurium | GCA 2030775.1   | C2 | Newport | GCA 1051615.1 | D | Enteritidis | GCA 1271415.1 |
| B | Typhimurium | GCA 900006005.1 | C2 | Newport | GCA 2106745.1 | D | Enteritidis | GCA 2030735.1 |
| B | Typhimurium | GCA 1595275.1   | C2 | Newport | GCA 1051685.1 | D | Enteritidis | GCA 330205.1  |
| B | Typhimurium | GCA 900005975.1 | C2 | Newport | GCA 3120375.1 | D | Enteritidis | GCA 1271975.1 |
| B | Typhimurium | GCA 784315.1    | C2 | Newport | GCA 474515.1  | D | Enteritidis | GCA 2810205.1 |
| B | Typhimurium | GCA 2035105.1   | C2 | Newport | GCA 2065355.1 | D | Enteritidis | GCA 278505.1  |
| B | Typhimurium | GCA 900003285.1 | C2 | Newport | GCA 272855.1  | D | Enteritidis | GCA 1973225.1 |
| B | Typhimurium | GCA 1241945.1   | C2 | Newport | GCA 272915.1  | D | Enteritidis | GCA 330125.1  |
| B | Typhimurium | GCA 1479325.1   | C2 | Newport | GCA 3117555.1 | D | Enteritidis | GCA 330265.1  |

|   |             |                 |    |         |               |   |             |               |
|---|-------------|-----------------|----|---------|---------------|---|-------------|---------------|
| B | Typhimurium | GCA 1241975.1   | C2 | Newport | GCA 171415.1  | D | Enteritidis | GCA 1272285.1 |
| B | Typhimurium | GCA 900003355.1 | C2 | Newport | GCA 272615.1  | D | Enteritidis | GCA 330425.1  |
| B | Typhimurium | GCA 900003175.1 | C2 | Newport | GCA 272695.1  | D | Enteritidis | GCA 1271735.1 |
| B | Typhimurium | GCA 784215.1    | C2 | Newport | GCA 2107185.1 | D | Enteritidis | GCA 329845.1  |
| B | Typhimurium | GCA 1242395.1   | C2 | Newport | GCA 272955.1  | D | Enteritidis | GCA 329685.1  |
| B | Typhimurium | GCA 2091315.1   | C2 | Newport | GCA 2065345.1 | D | Enteritidis | GCA 330465.1  |
| B | Typhimurium | GCA 900002725.1 | C2 | Newport | GCA 2107465.1 | D | Enteritidis | GCA 336115.1  |
| B | Typhimurium | GCA 1218285.1   | C2 | Newport | GCA 2242405.1 | D | Enteritidis | GCA 330045.1  |
| B | Typhimurium | GCA 312885.2    | C2 | Newport | GCA 3079035.1 | D | Enteritidis | GCA 329025.1  |
| B | Typhimurium | GCA 1480145.1   | C2 | Newport | GCA 344845.1  | D | Enteritidis | GCA 1271425.1 |
| B | Typhimurium | GCA 2252465.2   | C2 | Newport | GCA 3120395.1 | D | Enteritidis | GCA 330065.1  |
| B | Typhimurium | GCA 784235.1    | C2 | Newport | GCA 3079215.1 | D | Enteritidis | GCA 330185.1  |
| B | Typhimurium | GCA 784245.1    | C2 | Newport | GCA 1051635.1 | D | Enteritidis | GCA 465535.1  |
| B | Typhimurium | GCA 2066815.1   | C2 | Newport | GCA 1051715.1 | D | Enteritidis | GCA 330145.1  |
| B | Typhimurium | GCA 900016625.1 | C2 | Newport | GCA 272675.1  | D | Enteritidis | GCA 2803705.1 |
| B | Typhimurium | GCA 1240475.1   | C2 | Newport | GCA 483955.1  | D | Enteritidis | GCA 330385.1  |
| B | Typhimurium | GCA 2036315.1   | C2 | Newport | GCA 2106595.1 | D | Enteritidis | GCA 414785.2  |
| B | Typhimurium | GCA 2265285.1   | C2 | Newport | GCA 2242205.1 | D | Enteritidis | GCA 1272175.1 |
| B | Typhimurium | GCA 2252365.2   | C2 | Newport | GCA 3119875.1 | D | Enteritidis | GCA 330225.1  |
| B | Typhimurium | GCA 900007385.1 | C2 | Newport | GCA 1243515.1 | D | Enteritidis | GCA 414805.2  |
| B | Typhimurium | GCA 900009535.1 | C2 | Newport | GCA 483735.1  | D | Enteritidis | GCA 330365.1  |
| B | Typhimurium | GCA 1241075.1   | C2 | Newport | GCA 2056915.1 | D | Enteritidis | GCA 414865.2  |
| B | Typhimurium | GCA 2260995.1   | C2 | Newport | GCA 2242195.1 | D | Enteritidis | GCA 414905.2  |
| B | Typhimurium | GCA 648495.2    | C2 | Newport | GCA 2056745.1 | D | Enteritidis | GCA 414885.2  |
| B | Typhimurium | GCA 1223325.1   | C2 | Newport | GCA 2242305.1 | D | Enteritidis | GCA 414845.2  |
| B | Typhimurium | GCA 1243395.1   | C2 | Newport | GCA 272975.1  | D | Enteritidis | GCA 336055.1  |
| B | Typhimurium | GCA 2031525.1   | C2 | Newport | GCA 272515.1  | D | Enteritidis | GCA 414765.2  |
| B | Typhimurium | GCA 784295.1    | C2 | Newport | GCA 1954765.1 | D | Enteritidis | GCA 2037825.1 |
| B | Typhimurium | GCA 1271795.1   | C2 | Newport | GCA 2242495.1 | D | Enteritidis | GCA 414825.2  |
| B | Typhimurium | GCA 2252355.2   | C2 | Newport | GCA 2056845.1 | D | Enteritidis | GCA 414925.2  |
| B | Typhimurium | GCA 1241425.1   | C2 | Newport | GCA 344885.1  | D | Enteritidis | GCA 335855.1  |
| B | Typhimurium | GCA 2265805.1   | C2 | Newport | GCA 2058035.1 | D | Enteritidis | GCA 330325.1  |
| B | Typhimurium | GCA 1480955.1   | C2 | Newport | GCA 1272275.1 | D | Enteritidis | GCA 505105.1  |
| B | Typhimurium | GCA 1588045.1   | C2 | Newport | GCA 1479995.1 | D | Enteritidis | GCA 330165.1  |
| B | Typhimurium | GCA 2283535.1   | C2 | Newport | GCA 2090655.1 | D | Panama      | GCA 1448795.1 |
| B | Typhimurium | GCA 1215985.1   | C2 | Newport | GCA 2090815.1 | D | Panama      | GCA 2062625.1 |
| B | Typhimurium | GCA 1758445.1   | C2 | Newport | GCA 2106815.1 | D | Panama      | GCA 486765.2  |
| B | Typhimurium | GCA 2260985.1   | C2 | Newport | GCA 2107295.1 | D | Itami       | GCA 1448495.1 |
| B | Typhimurium | GCA 2300275.2   | C2 | Newport | GCA 3120135.1 | D | Itami       | GCA 2064815.1 |
| B | Typhimurium | GCA 1480205.1   | C2 | Newport | GCA 484215.1  | D | Blegdam     | GCA 1975265.1 |
| B | Typhimurium | GCA 900003105.1 | C2 | Newport | GCA 1480655.1 | D | Blegdam     | GCA 1448595.1 |
| B | Typhimurium | GCA 2723785.1   | C2 | Newport | GCA 2090915.1 | D | Moscow      | GCA 1975555.1 |
| B | Typhimurium | GCA 900002705.1 | C2 | Newport | GCA 2032465.1 | D | Moscow      | GCA 1448545.1 |
| B | Typhimurium | GCA 900003185.1 | C2 | Newport | GCA 2090625.1 | D | Berta       | GCA 1448475.1 |
| B | Typhimurium | GCA 1714645.1   | C2 | Newport | GCA 2090835.1 | D | Berta       | GCA 487375.1  |
| B | Typhimurium | GCA 2091285.1   | C2 | Newport | GCA 2090535.1 | D | Berta       | GCA 964145.1  |
| B | Typhimurium | GCA 900003345.1 | C2 | Newport | GCA 2090615.1 | D | Berta       | GCA 964155.1  |
| B | Typhimurium | GCA 1595065.1   | C2 | Newport | GCA 2242285.1 | D | Berta       | GCA 1242065.1 |
| B | Typhimurium | GCA 900007445.1 | C2 | Newport | GCA 2056755.1 | D | Berta       | GCA 1479635.1 |
| B | Typhimurium | GCA 1222125.1   | C2 | Newport | GCA 2064275.1 | D | Berta       | GCA 1480555.1 |
| B | Typhimurium | GCA 1243505.1   | C2 | Newport | GCA 483675.1  | D | Berta       | GCA 2030515.1 |
| B | Typhimurium | GCA 1755885.1   | C2 | Newport | GCA 2033925.1 | D | Berta       | GCA 2030615.1 |
| B | Typhimurium | GCA 2065035.1   | C2 | Newport | GCA 2091155.1 | D | Berta       | GCA 2030645.1 |
| B | Typhimurium | GCA 3079095.1   | C2 | Newport | GCA 2090545.1 | D | Berta       | GCA 2031535.1 |
| B | Typhimurium | GCA 900002975.1 | C2 | Newport | GCA 2090695.1 | D | Berta       | GCA 2058795.1 |
| B | Typhimurium | GCA 2018325.1   | C2 | Newport | GCA 2107155.1 | D | Berta       | GCA 2061255.1 |
| B | Typhimurium | GCA 1594515.1   | C2 | Newport | GCA 2056835.1 | D | Miami       | GCA 2050855.1 |
| B | Typhimurium | GCA 900002985.1 | C2 | Newport | GCA 344825.1  | D | Miami       | GCA 486935.1  |
| B | Typhimurium | GCA 1588105.1   | C2 | Newport | GCA 2090845.1 | D | Miami       | GCA 2050915.1 |
| B | Typhimurium | GCA 1588165.1   | C2 | Newport | GCA 2107265.1 | D | Miami       | GCA 2050945.1 |
| B | Typhimurium | GCA 1594905.1   | C2 | Newport | GCA 1954845.1 | D | Miami       | GCA 2050975.1 |
| B | Typhimurium | GCA 2252345.2   | C2 | Newport | GCA 2090705.1 | D | Miami       | GCA 2049065.1 |
| B | Typhimurium | GCA 900002635.1 | C2 | Newport | GCA 2090865.1 | D | Eastbourne  | GCA 2266205.1 |
| B | Typhimurium | GCA 900002795.1 | C2 | Newport | GCA 2106275.1 | D | Eastbourne  | GCA 2046055.1 |
| B | Typhimurium | GCA 900002955.1 | C2 | Newport | GCA 3078935.1 | D | Eastbourne  | GCA 2046145.1 |
| B | Typhimurium | GCA 1595345.1   | C2 | Newport | GCA 1955105.1 | D | Eastbourne  | GCA 2047975.1 |
| B | Typhimurium | GCA 2261025.1   | C2 | Newport | GCA 1955135.1 | D | Eastbourne  | GCA 2048025.1 |
| B | Typhimurium | GCA 900002775.1 | C2 | Newport | GCA 2057865.1 | D | Lomalinda   | GCA 2045385.1 |
| B | Typhimurium | GCA 1588285.1   | C2 | Newport | GCA 2059855.1 | D | Lomalinda   | GCA 2046525.1 |
| B | Typhimurium | GCA 1587775.1   | C2 | Newport | GCA 1955165.1 | D | Lomalinda   | GCA 2045405.1 |
| B | Typhimurium | GCA 1588155.1   | C2 | Newport | GCA 2107375.1 | D | Lomalinda   | GCA 2046245.1 |

|   |              |                 |    |          |               |   |              |               |
|---|--------------|-----------------|----|----------|---------------|---|--------------|---------------|
| B | Typhimurium  | GCA 1481175.1   | C2 | Newport  | GCA 3120255.1 | D | Lomalinda    | GCA 2046275.1 |
| B | Typhimurium  | GCA 2033135.1   | C2 | Newport  | GCA 344865.1  | D | Lomalinda    | GCA 2048075.1 |
| B | Typhimurium  | GCA 1588215.1   | C2 | Newport  | GCA 1955075.1 | D | Hillingdon   | GCA 1975385.1 |
| B | Typhimurium  | GCA 1594505.1   | C2 | Newport  | GCA 2061655.1 | D | Hillingdon   | GCA 1448725.1 |
| B | Typhimurium  | GCA 2063655.1   | C2 | Newport  | GCA 1955065.1 | D | Ouakam       | GCA 2211565.1 |
| B | Typhimurium  | GCA 900007195.1 | C2 | Newport  | GCA 2843885.1 | D | Ouakam       | GCA 1077835.1 |
| B | Typhimurium  | GCA 1587845.1   | C2 | Newport  | GCA 484455.1  | D | Macclesfield | GCA 2211585.1 |
| B | Typhimurium  | GCA 1588455.1   | C2 | Newport  | GCA 2090875.1 | D | India        | GCA 2208195.1 |
| B | Typhimurium  | GCA 900006185.1 | C2 | Newport  | GCA 1955035.1 | D | Ekotedo      | GCA 2265975.1 |
| B | Typhimurium  | GCA 1588495.1   | C2 | Newport  | GCA 2091175.1 | D | Ekotedo      | GCA 2266095.1 |
| B | Typhimurium  | GCA 1271745.1   | C2 | Newport  | GCA 3199615.1 | D | Baildon      | GCA 2045255.1 |
| B | Typhimurium  | GCA 2723705.1   | C2 | Newport  | GCA 2057935.1 | D | Baildon      | GCA 2045245.1 |
| B | Typhimurium  | GCA 2252605.2   | C2 | Newport  | GCA 3120355.1 | D | Baildon      | GCA 2046495.1 |
| B | Typhimurium  | GCA 1587965.1   | C2 | Newport  | GCA 2090765.1 | D | Baildon      | GCA 2046425.1 |
| B | Typhimurium  | GCA 2260565.1   | C2 | Newport  | GCA 1954815.1 | D | Baildon      | GCA 2046175.1 |
| B | Typhimurium  | GCA 1587855.1   | C2 | Newport  | GCA 1954835.1 | D | Baildon      | GCA 2047945.1 |
| B | Typhimurium  | GCA 1587945.1   | C2 | Newport  | GCA 2059255.1 | D | Baildon      | GCA 2105895.1 |
| B | Typhimurium  | GCA 2631105.1   | C2 | Newport  | GCA 2090555.1 | D | Typhi        | GCA 195995.1  |
| B | Typhimurium  | GCA 1587915.1   | C2 | Newport  | GCA 3118635.1 | D | Typhi        | GCA 7545.1    |
| B | Typhimurium  | GCA 1588015.1   | C2 | Newport  | GCA 2090665.1 | E | Weltevreden  | GCA 1410255.1 |
| B | Typhimurium  | GCA 1588315.1   | C2 | Newport  | GCA 3200345.1 | E | Weltevreden  | GCA 1409695.1 |
| B | Typhimurium  | GCA 1588195.1   | C2 | Newport  | GCA 1955145.1 | E | Weltevreden  | GCA 1410735.1 |
| B | Typhimurium  | GCA 1595075.1   | C2 | Newport  | GCA 2242225.1 | E | Weltevreden  | GCA 1411095.1 |
| B | Typhimurium  | GCA 1214785.1   | C2 | Newport  | GCA 484475.1  | E | Weltevreden  | GCA 1409235.1 |
| B | 4,[5],12:i:- | GCA 430165.1    | C2 | Newport  | GCA 2060195.1 | E | Weltevreden  | GCA 1410055.1 |
| B | 4,[5],12:i:- | GCA 3074555.1   | C2 | Newport  | GCA 3118695.1 | E | Weltevreden  | GCA 1410975.1 |
| B | 4,[5],12:i:- | GCA 3074635.1   | C2 | Newport  | GCA 1955055.1 | E | Weltevreden  | GCA 1409255.1 |
| B | 4,[5],12:i:- | GCA 3074575.1   | C2 | Newport  | GCA 1051795.1 | E | Weltevreden  | GCA 1409575.1 |
| B | 4,[5],12:i:- | GCA 2066795.1   | C2 | Newport  | GCA 1051815.1 | E | Weltevreden  | GCA 1409895.1 |
| B | 4,[5],12:i:- | GCA 2106195.1   | C2 | Newport  | GCA 2058635.1 | E | Weltevreden  | GCA 1410675.1 |
| B | 4,[5],12:i:- | GCA 2034915.1   | C2 | Newport  | GCA 2106215.1 | E | Weltevreden  | GCA 1411335.1 |
| B | 4,[5],12:i:- | GCA 335915.1    | C2 | Newport  | GCA 1954825.1 | E | Weltevreden  | GCA 1409655.1 |
| B | 4,[5],12:i:- | GCA 2034975.1   | C2 | Newport  | GCA 1051535.1 | E | Weltevreden  | GCA 1409315.1 |
| B | 4,[5],12:i:- | GCA 3065135.1   | C2 | Newport  | GCA 1051765.1 | E | Weltevreden  | GCA 1409595.1 |
| B | 4,[5],12:i:- | GCA 335935.1    | C2 | Newport  | GCA 2109205.1 | E | Weltevreden  | GCA 1410275.1 |
| B | 4,[5],12:i:- | GCA 3065205.1   | C2 | Newport  | GCA 483755.1  | E | Weltevreden  | GCA 1409475.1 |
| B | 4,[5],12:i:- | GCA 3066895.1   | C2 | Newport  | GCA 2109245.1 | E | Weltevreden  | GCA 1410535.1 |
| B | 4,[5],12:i:- | GCA 3065225.1   | C2 | Newport  | GCA 3199545.1 | E | Weltevreden  | GCA 1411015.1 |
| B | 4,[5],12:i:- | GCA 2034905.1   | C2 | Newport  | GCA 2058335.1 | E | Weltevreden  | GCA 1409815.1 |
| B | 4,[5],12:i:- | GCA 3067205.1   | C2 | Newport  | GCA 2109075.1 | E | Weltevreden  | GCA 1410235.1 |
| B | 4,[5],12:i:- | GCA 3065305.1   | C2 | Newport  | GCA 1954755.1 | E | Weltevreden  | GCA 1410335.1 |
| B | 4,[5],12:i:- | GCA 3065235.1   | C2 | Newport  | GCA 2109285.1 | E | Weltevreden  | GCA 1411255.1 |
| B | 4,[5],12:i:- | GCA 974005.1    | C2 | Newport  | GCA 494485.1  | E | Weltevreden  | GCA 1409555.1 |
| B | 4,[5],12:i:- | GCA 3065815.1   | C2 | Newport  | GCA 2057085.1 | E | Weltevreden  | GCA 1410575.1 |
| B | 4,[5],12:i:- | GCA 3067365.1   | C2 | Newport  | GCA 3076975.1 | E | Weltevreden  | GCA 1410595.1 |
| B | 4,[5],12:i:- | GCA 2034965.1   | C2 | Newport  | GCA 3199565.1 | E | Weltevreden  | GCA 1410695.1 |
| B | 4,[5],12:i:- | GCA 3067255.1   | C2 | Newport  | GCA 3201015.1 | E | Weltevreden  | GCA 1410875.1 |
| B | 4,[5],12:i:- | GCA 973815.1    | C2 | Newport  | GCA 2109185.1 | E | Weltevreden  | GCA 1409375.1 |
| B | 4,[5],12:i:- | GCA 3066865.1   | C2 | Newport  | GCA 1051525.1 | E | Weltevreden  | GCA 1409915.1 |
| B | 4,[5],12:i:- | GCA 3066885.1   | C2 | Newport  | GCA 3120435.1 | E | Weltevreden  | GCA 1410075.1 |
| B | 4,[5],12:i:- | GCA 3066945.1   | C2 | Newport  | GCA 2108925.1 | E | Weltevreden  | GCA 1409675.1 |
| B | 4,[5],12:i:- | GCA 3065265.1   | C2 | Newport  | GCA 1051845.1 | E | Weltevreden  | GCA 1409835.1 |
| B | 4,[5],12:i:- | GCA 3065125.1   | C2 | Newport  | GCA 1448965.1 | E | Weltevreden  | GCA 1409935.1 |
| B | 4,[5],12:i:- | GCA 1480975.1   | C2 | Newport  | GCA 3200975.1 | E | Weltevreden  | GCA 1410175.1 |
| B | 4,[5],12:i:- | GCA 3067395.1   | C2 | Newport  | GCA 3200995.1 | E | Weltevreden  | GCA 1409135.1 |
| B | 4,[5],12:i:- | GCA 3065445.1   | C2 | Newport  | GCA 2109105.1 | E | Weltevreden  | GCA 1409155.1 |
| B | 4,[5],12:i:- | GCA 3067425.1   | C2 | Newport  | GCA 1051545.1 | E | Weltevreden  | GCA 1409175.1 |
| B | 4,[5],12:i:- | GCA 3065625.1   | C2 | Newport  | GCA 2109145.1 | E | Weltevreden  | GCA 1409195.1 |
| B | 4,[5],12:i:- | GCA 3065325.1   | C2 | Kentucky | GCA 1448485.2 | E | Weltevreden  | GCA 1612515.1 |
| B | 4,[5],12:i:- | GCA 2992165.1   | C2 | Kentucky | GCA 170195.2  | E | Weltevreden  | GCA 1410195.1 |
| B | 4,[5],12:i:- | GCA 3065555.1   | C2 | Kentucky | GCA 2065505.1 | E | Weltevreden  | GCA 1411395.1 |
| B | 4,[5],12:i:- | GCA 170255.1    | C2 | Kentucky | GCA 2064625.1 | E | Weltevreden  | GCA 1410135.1 |
| B | 4,[5],12:i:- | GCA 3065185.1   | C2 | Kentucky | GCA 171275.1  | E | Weltevreden  | GCA 1410355.1 |
| B | 4,[5],12:i:- | GCA 3067345.1   | C2 | Kentucky | GCA 2031045.1 | E | Weltevreden  | GCA 1410655.1 |
| B | 4,[5],12:i:- | GCA 3065725.1   | C2 | Kentucky | GCA 1457355.1 | E | Weltevreden  | GCA 1410855.1 |
| B | 4,[5],12:i:- | GCA 3065705.1   | C2 | Kentucky | GCA 1890835.1 | E | Weltevreden  | GCA 1409215.1 |
| B | 4,[5],12:i:- | GCA 3065515.1   | C2 | Kentucky | GCA 2065535.1 | E | Weltevreden  | GCA 1410615.1 |
| B | 4,[5],12:i:- | GCA 3067295.1   | C2 | Kentucky | GCA 2049015.1 | E | Weltevreden  | GCA 1411435.1 |
| B | 4,[5],12:i:- | GCA 3065765.1   | C2 | Kentucky | GCA 1247055.1 | E | Weltevreden  | GCA 2999895.1 |
| B | 4,[5],12:i:- | GCA 3065735.1   | C2 | Kentucky | GCA 1246115.1 | E | Weltevreden  | GCA 1409995.1 |
| B | 4,[5],12:i:- | GCA 1480365.1   | C2 | Kentucky | GCA 2030455.1 | E | Weltevreden  | GCA 2999775.1 |

|   |              |               |    |          |               |   |             |               |
|---|--------------|---------------|----|----------|---------------|---|-------------|---------------|
| B | 4,[5],12:i:- | GCA 3065455.1 | C2 | Kentucky | GCA 1246195.1 | E | Weltevreden | GCA 3000295.1 |
| B | 4,[5],12:i:- | GCA 3065645.1 | C2 | Kentucky | GCA 1247535.1 | E | Weltevreden | GCA 1409955.1 |
| B | 4,[5],12:i:- | GCA 3067245.1 | C2 | Kentucky | GCA 1247545.1 | E | Weltevreden | GCA 3000505.1 |
| B | 4,[5],12:i:- | GCA 3065505.1 | C2 | Kentucky | GCA 1245565.1 | E | Weltevreden | GCA 1410895.1 |
| B | 4,[5],12:i:- | GCA 3065545.1 | C2 | Kentucky | GCA 2064595.1 | E | Weltevreden | GCA 1410095.1 |
| B | 4,[5],12:i:- | GCA 3065585.1 | C2 | Kentucky | GCA 2050525.1 | E | Weltevreden | GCA 1411315.1 |
| B | 4,[5],12:i:- | GCA 3065275.1 | C2 | Kentucky | GCA 2064615.1 | E | Weltevreden | GCA 3000235.1 |
| B | 4,[5],12:i:- | GCA 3067215.1 | C2 | Kentucky | GCA 1241025.1 | E | Weltevreden | GCA 3000255.1 |
| B | 4,[5],12:i:- | GCA 3065685.1 | C2 | Kentucky | GCA 1247465.1 | E | Weltevreden | GCA 2999805.1 |
| B | 4,[5],12:i:- | GCA 3065665.1 | C2 | Kentucky | GCA 1481015.1 | E | Weltevreden | GCA 1410315.1 |
| B | 4,[5],12:i:- | GCA 3067285.1 | C2 | Kentucky | GCA 2030185.1 | E | Weltevreden | GCA 1410835.1 |
| B | 4,[5],12:i:- | GCA 3067385.1 | C2 | Kentucky | GCA 2031345.1 | E | Weltevreden | GCA 2999745.1 |
| B | 4,[5],12:i:- | GCA 3066925.1 | C2 | Kentucky | GCA 2062995.1 | E | Weltevreden | GCA 3000425.1 |
| B | 4,[5],12:i:- | GCA 3065845.1 | C2 | Kentucky | GCA 1479905.1 | E | Weltevreden | GCA 1409715.1 |
| B | 4,[5],12:i:- | GCA 3067325.1 | C2 | Kentucky | GCA 1246665.1 | E | Weltevreden | GCA 1409775.1 |
| B | 4,[5],12:i:- | GCA 2032235.1 | C2 | Kentucky | GCA 1247085.1 | E | Weltevreden | GCA 1410755.1 |
| B | 4,[5],12:i:- | GCA 1479815.1 | C2 | Kentucky | GCA 2283025.1 | E | Weltevreden | GCA 1410995.1 |
| B | 4,[5],12:i:- | GCA 3065785.1 | C2 | Kentucky | GCA 973755.1  | E | Weltevreden | GCA 2999845.1 |
| B | 4,[5],12:i:- | GCA 3065805.1 | C2 | Kentucky | GCA 1240725.1 | E | Weltevreden | GCA 3000575.1 |
| B | 4,[5],12:i:- | GCA 3066845.1 | C2 | Kentucky | GCA 2030465.1 | E | Weltevreden | GCA 2999735.1 |
| B | 4,12:i:-     | GCA 1240385.1 | C2 | Kentucky | GCA 1479685.1 | E | Weltevreden | GCA 3000285.1 |
| B | 4,12:i:-     | GCA 1244815.1 | C2 | Kentucky | GCA 1478715.1 | E | Weltevreden | GCA 1409975.1 |
| B | 4,12:i:-     | GCA 1246615.1 | C2 | Kentucky | GCA 1478825.1 | E | Weltevreden | GCA 1410295.1 |
| B | 4,12:i:-     | GCA 1247365.1 | C2 | Kentucky | GCA 1890825.1 | E | Weltevreden | GCA 1410375.1 |
| B | 4,12:i:-     | GCA 1271395.1 | C2 | Kentucky | GCA 2050605.1 | E | Weltevreden | GCA 1410795.1 |
| B | 4,12:i:-     | GCA 1271935.1 | C2 | Kentucky | GCA 2952975.1 | E | Weltevreden | GCA 1411235.1 |
| B | 4,12:i:-     | GCA 3140475.1 | C2 | Kentucky | GCA 3076995.1 | E | Weltevreden | GCA 2999695.1 |
| B | 4,5,12:i-    | GCA 1245255.1 | C2 | Kentucky | GCA 2885745.1 | E | Weltevreden | GCA 2999795.1 |
| B | 4,5,12:i-    | GCA 1245735.1 | C2 | Kentucky | GCA 3121055.1 | E | Weltevreden | GCA 3000555.1 |
| B | 4,5,12:i-    | GCA 1245765.1 | C2 | Kentucky | GCA 2879815.1 | E | Weltevreden | GCA 1409855.1 |
| B | 4,5,12:i-    | GCA 1245865.1 | C2 | Kentucky | GCA 1890855.1 | E | Weltevreden | GCA 1410215.1 |
| B | 4,5,12:i-    | GCA 1246945.1 | C2 | Kentucky | GCA 1480805.1 | E | Weltevreden | GCA 1410435.1 |
| B | 4,12:d:-     | GCA 2032385.1 | C2 | Kentucky | GCA 1245665.1 | E | Weltevreden | GCA 2999935.1 |
| B | 4,12:d:-     | GCA 2030235.1 | C2 | Kentucky | GCA 1480045.1 | E | Weltevreden | GCA 2999975.1 |
| B | 4,12:d:-     | GCA 2032195.1 | C2 | Kentucky | GCA 2036325.1 | E | Weltevreden | GCA 3000125.1 |
| B | 4,[5],12:r:- | GCA 2032095.1 | C2 | Kentucky | GCA 1479755.1 | E | Weltevreden | GCA 3000155.1 |
| B | 4,[5],12:r:- | GCA 2037435.1 | C2 | Kentucky | GCA 2033015.1 | E | Weltevreden | GCA 1409415.1 |
| B | 4,[5],12:r:- | GCA 2032395.1 | C2 | Kentucky | GCA 1243655.1 | E | Weltevreden | GCA 1411355.1 |
| B | 4,[5],12:r:- | GCA 2033205.1 | C2 | Kentucky | GCA 1238265.1 | E | Weltevreden | GCA 2999705.1 |
| B | 4,12:r:-     | GCA 2037385.1 | C2 | Kentucky | GCA 2036235.1 | E | Weltevreden | GCA 2999955.1 |
| B | 4,12:r:-     | GCA 2037465.1 | C2 | Kentucky | GCA 1272405.1 | E | Weltevreden | GCA 3000115.1 |
| B | Copenhagen   | GCA 2036765.1 | C2 | Kentucky | GCA 1238375.1 | E | Weltevreden | GCA 3000415.1 |
| B | Copenhagen   | GCA 2060305.1 | C2 | Kentucky | GCA 1243915.1 | E | Weltevreden | GCA 3000455.1 |
| B | Copenhagen   | GCA 2061625.1 | C2 | Kentucky | GCA 1480755.1 | E | Weltevreden | GCA 1409275.1 |
| B | Copenhagen   | GCA 2105815.1 | C2 | Kentucky | GCA 1480405.1 | E | Weltevreden | GCA 1410715.1 |
| B | Copenhagen   | GCA 3118935.1 | C2 | Kentucky | GCA 1480695.1 | E | Weltevreden | GCA 1411035.1 |
| B | Copenhagen   | GCA 3077015.1 | C2 | Kentucky | GCA 1890845.1 | E | Weltevreden | GCA 1411075.1 |
| B | Heidelberg   | GCA 1682115.1 | C2 | Kentucky | GCA 2031305.1 | E | Weltevreden | GCA 2999835.1 |
| B | Heidelberg   | GCA 1952405.1 | C2 | Kentucky | GCA 474455.1  | E | Weltevreden | GCA 3000215.1 |
| B | Heidelberg   | GCA 1246855.1 | C2 | Kentucky | GCA 1240135.1 | E | Weltevreden | GCA 3000475.1 |
| B | Heidelberg   | GCA 1952325.1 | C2 | Kentucky | GCA 1243955.1 | E | Weltevreden | GCA 3000195.1 |
| B | Heidelberg   | GCA 1723795.1 | C2 | Kentucky | GCA 1479725.1 | E | Weltevreden | GCA 3000275.1 |
| B | Heidelberg   | GCA 962525.1  | C2 | Kentucky | GCA 474315.1  | E | Weltevreden | GCA 3000335.1 |
| B | Heidelberg   | GCA 293965.1  | C2 | Kentucky | GCA 474295.1  | E | Weltevreden | GCA 3000375.1 |
| B | Heidelberg   | GCA 962075.1  | C2 | Kentucky | GCA 1241395.1 | E | Weltevreden | GCA 1409295.1 |
| B | Heidelberg   | GCA 962685.1  | C2 | Kentucky | GCA 1245465.1 | E | Weltevreden | GCA 1410035.1 |
| B | Heidelberg   | GCA 1242965.1 | C2 | Kentucky | GCA 1480595.1 | E | Weltevreden | GCA 1411135.1 |
| B | Heidelberg   | GCA 1245435.1 | C2 | Kentucky | GCA 1242995.1 | E | Weltevreden | GCA 3000075.1 |
| B | Heidelberg   | GCA 171315.1  | C2 | Kentucky | GCA 484035.1  | E | Weltevreden | GCA 1409435.1 |
| B | Heidelberg   | GCA 1240155.1 | C2 | Kentucky | GCA 1271875.1 | E | Weltevreden | GCA 3000025.1 |
| B | Heidelberg   | GCA 1246965.1 | C2 | Kentucky | GCA 1246255.1 | E | Weltevreden | GCA 1409335.1 |
| B | Heidelberg   | GCA 20705.1   | C2 | Kentucky | GCA 1244005.1 | E | Weltevreden | GCA 1409395.1 |
| B | Heidelberg   | GCA 258365.1  | C2 | Kentucky | GCA 1244715.1 | E | Weltevreden | GCA 1410775.1 |
| B | Heidelberg   | GCA 430085.2  | C2 | Kentucky | GCA 1240565.1 | E | Weltevreden | GCA 2999945.1 |
| B | Heidelberg   | GCA 430105.1  | C2 | Kentucky | GCA 2265705.1 | E | Weltevreden | GCA 3000165.1 |
| B | Heidelberg   | GCA 486045.2  | C2 | Kentucky | GCA 1243995.1 | E | Weltevreden | GCA 3000495.1 |
| B | Heidelberg   | GCA 505705.1  | C2 | Kentucky | GCA 1245105.1 | E | Weltevreden | GCA 1409635.1 |
| B | Heidelberg   | GCA 1441205.1 | C2 | Kentucky | GCA 1245955.1 | E | Weltevreden | GCA 1410935.1 |
| B | Heidelberg   | GCA 1441225.1 | C2 | Kentucky | GCA 2803695.1 | E | Weltevreden | GCA 1411195.1 |
| B | Heidelberg   | GCA 1441245.1 | C2 | Kentucky | GCA 1542215.1 | E | Weltevreden | GCA 1411215.1 |
| B | Heidelberg   | GCA 1689935.1 | C2 | Kentucky | GCA 1240465.1 | E | Weltevreden | GCA 1409875.1 |



|   |            |               |    |                  |               |   |             |               |
|---|------------|---------------|----|------------------|---------------|---|-------------|---------------|
| B | Heidelberg | GCA 1690005.1 | C2 | Kentucky         | GCA 1244185.1 | E | Weltevreden | GCA 3000515.1 |
| B | Heidelberg | GCA 1690035.1 | C2 | Kentucky         | GCA 1244155.1 | E | Weltevreden | GCA 1409355.1 |
| B | Heidelberg | GCA 1690055.1 | C2 | Kentucky         | GCA 1480715.1 | E | Weltevreden | GCA 1409755.1 |
| B | Heidelberg | GCA 1690075.1 | C2 | Kentucky         | GCA 474415.1  | E | Weltevreden | GCA 1410475.1 |
| B | Heidelberg | GCA 1690095.1 | C2 | Kentucky         | GCA 487075.1  | E | Weltevreden | GCA 1410515.1 |
| B | Heidelberg | GCA 1690115.1 | C2 | Kentucky         | GCA 1478475.1 | E | Weltevreden | GCA 1411055.1 |
| B | Heidelberg | GCA 1690135.1 | C2 | Kentucky         | GCA 1243485.1 | E | Weltevreden | GCA 3000015.1 |
| B | Heidelberg | GCA 1692495.1 | C2 | Kentucky         | GCA 336135.1  | E | Weltevreden | GCA 3000055.1 |
| B | Heidelberg | GCA 1692515.1 | C2 | Kentucky         | GCA 1478105.1 | E | Weltevreden | GCA 3000385.1 |
| B | Heidelberg | GCA 1692535.1 | C2 | Kentucky         | GCA 1479425.1 | E | Weltevreden | GCA 1409615.1 |
| B | Heidelberg | GCA 1692555.1 | C2 | Kentucky         | GCA 1480925.1 | E | Weltevreden | GCA 1410495.1 |
| B | Heidelberg | GCA 1692575.1 | C2 | Kentucky         | GCA 1240425.1 | E | Weltevreden | GCA 1410635.1 |
| B | Heidelberg | GCA 1692595.1 | C2 | Kentucky         | GCA 1242015.1 | E | Weltevreden | GCA 1409795.1 |
| B | Heidelberg | GCA 1692615.1 | C2 | Kentucky         | GCA 1542125.1 | E | Weltevreden | GCA 1410395.1 |
| B | Heidelberg | GCA 1692635.1 | C2 | Kentucky         | GCA 1242495.1 | E | Weltevreden | GCA 1410415.1 |
| B | Heidelberg | GCA 1692655.1 | C2 | Kentucky         | GCA 1480865.1 | E | Weltevreden | GCA 1410455.1 |
| B | Heidelberg | GCA 1272055.1 | C2 | Kentucky         | GCA 1479615.1 | E | Weltevreden | GCA 1411115.1 |
| B | Heidelberg | GCA 2926735.1 | C2 | Kentucky         | GCA 1238285.1 | E | Weltevreden | GCA 3000355.1 |
| B | Heidelberg | GCA 974165.1  | C2 | Kentucky         | GCA 1479745.1 | E | Weltevreden | GCA 1409495.1 |
| B | Heidelberg | GCA 2563315.1 | C2 | Kentucky         | GCA 2030345.1 | E | Weltevreden | GCA 171495.1  |
| B | Heidelberg | GCA 1246095.1 | C2 | Kentucky         | GCA 2050645.1 | E | Weltevreden | GCA 1410115.1 |
| B | Heidelberg | GCA 2264885.1 | C2 | Kentucky         | GCA 1242405.1 | E | Weltevreden | GCA 1410155.1 |
| B | Heidelberg | GCA 2926575.1 | C2 | Kentucky         | GCA 2031615.1 | E | Weltevreden | GCA 3000085.1 |
| B | Heidelberg | GCA 2926795.1 | C2 | Kentucky         | GCA 2031145.1 | E | Weltevreden | GCA 1409455.1 |
| B | Heidelberg | GCA 1246915.1 | C2 | Kentucky         | GCA 2031485.1 | E | Weltevreden | GCA 1410915.1 |
| B | Heidelberg | GCA 1247145.1 | C2 | Kentucky         | GCA 1242285.1 | E | Weltevreden | GCA 1411375.1 |
| B | Heidelberg | GCA 2926775.1 | C2 | Kentucky         | GCA 2031745.1 | E | Weltevreden | GCA 2999885.1 |
| B | Heidelberg | GCA 2926935.1 | C2 | Kentucky         | GCA 474435.1  | E | Weltevreden | GCA 1411455.1 |
| B | Heidelberg | GCA 1242885.1 | C2 | Kentucky         | GCA 1542095.1 | E | Weltevreden | GCA 1411175.1 |
| B | Heidelberg | GCA 2926595.1 | C2 | Kentucky         | GCA 3120095.1 | E | Weltevreden | GCA 1411295.1 |
| B | Heidelberg | GCA 2926835.1 | C2 | Kentucky         | GCA 1245195.1 | E | Weltevreden | GCA 1411275.1 |
| B | Heidelberg | GCA 2061515.1 | C2 | Kentucky         | GCA 1245135.1 | E | Weltevreden | GCA 1409535.1 |
| B | Heidelberg | GCA 974175.1  | C2 | Kentucky         | GCA 2803685.1 | E | Weltevreden | GCA 1409735.1 |
| B | Heidelberg | GCA 293945.1  | C2 | Bovismorbificans | GCA 499465.2  | E | Weltevreden | GCA 1411155.1 |
| B | Heidelberg | GCA 1240885.1 | C2 | Bovismorbificans | GCA 2060635.1 | E | Weltevreden | GCA 1409515.1 |
| B | Heidelberg | GCA 1241155.1 | C2 | Bovismorbificans | GCA 2060495.1 | E | Weltevreden | GCA 1410555.1 |
| B | Heidelberg | GCA 2036185.1 | C2 | Bovismorbificans | GCA 2060605.1 | E | Weltevreden | GCA 1410955.1 |
| B | Heidelberg | GCA 2064935.1 | C2 | Bovismorbificans | GCA 2049045.1 | E | Weltevreden | GCA 1410015.1 |
| B | Heidelberg | GCA 2926475.1 | C2 | Bovismorbificans | GCA 2060595.1 | E | Weltevreden | GCA 2049345.1 |
| B | Heidelberg | GCA 1952475.1 | C2 | Bovismorbificans | GCA 1126625.1 | E | Weltevreden | GCA 2050835.1 |
| B | Heidelberg | GCA 1240545.1 | C2 | Bovismorbificans | GCA 1174905.1 | E | Weltevreden | GCA 2062735.1 |
| B | Heidelberg | GCA 1242755.1 | C2 | Bovismorbificans | GCA 1321645.1 | E | Weltevreden | GCA 2050595.1 |
| B | Heidelberg | GCA 1245845.1 | C2 | Bovismorbificans | GCA 2061715.1 | E | Weltevreden | GCA 2050715.1 |
| B | Heidelberg | GCA 2926615.1 | C2 | Bovismorbificans | GCA 2061735.1 | E | Weltevreden | GCA 1410815.1 |
| B | Heidelberg | GCA 700765.1  | C2 | Bovismorbificans | GCA 2060515.1 | E | Anatum      | GCA 1726095.1 |
| B | Heidelberg | GCA 699605.1  | C2 | Bovismorbificans | GCA 1087425.1 | E | Anatum      | GCA 1247355.1 |
| B | Heidelberg | GCA 293925.1  | C2 | Bovismorbificans | GCA 2061695.1 | E | Anatum      | GCA 1835345.1 |
| B | Heidelberg | GCA 1477675.1 | C2 | Bovismorbificans | GCA 1083855.1 | E | Anatum      | GCA 412875.1  |
| B | Heidelberg | GCA 962655.1  | C2 | Bovismorbificans | GCA 2061775.1 | E | Anatum      | GCA 1241205.1 |
| B | Heidelberg | GCA 2926375.1 | C2 | Bovismorbificans | GCA 2060575.1 | E | Anatum      | GCA 1481105.1 |
| B | Heidelberg | GCA 256625.1  | C2 | Bovismorbificans | GCA 1111645.1 | E | Anatum      | GCA 2060035.1 |
| B | Heidelberg | GCA 603545.1  | C2 | Bovismorbificans | GCA 2050935.1 | E | Anatum      | GCA 2066255.1 |
| B | Heidelberg | GCA 961995.1  | C2 | Bovismorbificans | GCA 1123425.1 | E | Anatum      | GCA 2066235.1 |
| B | Heidelberg | GCA 1242865.1 | C2 | Bovismorbificans | GCA 1174385.1 | E | Anatum      | GCA 1478355.1 |
| B | Heidelberg | GCA 2264985.1 | C2 | Bovismorbificans | GCA 1172165.1 | E | Anatum      | GCA 1479145.1 |
| B | Heidelberg | GCA 974205.1  | C2 | Bovismorbificans | GCA 1155245.1 | E | Anatum      | GCA 2061315.1 |
| B | Heidelberg | GCA 962085.1  | C2 | Bovismorbificans | GCA 1213485.1 | E | Anatum      | GCA 2032815.1 |
| B | Heidelberg | GCA 1241275.1 | C2 | Bovismorbificans | GCA 1159165.1 | E | Anatum      | GCA 2059595.1 |
| B | Heidelberg | GCA 1243065.1 | C2 | Bovismorbificans | GCA 1213345.1 | E | Anatum      | GCA 2059305.1 |
| B | Heidelberg | GCA 1243875.1 | C2 | Bovismorbificans | GCA 2050735.1 | E | Anatum      | GCA 2058525.1 |
| B | Heidelberg | GCA 486085.1  | C2 | Bovismorbificans | GCA 524965.2  | E | Anatum      | GCA 2060115.1 |
| B | Heidelberg | GCA 603325.1  | C2 | Bovismorbificans | GCA 2062655.1 | E | Anatum      | GCA 487575.2  |
| B | Heidelberg | GCA 2926655.1 | C2 | Bovismorbificans | GCA 524785.1  | E | Anatum      | GCA 940895.2  |
| B | Heidelberg | GCA 1241845.1 | C2 | Bovismorbificans | GCA 524845.1  | E | Anatum      | GCA 963535.2  |
| B | Heidelberg | GCA 2926715.1 | C2 | Bovismorbificans | GCA 524945.1  | E | Anatum      | GCA 988525.3  |
| B | Heidelberg | GCA 962625.1  | C2 | Bovismorbificans | GCA 524865.1  | E | Anatum      | GCA 1447095.1 |
| B | Heidelberg | GCA 603305.1  | C2 | Bovismorbificans | GCA 524725.1  | E | Anatum      | GCA 1447115.1 |
| B | Heidelberg | GCA 1241305.1 | C2 | Bovismorbificans | GCA 1213645.1 | E | Anatum      | GCA 1620115.1 |
| B | Heidelberg | GCA 1479435.1 | C2 | Bovismorbificans | GCA 1172045.1 | E | Anatum      | GCA 1620135.2 |
| B | Heidelberg | GCA 2926495.1 | C2 | Bovismorbificans | GCA 1114865.1 | E | Anatum      | GCA 1620155.1 |
| B | Heidelberg | GCA 1952565.1 | C2 | Bovismorbificans | GCA 524415.1  | E | Anatum      | GCA 1620205.2 |

|   |            |               |    |                  |               |   |          |               |
|---|------------|---------------|----|------------------|---------------|---|----------|---------------|
| B | Heidelberg | GCA 1247585.1 | C2 | Bovismorbificans | GCA 524925.1  | E | Anatum   | GCA 1620225.1 |
| B | Heidelberg | GCA 2037295.1 | C2 | Bovismorbificans | GCA 524705.1  | E | Anatum   | GCA 1623545.2 |
| B | Heidelberg | GCA 2926515.1 | C2 | Bovismorbificans | GCA 524765.1  | E | Anatum   | GCA 1623585.1 |
| B | Heidelberg | GCA 1244225.1 | C2 | Bovismorbificans | GCA 3079135.1 | E | Anatum   | GCA 1623625.1 |
| B | Heidelberg | GCA 1478705.1 | C2 | Bovismorbificans | GCA 1215185.1 | E | Anatum   | GCA 1623665.2 |
| B | Heidelberg | GCA 1478965.1 | C2 | Bovismorbificans | GCA 524745.1  | E | Anatum   | GCA 3119765.1 |
| B | Heidelberg | GCA 2032425.1 | C2 | Bovismorbificans | GCA 524805.1  | E | Anatum   | GCA 3077075.1 |
| B | Heidelberg | GCA 2926435.1 | C2 | Bovismorbificans | GCA 524905.1  | E | Anatum   | GCA 3118955.1 |
| B | Heidelberg | GCA 2926555.1 | C2 | Bovismorbificans | GCA 1126725.1 | E | Anatum   | GCA 3119975.1 |
| B | Heidelberg | GCA 2926645.1 | C2 | Bovismorbificans | GCA 524825.1  | E | Anatum   | GCA 3118175.1 |
| B | Heidelberg | GCA 2926895.1 | C2 | Hadar            | GCA 1448685.1 | E | Anatum   | GCA 3120795.1 |
| B | Heidelberg | GCA 1242675.1 | C2 | Hadar            | GCA 2065715.1 | E | Anatum   | GCA 3078395.1 |
| B | Heidelberg | GCA 2926845.1 | C2 | Hadar            | GCA 974135.1  | E | Anatum   | GCA 3119715.1 |
| B | Heidelberg | GCA 1241455.1 | C2 | Hadar            | GCA 2266305.1 | E | Anatum   | GCA 3119565.1 |
| B | Heidelberg | GCA 1243585.1 | C2 | Hadar            | GCA 171515.1  | E | Anatum   | GCA 3078135.1 |
| B | Heidelberg | GCA 1479485.1 | C2 | Hadar            | GCA 1246485.1 | E | Anatum   | GCA 3117515.1 |
| B | Heidelberg | GCA 1479665.1 | C2 | Hadar            | GCA 1246495.1 | E | Anatum   | GCA 3120015.1 |
| B | Heidelberg | GCA 2037505.1 | C2 | Hadar            | GCA 2032945.1 | E | Anatum   | GCA 3118155.1 |
| B | Heidelberg | GCA 293905.1  | C2 | Hadar            | GCA 2065635.1 | E | Anatum   | GCA 3120555.1 |
| B | Heidelberg | GCA 603285.1  | C2 | Hadar            | GCA 293095.1  | E | Anatum   | GCA 3077155.1 |
| B | Heidelberg | GCA 2926395.1 | C2 | Hadar            | GCA 1245555.1 | E | Anatum   | GCA 3120115.1 |
| B | Heidelberg | GCA 2926695.1 | C2 | Hadar            | GCA 1246435.1 | E | Anatum   | GCA 3077095.1 |
| B | Heidelberg | GCA 700785.1  | C2 | Hadar            | GCA 1479865.1 | E | Anatum   | GCA 3118315.1 |
| B | Heidelberg | GCA 1241725.1 | C2 | Hadar            | GCA 1241115.1 | E | Anatum   | GCA 3119555.1 |
| B | Heidelberg | GCA 2926745.1 | C2 | Hadar            | GCA 1246475.1 | E | Anatum   | GCA 3117575.1 |
| B | Heidelberg | GCA 2037355.1 | C2 | Hadar            | GCA 973745.1  | E | Anatum   | GCA 3120975.1 |
| B | Heidelberg | GCA 1241625.1 | C2 | Hadar            | GCA 2031055.1 | E | Anatum   | GCA 3117635.1 |
| B | Heidelberg | GCA 2926295.1 | C2 | Hadar            | GCA 2035955.1 | E | Anatum   | GCA 3117165.1 |
| B | Heidelberg | GCA 2926455.1 | C2 | Hadar            | GCA 1480605.1 | E | Anatum   | GCA 3120275.1 |
| B | Heidelberg | GCA 962025.1  | C2 | Hadar            | GCA 973775.1  | E | Anatum   | GCA 3077055.1 |
| B | Heidelberg | GCA 962555.1  | C2 | Hadar            | GCA 1241055.1 | E | Anatum   | GCA 3119295.1 |
| B | Heidelberg | GCA 1480445.1 | C2 | Hadar            | GCA 1246355.1 | E | Anatum   | GCA 3077175.1 |
| B | Heidelberg | GCA 1246035.1 | C2 | Hadar            | GCA 1246765.1 | E | Anatum   | GCA 3077275.1 |
| B | Heidelberg | GCA 284755.1  | C2 | Hadar            | GCA 2030665.1 | E | Anatum   | GCA 3117215.1 |
| B | Heidelberg | GCA 962485.1  | C2 | Hadar            | GCA 487175.1  | E | Anatum   | GCA 3117735.1 |
| B | Heidelberg | GCA 1271555.1 | C2 | Hadar            | GCA 1242005.1 | E | Anatum   | GCA 3117015.1 |
| B | Heidelberg | GCA 1480665.1 | C2 | Hadar            | GCA 1477965.1 | E | Anatum   | GCA 3121215.1 |
| B | Heidelberg | GCA 2036305.1 | C2 | Hadar            | GCA 2031825.1 | E | Anatum   | GCA 3117065.1 |
| B | Heidelberg | GCA 603585.1  | C2 | Hadar            | GCA 1243355.1 | E | Anatum   | GCA 3121075.1 |
| B | Heidelberg | GCA 1479265.1 | C2 | Hadar            | GCA 1243705.1 | E | Anatum   | GCA 3120995.1 |
| B | Heidelberg | GCA 2926355.1 | C2 | Hadar            | GCA 412915.1  | E | Muenster | GCA 2034315.1 |
| B | Heidelberg | GCA 1478945.1 | C2 | Hadar            | GCA 1242445.1 | E | Muenster | GCA 2050875.1 |
| B | Heidelberg | GCA 603605.1  | C2 | Hadar            | GCA 1243605.1 | E | Muenster | GCA 2062165.1 |
| B | Heidelberg | GCA 1240635.1 | C2 | Hadar            | GCA 1479565.1 | E | Muenster | GCA 2050495.1 |
| B | Heidelberg | GCA 2926635.1 | C2 | Hadar            | GCA 1477755.1 | E | Muenster | GCA 1246125.1 |
| B | Heidelberg | GCA 962725.1  | C2 | Hadar            | GCA 1477835.1 | E | Muenster | GCA 487015.1  |
| B | Heidelberg | GCA 603785.1  | C2 | Hadar            | GCA 1478535.1 | E | Muenster | GCA 2050685.1 |
| B | Heidelberg | GCA 699625.1  | C2 | Hadar            | GCA 1479605.1 | E | Muenster | GCA 2064315.1 |
| B | Heidelberg | GCA 1272375.1 | C2 | Hadar            | GCA 2283205.1 | E | Muenster | GCA 2050585.1 |
| B | Heidelberg | GCA 2037425.1 | C2 | Hadar            | GCA 2058685.1 | E | Muenster | GCA 2062055.1 |
| B | Heidelberg | GCA 2926875.1 | C2 | Hadar            | GCA 1245215.1 | E | Muenster | GCA 1477695.1 |
| B | Heidelberg | GCA 486065.1  | C2 | Muenchen         | GCA 1692085.1 | E | Muenster | GCA 2062205.1 |
| B | Heidelberg | GCA 1241105.1 | C2 | Muenchen         | GCA 2034335.1 | E | Muenster | GCA 483855.1  |
| B | Heidelberg | GCA 1479585.1 | C2 | Muenchen         | GCA 1834175.1 | E | Muenster | GCA 2065425.1 |
| B | Heidelberg | GCA 603685.1  | C2 | Muenchen         | GCA 2943795.1 | E | Muenster | GCA 487035.2  |
| B | Heidelberg | GCA 1245965.1 | C2 | Muenchen         | GCA 1692005.1 | E | Muenster | GCA 505485.1  |
| B | Heidelberg | GCA 1478185.1 | C2 | Muenchen         | GCA 1834055.1 | E | Muenster | GCA 1246125.1 |
| B | Heidelberg | GCA 1240145.1 | C2 | Muenchen         | GCA 1834085.1 | E | Muenster | GCA 1477695.1 |
| B | Heidelberg | GCA 2926905.1 | C2 | Muenchen         | GCA 1834365.1 | E | Muenster | GCA 2034315.1 |
| B | Heidelberg | GCA 603505.1  | C2 | Muenchen         | GCA 1834575.1 | E | Muenster | GCA 2050495.1 |
| B | Heidelberg | GCA 2062495.1 | C2 | Muenchen         | GCA 486325.1  | E | Muenster | GCA 2050685.1 |
| B | Heidelberg | GCA 2260805.1 | C2 | Muenchen         | GCA 1242505.1 | E | Muenster | GCA 2050875.1 |
| B | Heidelberg | GCA 2926275.1 | C2 | Muenchen         | GCA 1243235.1 | E | Muenster | GCA 2062055.1 |
| B | Heidelberg | GCA 603365.1  | C2 | Muenchen         | GCA 1834045.1 | E | Muenster | GCA 2062165.1 |
| B | Heidelberg | GCA 2926535.1 | C2 | Muenchen         | GCA 2064365.1 | E | Muenster | GCA 3072675.1 |
| B | Heidelberg | GCA 1241355.1 | C2 | Muenchen         | GCA 1245945.1 | E | Muenster | GCA 3072725.1 |
| B | Heidelberg | GCA 2265745.1 | C2 | Muenchen         | GCA 1878985.1 | E | Muenster | GCA 3072765.1 |
| B | Heidelberg | GCA 962605.1  | C2 | Muenchen         | GCA 3118915.1 | E | Muenster | GCA 3072805.1 |
| B | Heidelberg | GCA 2926815.1 | C2 | Muenchen         | GCA 1834155.1 | E | Give     | GCA 2266215.1 |
| B | Heidelberg | GCA 284795.1  | C2 | Muenchen         | GCA 1833235.1 | E | Give     | GCA 487215.1  |
| B | Heidelberg | GCA 1478505.1 | C2 | Muenchen         | GCA 1481325.1 | E | Give     | GCA 732045.1  |

|   |            |               |    |            |               |   |             |               |
|---|------------|---------------|----|------------|---------------|---|-------------|---------------|
| B | Heidelberg | GCA 2060215.1 | C2 | Muenchen   | GCA 2241555.2 | E | Give        | GCA 2106825.1 |
| B | Heidelberg | GCA 603725.1  | C2 | Muenchen   | GCA 1240705.1 | E | Give        | GCA 2107545.1 |
| B | Heidelberg | GCA 2926405.1 | C2 | Muenchen   | GCA 1241675.1 | E | Give        | GCA 2106715.1 |
| B | Heidelberg | GCA 1478975.1 | C2 | Muenchen   | GCA 2059525.1 | E | Give        | GCA 2105965.1 |
| B | Heidelberg | GCA 2062895.1 | C2 | Muenchen   | GCA 1247375.1 | E | Give        | GCA 2105985.1 |
| B | Heidelberg | GCA 1240675.1 | C2 | Muenchen   | GCA 1247595.1 | E | Give        | GCA 2107415.1 |
| B | Heidelberg | GCA 2265815.1 | C2 | Muenchen   | GCA 1834725.1 | E | Give        | GCA 2065645.1 |
| B | Heidelberg | GCA 962405.1  | C2 | Muenchen   | GCA 2060015.1 | E | Give        | GCA 1878895.1 |
| B | Heidelberg | GCA 603525.1  | C2 | Muenchen   | GCA 2241595.2 | E | Give        | GCA 505465.1  |
| B | Heidelberg | GCA 962695.1  | C2 | Muenchen   | GCA 2241655.2 | E | Give        | GCA 2863765.1 |
| B | Heidelberg | GCA 1245035.1 | C2 | Muenchen   | GCA 2241795.2 | E | Give        | GCA 505465.1  |
| B | Heidelberg | GCA 962475.1  | C2 | Muenchen   | GCA 2241855.2 | E | Give        | GCA 2107415.1 |
| B | Heidelberg | GCA 1246805.1 | C2 | Muenchen   | GCA 1242125.1 | E | Give        | GCA 2266215.1 |
| B | Heidelberg | GCA 1247075.1 | C2 | Muenchen   | GCA 1246885.1 | E | Give        | GCA 3117975.1 |
| B | Heidelberg | GCA 2915375.1 | C2 | Muenchen   | GCA 1834145.1 | E | Give        | GCA 3118135.1 |
| B | Heidelberg | GCA 2915405.1 | C2 | Muenchen   | GCA 3119515.1 | E | London      | GCA 2063165.1 |
| B | Heidelberg | GCA 603705.1  | C2 | Muenchen   | GCA 486955.1  | E | London      | GCA 2064515.1 |
| B | Heidelberg | GCA 1245005.1 | C2 | Muenchen   | GCA 1834245.1 | E | London      | GCA 2047355.1 |
| B | Heidelberg | GCA 601395.1  | C2 | Muenchen   | GCA 1834325.1 | E | London      | GCA 2048305.1 |
| B | Heidelberg | GCA 1245935.1 | C2 | Muenchen   | GCA 1245635.1 | E | London      | GCA 1479935.1 |
| B | Heidelberg | GCA 603765.1  | C2 | Muenchen   | GCA 1240835.1 | E | Meleagridis | GCA 2044745.1 |
| B | Heidelberg | GCA 603845.1  | C2 | Muenchen   | GCA 1834095.1 | E | Meleagridis | GCA 2044885.1 |
| B | Heidelberg | GCA 1242785.1 | C2 | Muenchen   | GCA 2241775.2 | E | Meleagridis | GCA 2045015.1 |
| B | Heidelberg | GCA 1272325.1 | C2 | Muenchen   | GCA 2031245.1 | E | Meleagridis | GCA 2046085.1 |
| B | Heidelberg | GCA 1242195.1 | C2 | Muenchen   | GCA 1240125.1 | E | Meleagridis | GCA 2044805.1 |
| B | Heidelberg | GCA 603665.1  | C2 | Muenchen   | GCA 2263325.1 | E | Meleagridis | GCA 2063075.1 |
| B | Heidelberg | GCA 2261085.1 | C2 | Muenchen   | GCA 1243615.1 | E | Meleagridis | GCA 486835.1  |
| B | Heidelberg | GCA 284775.1  | C2 | Muenchen   | GCA 1832485.1 | E | Meleagridis | GCA 3120595.1 |
| B | Heidelberg | GCA 962435.1  | C2 | Muenchen   | GCA 2241805.2 | E | Meleagridis | GCA 3120715.1 |
| B | Heidelberg | GCA 603345.3  | C2 | Muenchen   | GCA 1835095.1 | E | Uganda      | GCA 2030165.1 |
| B | Heidelberg | GCA 962295.1  | C2 | Muenchen   | GCA 1479965.1 | E | Uganda      | GCA 2063615.1 |
| B | Heidelberg | GCA 1242645.1 | C2 | Muenchen   | GCA 1481135.1 | E | Uganda      | GCA 2048685.1 |
| B | Heidelberg | GCA 2915395.1 | C2 | Muenchen   | GCA 2263315.1 | E | Uganda      | GCA 2047575.1 |
| B | Heidelberg | GCA 2926285.1 | C2 | Muenchen   | GCA 2241835.2 | E | Uganda      | GCA 2047785.1 |
| B | Heidelberg | GCA 962365.1  | C2 | Muenchen   | GCA 2059695.1 | E | Uganda      | GCA 2047505.1 |
| B | Heidelberg | GCA 603745.1  | C2 | Muenchen   | GCA 1240345.1 | E | Senftenberg | GCA 1247445.1 |
| B | Heidelberg | GCA 601415.1  | C2 | Muenchen   | GCA 412795.1  | E | Senftenberg | GCA 1246655.1 |
| B | Heidelberg | GCA 284815.1  | C2 | Muenchen   | GCA 2059995.1 | E | Senftenberg | GCA 486465.1  |
| B | Heidelberg | GCA 603825.1  | C2 | Muenchen   | GCA 1244895.1 | E | Senftenberg | GCA 1479095.1 |
| B | Heidelberg | GCA 962145.1  | C2 | Muenchen   | GCA 2059935.1 | E | Senftenberg | GCA 1276765.1 |
| B | Heidelberg | GCA 2265715.1 | C2 | Muenchen   | GCA 464895.1  | E | Senftenberg | GCA 2031375.1 |
| B | Heidelberg | GCA 962515.1  | C2 | Muenchen   | GCA 412815.1  | E | Senftenberg | GCA 486505.1  |
| B | Heidelberg | GCA 603865.1  | C2 | Muenchen   | GCA 2059945.1 | E | Senftenberg | GCA 1276925.1 |
| B | Heidelberg | GCA 962595.1  | C2 | Albany     | GCA 2032745.1 | E | Senftenberg | GCA 2030925.1 |
| B | Heidelberg | GCA 464935.1  | C2 | Albany     | GCA 1246755.1 | E | Senftenberg | GCA 1276775.1 |
| B | Heidelberg | GCA 962395.1  | C2 | Albany     | GCA 2048105.1 | E | Senftenberg | GCA 1240395.1 |
| B | Heidelberg | GCA 603385.1  | C2 | Albany     | GCA 1243145.1 | E | Senftenberg | GCA 484435.1  |
| B | Heidelberg | GCA 1481095.1 | C2 | Albany     | GCA 1479845.1 | E | Senftenberg | GCA 1276745.1 |
| B | Heidelberg | GCA 2037325.1 | C2 | Albany     | GCA 1241765.1 | E | Senftenberg | GCA 486875.1  |
| B | Heidelberg | GCA 1245655.1 | C2 | Albany     | GCA 2047035.1 | E | Senftenberg | GCA 1479465.1 |
| B | Heidelberg | GCA 2270265.1 | C2 | Albany     | GCA 2046575.1 | E | Senftenberg | GCA 1479525.1 |
| B | Heidelberg | GCA 603645.1  | C2 | Albany     | GCA 2062195.1 | E | Senftenberg | GCA 1478905.1 |
| B | Heidelberg | GCA 962445.1  | C2 | Albany     | GCA 2071615.1 | E | Senftenberg | GCA 1478345.1 |
| B | Heidelberg | GCA 962115.1  | C2 | Albany     | GCA 2283235.1 | E | Senftenberg | GCA 2031755.1 |
| B | Heidelberg | GCA 962565.1  | C2 | Albany     | GCA 1244795.1 | E | Senftenberg | GCA 486975.1  |
| B | Heidelberg | GCA 962175.1  | C2 | Albany     | GCA 2047105.1 | E | Senftenberg | GCA 1481035.1 |
| B | Agona      | GCA 494505.1  | C2 | Albany     | GCA 487515.2  | E | Senftenberg | GCA 2270335.1 |
| B | Agona      | GCA 2033225.1 | C2 | Albany     | GCA 3047335.1 | E | Senftenberg | GCA 263295.1  |
| B | Agona      | GCA 494325.1  | C2 | Kottbus    | GCA 2044865.1 | E | Senftenberg | GCA 483995.1  |
| B | Agona      | GCA 487555.1  | C2 | Kottbus    | GCA 2045115.1 | E | Senftenberg | GCA 1477795.1 |
| B | Agona      | GCA 484115.1  | C2 | Kottbus    | GCA 2045035.1 | E | Senftenberg | GCA 1478295.1 |
| B | Agona      | GCA 487495.1  | C2 | Litchfield | GCA 1477885.1 | E | Senftenberg | GCA 1276825.1 |
| B | Agona      | GCA 484255.1  | C2 | Litchfield | GCA 1243175.1 | E | Senftenberg | GCA 1479005.1 |
| B | Agona      | GCA 483895.1  | C2 | Litchfield | GCA 2107495.1 | E | Senftenberg | GCA 2270405.1 |
| B | Agona      | GCA 484235.1  | C2 | Litchfield | GCA 2063035.1 | E | Senftenberg | GCA 1457675.1 |
| B | Agona      | GCA 484395.1  | C2 | Litchfield | GCA 2064575.1 | E | Senftenberg | GCA 1969425.1 |
| B | Agona      | GCA 484095.1  | C2 | Litchfield | GCA 2064525.1 | E | Senftenberg | GCA 486525.2  |
| B | Agona      | GCA 494445.1  | C2 | Litchfield | GCA 1243305.1 | E | Senftenberg | GCA 2953175.1 |
| B | Agona      | GCA 483815.1  | C2 | Litchfield | GCA 1241815.1 | E | Senftenberg | GCA 483995.1  |
| B | Agona      | GCA 330625.1  | C2 | Litchfield | GCA 487855.1  | E | Krefeld     | GCA 1975445.1 |
| B | Agona      | GCA 484135.1  | C2 | Litchfield | GCA 2059605.1 | E | Liverpool   | GCA 1242905.1 |

|   |       |               |    |            |               |     |               |               |
|---|-------|---------------|----|------------|---------------|-----|---------------|---------------|
| B | Agona | GCA 487535.1  | C2 | Litchfield | GCA 2030935.1 | E   | Liverpool     | GCA 1245755.1 |
| B | Agona | GCA 2106835.1 | C2 | Litchfield | GCA 1479305.1 | E   | Liverpool     | GCA 2061095.1 |
| B | Agona | GCA 484415.1  | C2 | Litchfield | GCA 1243325.1 | A   | Paratyphi A   | GCA 11885.1   |
| B | Agona | GCA 330645.1  | C2 | Litchfield | GCA 2058745.1 | A   | Paratyphi A   | GCA 486725.2  |
| B | Agona | GCA 487475.1  | C2 | Manhattan  | GCA 2234795.1 | A   | Koessen       | GCA 1975425.1 |
| B | Agona | GCA 1480835.1 | C2 | Manhattan  | GCA 1448765.1 | A   | Nitra         | GCA 1975605.1 |
| B | Agona | GCA 484155.1  | C2 | Manhattan  | GCA 430975.2  | F   | Rubislaw      | GCA 1448845.1 |
| B | Agona | GCA 2031865.1 | C2 | Manhattan  | GCA 2064535.1 | F   | Rubislaw      | GCA 486585.2  |
| B | Agona | GCA 2056815.1 | C2 | Manhattan  | GCA 2049165.1 | F   | Worthington   | GCA 1242245.1 |
| B | Agona | GCA 494365.1  | C2 | Manhattan  | GCA 3078335.1 | F   | Worthington   | GCA 2046845.1 |
| B | Agona | GCA 494425.1  | C2 | Corvallis  | GCA 2265865.1 | F   | Abatetuba     | GCA 487915.2  |
| B | Agona | GCA 1240875.1 | C2 | Corvallis  | GCA 2066565.1 | F   | Aberdeen      | GCA 2283215.1 |
| B | Agona | GCA 494465.1  | C2 | Corvallis  | GCA 2045955.1 | G   | Cubana        | GCA 2046285.1 |
| B | Agona | GCA 484175.1  | C2 | Corvallis  | GCA 2045985.1 | G   | Cubana        | GCA 430125.1  |
| B | Agona | GCA 330665.1  | C2 | Corvallis  | GCA 2063295.1 | K   | Cerro         | GCA 505365.2  |
| B | Agona | GCA 1244085.1 | C2 | Corvallis  | GCA 2062535.1 | K   | Cerro         | GCA 1941405.1 |
| B | Agona | GCA 494405.1  | C2 | Corvallis  | GCA 3071545.1 | L   | Minnesota     | GCA 486855.2  |
| B | Agona | GCA 494345.1  | C2 | Blockley   | GCA 2045305.1 | L   | Minnesota     | GCA 2196535.1 |
| B | Agona | GCA 483935.1  | C2 | Blockley   | GCA 2045325.1 | M   | Pomona        | GCA 2048725.1 |
| B | Agona | GCA 1479025.1 | C2 | Blockley   | GCA 2048695.1 | M   | Pomona        | GCA 2049235.1 |
| B | Agona | GCA 2056865.1 | C2 | Blockley   | GCA 2049195.1 | M   | Adelaide      | GCA 2049335.1 |
| B | Agona | GCA 20885.1   | C2 | Blockley   | GCA 2283055.1 | M   | Adelaide      | GCA 1999405.1 |
| B | Agona | GCA 484195.2  | C2 | Blockley   | GCA 2283115.1 | O   | Monschau      | GCA 2045005.1 |
| B | Agona | GCA 494385.2  | C2 | Bardo      | GCA 1975305.1 | O   | Monschau      | GCA 2045845.1 |
| B | Agona | GCA 503845.1  | C2 | Bardo      | GCA 2066175.1 | O   | Ealing        | GCA 2265925.1 |
| B | Agona | GCA 2057025.1 | C2 | Bardo      | GCA 2241535.2 | O   | Ealing        | GCA 2046005.1 |
| B | Agona | GCA 2057015.1 | C2 | Glostrup   | GCA 2265965.1 | P   | Inverness     | GCA 2034735.1 |
| B | Agona | GCA 483875.1  | C2 | Takoradi   | GCA 2266045.1 | P   | Inverness     | GCA 487155.2  |
| B | Agona | GCA 2031215.1 | C2 | Manchester | GCA 1975515.1 | R   | Johannesburg  | GCA 2034785.1 |
| B | Agona | GCA 1480635.1 | C2 | Yovokome   | GCA 1975645.1 | R   | Johannesburg  | GCA 1975405.1 |
| B | Agona | GCA 484315.1  | D  | Dublin     | GCA 192085.1  | Q   | Wandsworth    | GCA 1975625.1 |
| B | Agona | GCA 484055.1  | D  | Dublin     | GCA 1448615.1 | H   | Onderstepoort | GCA 2208255.1 |
| B | Agona | GCA 484075.1  | D  | Dublin     | GCA 336015.1  | I   | Gaminara      | GCA 2741885.1 |
| B | Agona | GCA 1479085.1 | D  | Dublin     | GCA 414745.2  | I   | Tees          | GCA 2265995.1 |
| B | Agona | GCA 2062875.1 | D  | Dublin     | GCA 353305.2  | S   | Waycross      | GCA 2211845.1 |
| B | Agona | GCA 1478405.1 | D  | Dublin     | GCA 20925.1   | T   | Weslaco       | GCA 1448905.1 |
| B | Agona | GCA 3120635.1 | D  | Dublin     | GCA 1953035.1 | V   | Quebec        | GCA 2208315.1 |
| B | Agona | GCA 1477685.1 | D  | Dublin     | GCA 953175.1  | W   | Apapa         | GCA 1975285.1 |
| B | Agona | GCA 3117295.1 | D  | Dublin     | GCA 3069985.1 | X   | Bergen        | GCA 1975325.1 |
| B | Agona | GCA 2106735.1 | D  | Dublin     | GCA 2266085.1 | Y   | Djakarta      | GCA 1975365.1 |
| B | Agona | GCA 484375.1  | D  | Dublin     | GCA 3070425.1 | O51 | Antsalova     | GCA 1956735.1 |
| B | Agona | GCA 3118725.1 | D  | Dublin     | GCA 3069635.1 | O54 | Borreze       | GCA 1975345.1 |
| B | Agona | GCA 2031425.1 | D  | Dublin     | GCA 3066325.1 | O67 | Crossness     | GCA 1975245.1 |

**Table S2** Bacterial strains used in specificity tests for *Salmonella* serogroups and PCR results.

| Serogroup         | Strains                  |  | Source *          | Number | PCR results & |   |   |   |   |
|-------------------|--------------------------|--|-------------------|--------|---------------|---|---|---|---|
|                   | Serovar                  |  |                   |        | 1             | 2 | 3 | 4 | 5 |
| <i>Salmonella</i> |                          |  |                   |        |               |   |   |   |   |
| A                 | <i>S. Paratyphi A</i>    |  | CMCC(B) 50093     | 1      | -             | - | - | - | - |
| B                 | <i>S. Typhimurium</i>    |  | Laboratory strain | 3      | +             | - | - | - | - |
| B                 | <i>S. Indiana</i>        |  | Laboratory strain | 3      | +             | - | - | - | - |
| B                 | <i>S. Derby</i>          |  | Laboratory strain | 3      | +             | - | - | - | - |
| B                 | <i>S. Agona</i>          |  | Laboratory strain | 3      | +             | - | - | - | - |
| B                 | <i>S. Saintpaul</i>      |  | Laboratory strain | 3      | +             | - | - | - | - |
| B                 | <i>S. Stanley</i>        |  | Laboratory strain | 3      | +             | - | - | - | - |
| B                 | <i>S. Heidelberg</i>     |  | Laboratory strain | 1      | +             | - | - | - | - |
| B                 | <i>S. Lagos</i>          |  | Laboratory strain | 1      | +             | - | - | - | - |
| B                 | <i>S. ParatyphiB</i>     |  | CMCC(B) 5004      | 1      | +             | - | - | - | - |
| B                 | <i>S. Kaapstad</i>       |  | Laboratory strain | 1      | +             | - | - | - | - |
| B                 | <i>S. Schwarzengrund</i> |  | Laboratory strain | 3      | +             | - | - | - | - |
| C1                | <i>S. Lomita</i>         |  | Laboratory strain | 3      | -             | + | - | - | - |
| C1                | <i>S. Braenderup</i>     |  | Laboratory strain | 3      | -             | + | - | - | - |
| C1                | <i>S. Isangi</i>         |  | Laboratory strain | 3      | -             | + | - | - | - |

|                |                            |                   |   |   |   |   |   |   |
|----------------|----------------------------|-------------------|---|---|---|---|---|---|
| C1             | <i>S. Thompson</i>         | CMCC(B) 20023     | 1 | - | + | - | - | - |
| C1             | <i>S. Thompson</i>         | Laboratory strain | 2 | - | + | - | - | - |
| C1             | <i>S. Rissen</i>           | Laboratory strain | 3 | - | + | - | - | - |
| C1             | <i>S. Infantis</i>         | Laboratory strain | 3 | - | + | - | - | - |
| C1             | <i>S. Montevideo</i>       | Laboratory strain | 2 | - | + | - | - | - |
| C1             | <i>S. Bareilly</i>         | Laboratory strain | 2 | - | + | - | - | - |
| C1             | <i>S. Mbandaka</i>         | Laboratory strain | 1 | - | + | - | - | - |
| C1             | <i>S. Riggil</i>           | Laboratory strain | 1 | - | + | - | - | - |
| C1             | <i>S. Virchow</i>          | Laboratory strain | 3 | - | + | - | - | - |
| C1             | <i>S. Eingedi</i>          | Laboratory strain | 1 | - | + | - | - | - |
| C1             | <i>S. Singapore</i>        | Laboratory strain | 2 | - | + | - | - | - |
| C1             | <i>S. Potsdam</i>          | Laboratory strain | 3 | - | + | - | - | - |
| C2             | <i>S. Muenchen</i>         | Laboratory strain | 1 | - | - | + | - | - |
| C2             | <i>S. Goldcoast</i>        | Laboratory strain | 3 | - | - | + | - | - |
| C2             | <i>S. Manhattan</i>        | Laboratory strain | 3 | - | - | + | - | - |
| C2             | <i>S. Corvallis</i>        | Laboratory strain | 3 | - | - | + | - | - |
| C2             | <i>S. Newport</i>          | Laboratory strain | 3 | - | - | + | - | - |
| C2             | <i>S. Hadar</i>            | Laboratory strain | 3 | - | - | + | - | - |
| C2             | <i>S. Albany</i>           | Laboratory strain | 3 | - | - | + | - | - |
| C2             | <i>S. Kottbus</i>          | Laboratory strain | 3 | - | - | + | - | - |
| C2             | <i>S. Istanbul</i>         | Laboratory strain | 3 | - | - | + | - | - |
| C2             | <i>S. Tallahassee</i>      | Laboratory strain | 3 | - | - | + | - | - |
| C2             | <i>S. Litchfield</i>       | Laboratory strain | 3 | - | - | + | - | - |
| C2             | <i>S. Kentucky</i>         | Laboratory strain | 2 | - | - | + | - | - |
| C2             | <i>S. Chailey</i>          | Laboratory strain | 2 | - | - | + | - | - |
| D              | <i>S. Enteritidis</i>      | CMCC(B) 50335     | 1 | - | - | - | + | - |
| D              | <i>S. Enteritidis</i>      | Laboratory strain | 2 | - | - | - | + | - |
| D              | <i>S. Typhi</i>            | CMCC(B) 50071     | 1 | - | - | - | + | - |
| E              | <i>S. Senftenberg</i>      | Laboratory strain | 2 | - | - | - | - | + |
| E              | <i>S. Weltevreden</i>      | Laboratory strain | 3 | - | - | - | - | + |
| E              | <i>S. London</i>           | Laboratory strain | 3 | - | - | - | - | + |
| E              | <i>S. Meleagridis</i>      | Laboratory strain | 3 | - | - | - | - | + |
| E              | <i>S. Give</i>             | Laboratory strain | 2 | - | - | - | - | + |
| E              | <i>S. Ughelli</i>          | Laboratory strain | 1 | - | - | - | - | + |
| E              | <i>S. Anatum</i>           | Laboratory strain | 1 | - | - | - | - | + |
| E              | <i>S. Muenster</i>         | Laboratory strain | 3 | - | - | - | - | + |
| F              | <i>S. Aberdeen</i>         | Laboratory strain | 1 | - | - | - | - | - |
| H              | <i>S. Carrau</i>           | Laboratory strain | 1 | - | - | - | - | - |
| H              | <i>S. Madelia</i>          | Laboratory strain | 2 | - | - | - | - | - |
| M              | <i>S. Pomona</i>           | Laboratory strain | 2 | - | - | - | - | - |
| Q              | <i>S. Wandsworth</i>       | Laboratory strain | 3 | - | - | - | - | - |
| Non-Salmonella |                            |                   |   |   |   |   |   |   |
|                | <i>E. Coli</i>             | ATCC 25922        | 1 | - | - | - | - | - |
|                | <i>E. Coli</i>             | CMCC(B) 44105     | 1 | - | - | - | - | - |
|                | <i>C. Sakazakii</i>        | ATCC 29544        | 1 | - | - | - | - | - |
|                | <i>S. Sonnei</i>           | CMCC(B) 51592     | 1 | - | - | - | - | - |
|                | <i>S. Flexneri</i>         | ATCC 12022        | 1 | - | - | - | - | - |
|                | <i>E. Cloacae</i>          | CMCC(B) 45301     | 1 | - | - | - | - | - |
|                | <i>E. Aerogenes</i>        | ATCC 13048        | 1 | - | - | - | - | - |
|                | <i>S. Marcescens</i>       | CMCC(B) 41002     | 1 | - | - | - | - | - |
|                | <i>P. Vulgaris</i>         | CMCC(B) 49027     | 1 | - | - | - | - | - |
|                | <i>Y. Enterocolitica</i>   | CMCC(B) 52204     | 1 | - | - | - | - | - |
|                | <i>A. Nitrate</i>          | NICBPB 25001      | 1 | - | - | - | - | - |
|                | <i>A. Baumannii</i>        | ATCC 19606        | 1 | - | - | - | - | - |
|                | <i>C. Malonaticus</i>      | Laboratory strain | 1 | - | - | - | - | - |
|                | <i>E. Faecalis</i>         | ATCC 29212        | 1 | - | - | - | - | - |
|                | <i>V. Parahaemolyticus</i> | ATCC 17802        | 1 | - | - | - | - | - |
|                | <i>S. Aureus</i>           | ATCC 25923        | 1 | - | - | - | - | - |
|                | <i>B. Cereus</i>           | ATCC 14579        | 1 | - | - | - | - | - |
|                | <i>B. Thuringiensis</i>    | ATCC 10792        | 1 | - | - | - | - | - |

|                         |                   |     |   |   |   |   |   |
|-------------------------|-------------------|-----|---|---|---|---|---|
| <i>B. Subtilis</i>      | ATCC 6633         | 1   | - | - | - | - | - |
| <i>B. Mycooides</i>     | ATCC 19115        | 1   | - | - | - | - | - |
| <i>L. Monocytogenes</i> | ATCC 15442        | 1   | - | - | - | - | - |
| <i>P. Aeruginosa</i>    | Laboratory strain | 1   | - | - | - | - | - |
| Total                   |                   | 147 |   |   |   |   |   |

\* Laboratory strains were isolated from food samples.

& 1, 2, 3, 4, and 5 were designed by *B-rfbJ*, *C1-9679*, *C2-pimB*, *D-rfbJ*, and *E-rfbC* for identification of serogroup B, C1, C2, D, and E, respectively.

**Table S3** Bacterial strains used in specificity tests for *S. Enteritidis* and PCR results.

| Strains               | Source *          | Number | PCR results & |   |   |   |
|-----------------------|-------------------|--------|---------------|---|---|---|
|                       |                   |        | 1             | 2 | 3 | 4 |
| <i>Salmonella</i>     |                   |        |               |   |   |   |
| <i>S. Enteritidis</i> | CMCC 50335        | 1      | +             | + | + | + |
| <i>S. Enteritidis</i> | Laboratory strain | 90     | +             | + | + | + |
| <i>S. Typhimurium</i> | ATCC 14028        | 1      | -             | - | - | - |
| <i>S. Typhimurium</i> | Laboratory strain | 9      | -             | - | - | - |
| <i>S. Derby</i>       | Laboratory strain | 8      | -             | - | - | - |
| <i>S. Indiana</i>     | Laboratory strain | 8      | -             | - | - | - |
| <i>S. Agona</i>       | Laboratory strain | 5      | -             | - | - | - |
| <i>S. Albany</i>      | Laboratory strain | 9      | -             | - | - | - |
| <i>S. Hadar</i>       | Laboratory strain | 5      | -             | - | - | - |
| <i>S. Weltevreden</i> | Laboratory strain | 9      | -             | - | - | - |
| <i>S. London</i>      | Laboratory strain | 8      | -             | - | - | - |
| <i>S. Wandsworth</i>  | Laboratory strain | 1      | -             | - | - | - |
| <i>S. Stanley</i>     | Laboratory strain | 1      | -             | - | - | - |
| <i>S. Rissen</i>      | Laboratory strain | 9      | -             | - | - | - |
| <i>S. Meleagridis</i> | Laboratory strain | 8      | -             | - | - | - |
| <i>S. Corvallis</i>   | Laboratory strain | 1      | -             | - | - | - |
| <i>S. Kottbus</i>     | Laboratory strain | 1      | -             | - | - | - |
| <i>S. Pomona</i>      | Laboratory strain | 9      | -             | - | - | - |
| <i>S. Senftenberg</i> | Laboratory strain | 9      | -             | - | - | - |
| <i>S. Braenderup</i>  | Laboratory strain | 9      | -             | - | - | - |
| <i>S. Tallahassee</i> | Laboratory strain | 1      | -             | - | - | - |
| <i>S. Newport</i>     | Laboratory strain | 1      | -             | - | - | - |
| <i>S. Potsdam</i>     | Laboratory strain | 1      | -             | - | - | - |
| <i>S. Infantis</i>    | Laboratory strain | 5      | -             | - | - | - |
| <i>S. Muenster</i>    | Laboratory strain | 1      | -             | - | - | - |
| <i>S. Manhattan</i>   | Laboratory strain | 1      | -             | - | - | - |
| <i>S. Kentucky</i>    | Laboratory strain | 1      | -             | - | - | - |
| <i>S. Chailey</i>     | Laboratory strain | 1      | -             | - | - | - |
| <i>S. Litchfield</i>  | Laboratory strain | 1      | -             | - | - | - |
| <i>S. Bareilly</i>    | Laboratory strain | 1      | -             | - | - | - |
| <i>S. Give</i>        | Laboratory strain | 1      | -             | - | - | - |
| <i>S. Montevideo</i>  | Laboratory strain | 1      | -             | - | - | - |
| <i>S. Mbandaka</i>    | Laboratory strain | 1      | -             | - | - | - |
| <i>S. Riggil</i>      | Laboratory strain | 1      | -             | - | - | - |
| <i>S. Lomita</i>      | Laboratory strain | 1      | -             | - | - | - |
| <i>S. Saintpaul</i>   | Laboratory strain | 1      | -             | - | - | - |
| <i>S. Aberdeen</i>    | Laboratory strain | 1      | -             | - | - | - |
| <i>S. Istanbul</i>    | Laboratory strain | 1      | -             | - | - | - |
| <i>S. Lagos</i>       | Laboratory strain | 1      | -             | - | - | - |
| <i>S. Singapore</i>   | Laboratory strain | 1      | -             | - | - | - |
| <i>S. Eingedi</i>     | Laboratory strain | 1      | -             | - | - | - |
| <i>S. Virchow</i>     | Laboratory strain | 3      | -             | - | - | - |

|                           |                   |            |   |   |   |   |
|---------------------------|-------------------|------------|---|---|---|---|
| <i>S. Heidelberg</i>      | Laboratory strain | 1          | - | - | - | - |
| <i>S. Thompson</i>        | Laboratory strain | 1          | - | - | - | - |
| <b>Non-Salmonella</b>     |                   |            |   |   |   |   |
| <i>E. Coli</i>            | ATCC 25922        | 1          | - | - | - | - |
| <i>E. Coli</i>            | CMCC(B) 44102     | 1          | - | - | - | - |
| <i>E. Coli</i>            | ATCC 43886        | 1          | - | - | - | - |
| <i>E. Coli O157</i>       | ATCC 12900        | 1          | - | - | - | - |
| <i>C. Sakazakii</i>       | ATCC 29544        | 1          | - | - | - | - |
| <i>C. Sakazakii</i>       | Laboratory strain | 1          | - | - | - | - |
| <i>S. Sonnei</i>          | CMCC(B) 51592     | 1          | - | - | - | - |
| <i>Y. Enterocolitica</i>  | Laboratory strain | 1          | - | - | - | - |
| <i>Y. Enterocolitica</i>  | CMCC(B) 52204     | 1          | - | - | - | - |
| <i>V. Parahemolyticus</i> | ATCC 33847        | 1          | - | - | - | - |
| <i>V. Parahemolyticus</i> | ATCC 17802        | 1          | - | - | - | - |
| <i>S. Aureus</i>          | ATCC 25923        | 1          | - | - | - | - |
| <i>S. Aureus</i>          | ATCC 29213        | 1          | - | - | - | - |
| <i>P. Aeruginosa</i>      | ATCC 9027         | 1          | - | - | - | - |
| <i>P. Aeruginosa</i>      | ATCC 15442        | 1          | - | - | - | - |
| <i>L. Monocytogenes</i>   | ATCC 19115        | 1          | - | - | - | - |
| <i>L. Monocytogenes</i>   | CMCC(B) 54002     | 1          | - | - | - | - |
| <i>B. Cereus</i>          | ATCC 14579        | 1          | - | - | - | - |
| <i>B. Subtilis</i>        | ATCC 6633         | 1          | - | - | - | - |
| <i>B. Mycoides</i>        | ATCC 10206        | 1          | - | - | - | - |
| <i>C. Jejuni</i>          | Laboratory strain | 2          | - | - | - | - |
| <b>Total</b>              |                   | <b>253</b> |   |   |   |   |

\* Laboratory strains were isolated from food samples.

& 1, 2, 3, and 4 were designed by *SE18636*, *SE16574*, *SE2599*, and *SE13329* for identification of *S. Enteritidis*.

**Table S4** Specific primer sets of PCR for identifying *Salmonella* serogroup B, C1, C2, D, E, and *S. Enteritidis*.

| Specificity           | Target gene *  | Primer sequence (5'-3') | PCR product (bp) |
|-----------------------|----------------|-------------------------|------------------|
| Serogroup B           | <i>B-rfbJ</i>  | TGTAATTGTCAGTGGGGCTT    | 876              |
|                       |                | AACCGTTTCAGTAGTTCCTC    |                  |
| Serogroup C1          | <i>C1-9679</i> | GTGACGACAAATACCCGCAG    | 244              |
|                       |                | CTGGATCGGCATACTCCACT    |                  |
| Serogroup C2          | <i>C2-pimB</i> | TTAAGTTATGCAGGCTCCGA    | 929              |
|                       |                | TCCTTGAAGAAAATGCCAGT    |                  |
| Serogroup D           | <i>D-rfbJ</i>  | CTTGGATCACGACTTACATC    | 691              |
|                       |                | CTCTTTCTTTGACCACACCA    |                  |
| Serogroup E           | <i>E-rfbC</i>  | AGTGTTTAGTGATGAACGTG    | 434              |
|                       |                | GACTATCTATTCCCCATGTA    |                  |
| <i>S. Enteritidis</i> | <i>SE18636</i> | GTCTCGGCTTCCCTTTTGCT    | 529              |
|                       | <i>SE16574</i> | TCAGACTTCCGCAATACCAT    |                  |
|                       | <i>SE2599</i>  | GGACAATTTATGCTCACAGT    | 471              |
|                       | <i>SE13329</i> | CTAACGGCTAATATCGAACC    |                  |
|                       |                | TCCTTCAGCTTGGTTTCGAT    |                  |
|                       |                | CAGTACGGCCTTATAAACCT    | 350              |
|                       |                | TCAGATCAGCGTGGAACAAT    |                  |
|                       |                | CAGGTGCGGAAAATACCAT     | 406              |

\* The detailed nucleotide sequences were listed in supplementary material.

**Table S5** Comparison of existing detection methods for *Salmonella*.

| Method                                                               | Target                                                                                                                      | Detection Time | Sensitivity                                     | Refs      |
|----------------------------------------------------------------------|-----------------------------------------------------------------------------------------------------------------------------|----------------|-------------------------------------------------|-----------|
| Real-time PCR                                                        | <i>Salmonella</i> spp. and <i>Salmonella</i> Enteritidis                                                                    | ~1 h           | 2.49 CFU/mL                                     | [1]       |
| Phage-conjugated magnetic bead separation coupled with real-time PCR | <i>Salmonella</i>                                                                                                           | 1.5 h          | < 30 CFU/mL                                     | [2]       |
| Real-time PCR                                                        | <i>Salmonella</i> Typhi, <i>Salmonella</i> Paratyphi A and other <i>Salmonella</i> spp.                                     | ~1 h           | 10 <sup>3</sup> –10 <sup>4</sup> CFU/mL         | [3]       |
| mPCR                                                                 | <i>Salmonella</i> Typhi and Paratyphi A                                                                                     | 1~2 h          | 4.5×10 <sup>4</sup> –5.5×10 <sup>4</sup> CFU/ml | [4]       |
| mPCR                                                                 | <i>Salmonella</i> Enteritidis, Typhi and Typhimurium                                                                        | 1~2 h          | 10 <sup>3</sup> CFU/mL                          | [5]       |
| mPCR                                                                 | <i>Salmonella</i> five serogroups (B, C1, C2, D, and E) and two serovars ( <i>S.</i> Enteritidis and <i>S.</i> Typhimurium) | 1~2 h          | 10 <sup>3</sup> –10 <sup>4</sup> CFU/mL         | Our study |

**Nucleotide sequences**> *B-rfbJ*

ATGACCTTTTTGAAAGAATATGTAATTGTCAGTGGGGCTTCCGGCTTTATTGGTAAGCATTTACTCGA  
AGCGCTAAAAAATCGGGGATTTCAAGTTGTCGCAATCACTCGAGATGTAATAAAAAATAATAGTAAT  
GCATTAGCTAATGTTAGATGGTGCAGTTGGGATAATATCGAATTATTAGTCGAGGAGTTATCAATTG  
ATTCTGCATTAATTGGTATCATTCAATTTGGCAACAGAATATGGGCATAAAACATCATCTCTCATAAAT  
ATTGAAGATGCAAATGTTATAAAACCATTAAGCTTCTTGATTTGGCAATAAAATATCGGGCGGATA  
TCTTTTTAAATACAGATAGTTTTTTTGCCAAGAAAGATTTAATTATCAACATATGCGGCCTTATATA  
ATTACTAAAAGACACTTTGATGAAATTGGGCATTATTATGCTAATATGCATGACATTTCAATTTGAAA  
CATGCGATTAGAGCATGTATATGGGCCTGGGGATGGTGAAAATAAATTTATTCCATACATTATCGAC  
TGCTTAAATAAAAAACAGAGTTGCGTGAAATGTACAACAGGCGAACAGATAAGAGACTTTATTTTTG  
TAGATGATGTGGTAAATGCTTATTTAACTATATTAGAAAATAGAAAAGAAGTACCTTCATATACTGA  
GTATCAAGTTGGAACGGTGTGCTGGGGTAAGTTTGAAAGATTTTCTGGTTTATTTGCAAAAATACTATGA  
TGCCAGGTTTCATCGAGTATATTTGAATTTGGTGCGATAGAGCAAAGAGATAATGAAATAATGTTCTC  
TGTAGCAAATAATAAAAATTTAAAAGCAATGGGCTGGAAACCAAATTTTCGATTATAAAAAAGGAAT  
TGAAGAACTACTGAAACGGTTATGA

> *C1-9679*

ATGATGCTGAATGTGTTTCGCGGGCGTGTGTGACGACAAATACCCGCAGATCAGCAAAAGCAGGCGT  
GCGCACTGGGAAAACCTGAACACATTCTTCAGCTACCTGCCGGATATCCGCCAGGCGATCTACACCA  
CAAACGCTATCGAATCACTGAACAGTGTGATCCGGGCCGAGATAAGAAATGCAAGGTATCCCGGG  
AGACGACTCAGTGTGGAAGGTTATTTATCTGGCGATCAAAGATGTCTCAAAAAAGTGGAGTATGCCG  
ATCCAGCACTGGCGGCTGGCAATGA

> *C2-pimB*

ATGGAAATAAATGAAATAAAAAATATCTCTCGTTCATGAGTGGTTATTAAGTTATGCAGGCTCCGAAC  
AGGTATCATCTGCCATCCTGCATGTTTTCTGAAGCGAAGTTATATTCGGTGGTTGATTTTCTAACG  
GATGAACAAAGAAGACATTTTCTGGGGAAATATGCTACTACCACATTTATTCAAAATTTACCTAAAG



CTAAAAAATTTTACCAGAAATATTTACCACTAATGCCACTGGCTATTGAACAACCTTGATTTATCAGAT  
GCTAATATCATCATTAGTAGCGCCATTCCGTTGCAAAAGGTGTTATTTCCGGACCAGATCAGCTTCA  
CATTAGCTATGTTCAATTCTCTATTTCGATATGCGTGGGATTTACAGCATCAGTACCTTAATGAGTCTA  
ACCTGAATAAAGGAATTAAGGTTGGTTAGCAAAATGGCTTCTTCACAAAATACGAATTTGGGATTC  
TCGAACCGCAAATGGGGTTGATCATTTTATAGCTAATTCTCAATATATCGCGCGTAGAATTAAAAAA  
GTATACAGACGTGAGGCTTCAGTTATATATCCGCCTGTAGATGTGGATAATTTTGAAGTAAAAAATG  
AAAAGCAAGACTATTATTTACAGCATCCCCTATGGTACCCTACAAACGTATTGATCTTATTGTGCGAA  
GCCTTTAGTAAAAATGCCGAAAAGAAATTAGTAGTTATTGGTGATGGACCGGAGATGAAAAAATA  
AAGAGCAAGGCTACAGACAATATAAAATTGCTCGGTTATCAATCTTTTCTGTTTTAAAAGAGTATAT  
GCAGAGCGCCAGGGCGTTTGTGTTTTGCAGCGGAAGAGGACTTTGGAATAATACCTGTGCGAAGCTCAA  
GCTTGCGGTACCCCTGTTATTGCCTTTGGGAAGGGTGGGGCCTTAGAAAACCGTTCGCCACTAGGTGT  
AGAGGAACCGACTGGCATTCTTCAAGGAACAGAATATTGCTTCTTGCATGAAGCTGTTAGTGAA  
TTTGAAAAAATGCATCATTTTTTACATCTCAGGCTGTAGAAAAATGCAGAAAAATTTTCTCGATC  
AAGATTTGAACAAGAATTTAAGAACTTTGTTAATGAAAAGTGAATCTTTTCAAAACAGAACAGATT  
ATTAACGTAA

> *D-rfbJ*

ATGAAAATTCTAATAATGGGAGCGTTTGGGTTCTTGGATCACGACTTACATCCTACTTCGAAAAGTCG  
ACATACTGTGATTGGCTTAGCAAGGAAGAGGAACAATGAAGCTACCATAAATAATATTATTACACG  
ACAGAAAATAATTGGATCGAAAAAATAGTAGAATTTAAACCGAATATTATTATTAACACTATTGCTT  
GCTATGGAAGACATAACGAACCTGCAACAGCTTAATAGAAAAGCAATATTCTTATGCCTATCAGGGT  
ATTAGAATCTATCTCATCACTTGATGCAGTATTCATAAATTGTGGAACATCACTGCCACCAAATACGA  
GTTTATATGCATATACTAAACAAAAGCAAATGAACTCGCCGCCATTATAGATAAAGTTTGC GG  
TAAATATATAGAGTTAAAATTGGAGCATTCTATGGAGCTTTTGATGGAGACGATAAGTTTACCAGT  
ATGGTTATTAGACGTTGTTAAGTAACCAGCCAGTAAAGTTAACATCTGGTTTGCAACAGAGAGATT  
TCTTGTATATAAAAAGATCTACTAACAGCGTTCGATTGTATTATAAGTAATGTTAATAATTTTCCCAA  
TTTCATAGTATTGAAGTTGGTAGTGAAAGGCTATATCAATTCGTGAATATGTAGAGACTGTTAAAA  
ATATCACAAAAGCAATTCTATAATTGAATTTGGTGTGGTCAAAGAAAAGAGCCAATGAATTGATGTA  
TAGTTGTGCTGATATAGCAGAACTTGAAAAAATAGGATGGAAAAGAGAGTTCTCTCTTGTGATGCA  
TTAACTGAAATAATTGAAGAGGAAGGGAAATGA

> *E-rfbC*

ATGAACGTTATTAACAGAAATTCCTGATGTATTAATTTTTGAACCTAAAGTGTTTAGTGATGAACG  
TGGGTTCTTTATGGAAAGTTTAAATCAGAAAGTATTTGAGGAAGCGTTGGTCGAAAGATTGAATTT  
GTTCAGGATAATCATTCAAATCAACTAAAGGTGTGTTACGTGGTTTACATTATCAAGTTGAACCTTA  
TGCTCAAGGGAAGCTTGACGCTGTATAGCGGGAGAAGTTTTTGATGTTGCTGTAGATATTCGCAA  
GATTCCGAAACGTTTGGTAAATGGGTTGGTGTCAATATTTCTTCTGAAAACAAAAGGCAGTTGTGGA  
TACCTGAAGGTTTTGCTCATGGGTTCTTAGTATTAAGTGAAGAAGCTGAATTTGTTTATAAGACATCA  
AACTATTACTCGGGCGAACATGAAAGAGGTATTTTGGAAATGATCCTGATATTAATATTACATGGG  
GAATAGATAGTCCAATTCTTTTCAATAAAGATAAGATTCATAAAGGTTTAGTAAAGTAA

> *SE18636*

ATGAGCGACAATAAAACAGAATACTCATATTATATTAAGGTTAAAAATGAAAGCGCCCGGAAACGT  
CTCGGCTTCCCTTTTGTCTTCTGGTGGAAAAGTAAAGCAGCGAAGCCGCTGCCACAGCACGCCTTGC  
CGTATCAATGCTTGACGCCGATTTCGAACCGACAGATTTTGCAAACCGGTTTCGCGTTAATCCCCCG  
CTGTTAACGAACTTCCGCCGAGGGAAAGTTTTGATACCACCTTCTGTGAGAAAATATGAGCTGGGCGG  
CGAAGATGGCAAAACATTTATGCTCATCCCCGGCAGCCCGCTACTGACGCCACGACGAAAAACG

GAGGAATGCGCCGACGACGCTGGCACCGAAGAAAGCGGGACAGACACCAGTGACAACGACGAATG  
TCAGGACTGCGAAGTTTCCGTCGCCACCCTGCCGTTCCCCAGCGCGTGTGCACATTTTACTTACG  
CTGCCACAGACAAAAATATTTGCATCACGCCACCCGCGCTCAACGCAGGCATATTACCGTTCTCGA  
AATGGAACAGGAAAACAGCTATATCCAGAACCTGTTAATGGTATTGCGGAAGTCTGAACAGGTTTCAT  
GCCCAGGATGAGTAA

> SE16574

ATGTCAGAAACCGCTCTGGTTATCGTAAAATTCCTAATTGGTAAATCCGTCGGACAATTTATGCTCAC  
AGTGGCTTTATTTTTCTTAATTATCATCTTCATTCCCTAGAGATATTACGGAGCTTATTGAGGCGCGTAG  
CGATTTACCATATGCCGTTTCAGATTTTTAGTTTTGCTGTGGCTTACCTTATAGTGCTGATCCTCAAAGT  
CACTGGTTATTTTTTCGTGTGCGGCGCTGCCGTTGTGCCAGCGTAGGGGCAGGGCAAAACGCATGTTA  
AAAACGCTTAATTCATTGAGTACTGAACAGCTGTTTTACTTGAACCCTTTCTTAAAACTCATTCTCCC  
ACTTTCCGGGCGTCTGGGATAACCCTGATGCAGATGCTCTGGTTAAGGCAGGTATCGTTCGTCCGGC  
TGGTTCGTGTATCGACGGTGTTCGTGTGATGTTCAAATCGAACCCGAGTATGAGTCGTTAATGCTTT  
CCACCTGGAATCCCTGCACAAAACGGTTCGATATTAGCCGTTAG

> SE2599

ATGGCGCATCTACAACCTTGTTAAACAAACCTCATCAGGGCTTCTGCTCCCGGCAACGCCGGAGAGTG  
AGGACTTCCTGCGCTCAGTAAAAATCGGTGCGTGGATACACGCCGATTTAAGCGAGTACGTAACCTA  
CGCGTTCCACAAACGTTTTTTCAAGCTCCTTCAGCTTGGTTTCGATTACTGGACTCCGATCGGCGGGG  
CGATCCTGCCTCAGGAACAGGAGCTGATTACCGGCTTTGTCGATTTCTGTGTGAGTCAGCAGCGCA  
GGGCCACAGTCCCGCACTCAGTGACGCGGCGGAACAGTACCTGCATAAGGTTGCTGTCAACCGAACG  
CTCGATGTTGCGCTGCTCAAGTCCTTCGACGCTTTCGCGAGTGGGTAACCATTACGGCCGGGTTTTA  
TACTGAGCATTATTATCCGGATGGCAGCCGTGGGCGCCGGCGAAATCCATCGCTTTTGCGAATATG  
GACGAAACCGAGTTTCAGCAGGTTTATAAGGCCGTAAGTGAACGTCCTGTGGAAGTGGATTCTGTTTC  
GTAATTTCTCTCTCCGGAAGAGGTGCAAAATGTCGACGCGCAACTGCTGGAGTTTGCGTAA

> SE13329

ATGAATAAAATAAATGTGCTGGGTGTAATAATAAAACACTACAAAACAATGTCAGATCAGCGTGGA  
ACAATGTTGATGAGCGACATTATCGTACATTTTATTGTTCCGTTATCTCTTTCTTTCTGTTCTGTGCTGG  
ACATACGGAATAATGAAACCGGCAATTGCTTCCGCTTTGTTAACTTCGGGGCTATTACAACAGCACT  
ATTAATGAGTGCAGTAATAATGATTTATGAACAAAAACAAAAACCATCACTAAGATATCAGACATA  
ATTGAAGGAAACAAATCCCGAGACAAATTGATATCATTAACACTAACAAAACCATATATGAGCAG  
TTATGCCACAACGTCGCTTATGCAATATTAACCTCAATAGTATTGGTTATATTTTCAGTGATAATATA  
TTTCTGCCTGACAATGCAGTGGATTAATGAAATGGTATTTTCGCGCACCTGCATATATTGTTAGCT  
TTTTAGCCTATACATCTTTTTTATCACTGTTATAACGTTCTTAATGGTAATAAAAAAGATTTAGCACAA  
TTTTAGATAATTGA

## References

- [1] J. Wan, L. Zheng, L. Kong, Z. Lu, Y. Tao, Z. Feng, F. Lv, F. Meng, X. Bie, Development of a rapid detection method for real-time fluorescent quantitative PCR of *Salmonella* spp. and *Salmonella* Enteritidis in ready-to-eat fruits and vegetables, *LWT-Food Sci. Technol.* 149 (2021) 111837. <https://doi.org/10.1016/j.lwt.2021.111837>.
- [2] C. Huang, B. Y. Mahboubat, Y. Ding, Q. Yang, J. Wang, M. Zhou, X. Wang, Development of a rapid *Salmonella* detection method via phage-conjugated magnetic bead separation coupled with real-time PCR quantification, *LWT-Food Sci. Technol.* 142 (2021) 111075. <https://doi.org/10.1016/j.lwt.2021.111075>.
- [3] C. S. J. Teh, M. Y. Lau, C. W. Chong, S. T. Ngoi, K. H. Chua, W. S. Lee, K. L. Thong, One-step differential detection of *Salmonella* enterica serovar Typhi, serovar Paratyphi A and other *Salmonella*

- spp. by using a quadruplex real-time PCR assay, *Journal of Microbiological Methods* 183 (2021) 106184. <https://doi.org/10.1016/j.mimet.2021.106184>.
- [4] G. J. Yin Ngan, L. M. Ng, R. T. P. Lin, J. W. P. Teo, Development of a novel multiplex PCR for the detection and differentiation of *Salmonella* enterica serovars Typhi and Paratyphi A, *Research in Microbiology* 161 (2010) 243-248. <https://doi.org/10.1016/j.resmic.2010.03.005>.
- [5] C. G. de Freitas, Â. P. Santana, P. H. C. da Silva, V. S. P. Gonçalves, M. d. A. F. Barros, F. A. G. Torres, L. S. Murata, S. Perecmanis, PCR multiplex for detection of *Salmonella* Enteritidis, Typhi and Typhimurium and occurrence in poultry meat, *Int. J. Food Microbiol.* 139 (2010) 15-22. <https://doi.org/10.1016/j.ijfoodmicro.2010.02.007>.
